# Supplementary material for: Self-assembly of fluorescent diimidazolium salts: tailor properties of the aggregates changing alkyl chain features
Source: Royal Society of Chemistry journal article supplement (doi:10.1039/c6ra10250f), 2016-01-01
Supplement: c6ra10250f1.pdf [file c6ra10250f1.pdf]

## Electronic Supplementary Information

### Self-assembly of fluorescent diimidazolium salts: tailor properties of the aggregates changing alkyl chain features

Florian Billeci, Francesca D'Anna,\* Salvatore Marullo, Renato Noto

|                                                                                                                                                                                                                                                                                          |         |
|------------------------------------------------------------------------------------------------------------------------------------------------------------------------------------------------------------------------------------------------------------------------------------------|---------|
| Synthesis of <i>N,N'</i> -bis-(3-imidazol-yl-propyl)naphthalene-diimide.                                                                                                                                                                                                                 | S1      |
| General synthesis of <i>N,N'</i> -bis-(1-alkyl-3-propylimidazolium)naphthalene-diimide diiodide salts.                                                                                                                                                                                   | S1-S2   |
| Synthesis of <i>N,N'</i> -bis-[1-propyl-3-(3,3,4,4,5,5,6,6,7,7,8,8,8-tridecafluorooctyl)imidazolium]-naphthalene-diimide diiodide [ <b>C<sub>8</sub>FNDI</b> ][ <b>I</b> ].                                                                                                              | S2      |
| Synthesis of <i>N,N'</i> -bis-[1-(3,3,4,4,5,5,6,6,7,7,8,8,9,9,10,10,11,11,12,12,12-enicosafuorododecyl)-3-propylimidazolium]-naphthalene-diimide diiodide [ <b>C<sub>12</sub>FNDI</b> ][ <b>I</b> ].                                                                                     | S3      |
| Determination of thermodynamic parameters from temperature dependent measurements                                                                                                                                                                                                        | S4      |
| <b>Table S1.</b> Melting temperatures, enthalpy and entropy values determined by DSC Measurements.                                                                                                                                                                                       | S5      |
| <b>Table S2.</b> Salts concentration corresponding to the onset of aggregation ( $C_{on}$ ) for [ <b>C<sub>n</sub>NDI</b> ][ <b>I</b> ] salts as a function of solvent.                                                                                                                  | S5      |
| <b>Table S3.</b> Position of main emission band ( $\lambda_{max}$ ) in solution and in solid state as a function of alkyl chain and solvent.                                                                                                                                             | S5      |
| <b>Figure S1.</b> DSC thermograms of the synthesized salts.                                                                                                                                                                                                                              | S6-S7   |
| <b>Figure S2.</b> UV-vis and fluorescence spectra of salts as function of solvent.                                                                                                                                                                                                       | S7-S9   |
| <b>Figure S3.</b> UV-vis and fluorescence spectra of salts as a function of concentration and solvent                                                                                                                                                                                    | S9-S14  |
| <b>Figure S4.</b> Absorbance and fluorescence intensity as a function of concentration and solvent.                                                                                                                                                                                      | S14-S20 |
| <b>Figure S5.</b> Plot of $\alpha_{agg}$ as a function of concentration and solvent.                                                                                                                                                                                                     | S20-S23 |
| <b>Figure S6.</b> UV-vis spectra at fixed concentration as a function of temperature.                                                                                                                                                                                                    | S23-S24 |
| <b>Figure S7.</b> $\alpha$ and van't Hoff plot of UV-vis analysis at variable temperature and fixed concentration.                                                                                                                                                                       | S25-S27 |
| <b>Figure S8.</b> Plot of (a) $\Delta H$ and (b) $\Delta S$ as a function of the alkyl chain length.                                                                                                                                                                                     | S28     |
| <b>Figure S9.</b> <sup>1</sup> H NMR spectra at variable temperature of [ <b>C<sub>6</sub>NDI</b> ][ <b>I</b> ] in DMSO- $[d_6]$ , [ <b>C<sub>12</sub>NDI</b> ][ <b>I</b> ] in DMSO- $[d_6]$ and [ <b>C<sub>12</sub>NDI</b> ][ <b>I</b> ] in CD <sub>2</sub> Cl <sub>2</sub> - $[d_2]$ . | S29-S31 |
| <b>Figure S10.</b> <sup>1</sup> H NMR spectra at variable temperature of [ <b>C<sub>8</sub>FNDI</b> ][ <b>I</b> ] in DMSO- $[d_6]$ and [ <b>C<sub>12</sub>FNDI</b> ][ <b>I</b> ] in DMSO- $[d_6]$ .                                                                                      | S32-S33 |
| <b>Figure S11.</b> Fluorescence spectra in solution and in solid phase of salts.                                                                                                                                                                                                         | S34-S35 |
| <b>Figure S12.</b> SEM images.                                                                                                                                                                                                                                                           | S36     |
| <b>Figure S13.</b> <sup>1</sup> H NMR and <sup>13</sup> C NMR spectra of synthesized salts.                                                                                                                                                                                              | S37-S44 |
| <b>Figure S14.</b> ESI mass spectra of synthesized salts.                                                                                                                                                                                                                                | S45-S46 |

**Synthesis of *N,N'*-bis-(3-imidazol-yl-propyl)naphthalene-diimide.**

1,4,5,8-naphthalenetetracarboxylic dianhydride (1.00 g;  $3.73 \cdot 10^{-3}$  mol) was dissolved in 12.5 mL of anhydrous DMF, and the solution obtained was heated at 80 °C. Into a two-neck flask, 1-(3-aminopropyl)imidazole (1.026 g;  $8.21 \cdot 10^{-3}$  mol) was dissolved in 12.5 mL of anhydrous DMF and obtained solution was heated at 140 °C.

The solution of 1,4,5,8-naphthalenetetracarboxylic dianhydride was added to the 1-(3-aminopropyl)imidazole solution. The mixture was stirred at 140 °C for 24 hours.

The resulting mixture was allowed to cool down, poured in water/acetone (3/1; 30 mL) mixture, then in cold diethyl ether. Stirring for 30 minutes afforded a dark precipitate. The solid was filtered off in vacuo and thoroughly washed with diethyl ether and small amounts of ethanol.

Yield: 70%; dark solid.  $^1\text{H-NMR}$  (400 MHz, DMSO- $d_6$ );  $\delta$  (ppm): 8.63 (s, 4H); 7.66 (s, 2H); 7.21 (s, 2H); 6.87 (s, 2H); 4.10 (m, 8H); 2.13 (m, 4H).

**General synthesis of *N,N'*-bis-(1-alkyl-3-propylimidazolium)naphthalene-diimidediiodide salts.**

*N,N'*-bis-(3-imidazol-yl-propyl)naphthalene-diimide (0.25 g;  $5.19 \cdot 10^{-4}$  mol) was dissolved in 10 mL of anhydrous DMF, and solution obtained was heated at 80 °C. Into a two-neck flask, the suitable alkyl iodide ( $1.14 \cdot 10^{-3}$  mol) was dissolved in 10 mL of anhydrous DMF; the solution was then heated at 90 °C.

The solution of *N,N'*-bis-(3-imidazol-yl-propyl)naphthalene-diimide was added to the alkyl iodide solution. The mixture was stirred at 90 °C for 72 hours.

The solvent was removed in vacuo and the dark solid obtained was washed with diethyl ether (20 mL), with ultrasounds irradiation until a colourless organic phase was obtained. Finally, the dark solid was washed with refluxing ethyl acetate (50 mL) overnight.

***N,N'*-bis-(1-hexyl-3-propylimidazolium)naphthalene-diimidediiodide [ $\text{C}_6\text{NDI}$ ][I].**

Yield: 90%; dark solid; m. p.: 170.8 °C.  $^1\text{H-NMR}$  (400 MHz, DMSO- $d_6$ );  $\delta$  (ppm): 9.21 (s, 2H); 8.70 (s, 4H); 7.83 (d,  $J = 8.0$  Hz, 4H); 4.32 (m, 5H); 4.17 (m, 7H); 2.28 (m, 4H), 1.79 (m, 4H), 1.27 (bs, 12H), 0.86 (m, 6H).  $^{13}\text{C-NMR}$  (400 MHz, DMSO- $d_6$ );  $\delta$  (ppm): 163.3; 136.6; 130.9; 126.9; 122.9; 49.4; 47.5; 31.0; 29.7; 28.6; 25.5; 22.3; 14.2. HRMS calcd. for  $\text{C}_{38}\text{H}_{48}\text{N}_6\text{O}_4$  326.1863, found 326.1899.

***N,N'*-bis-(1-heptyl-3-propylimidazolium)naphthalene-diimidediiodide [ $\text{C}_7\text{NDI}$ ][I].**

Yield: 87%; dark solid; m. p.: 170.1 °C.  $^1\text{H-NMR}$  (400 MHz, DMSO- $d_6$ );  $\delta$  (ppm): 9.25 (s, 2H); 8.70 (s, 4H); 7.83 (d,  $J = 8.0$  Hz, 4H); 4.32 (m, 5H); 4.17 (m, 7H); 2.27 (m, 4H); 1.79 (m, 4H); 1.25 (m, 16H); 0.84 (t,  $J = 4.0$  Hz, 6H).  $^{13}\text{C-NMR}$  (400 MHz, DMSO- $d_6$ );  $\delta$  (ppm): 163.3; 136.6; 130.9; 126.9; 126.7; 122.9; 31.7; 29.4; 25.9; 22.5; 14.4. HRMS calcd. for  $\text{C}_{40}\text{H}_{52}\text{N}_6\text{O}_4$  340.2019, found 340.2057.

***N,N'*-bis-(1-octyl-3-propylimidazolium)naphthalene-diimidediiodide [C<sub>8</sub>NDI][I].**

Yield: 83%; dark solid; m. p.: 146.9 °C. <sup>1</sup>H-NMR (400 MHz, DMSO-d<sub>6</sub>); δ (ppm): 9.21 (s, 2H); 8.70 (s, 4H); 7.83 (d, J = 8.0 Hz, 4H); 4.32 (m, 5H); 4.17 (m, 7H); 2.28 (m, 4H); 1.80 (m, 4H); 1.25 (m, 20H); 0.84 (m, 6H). <sup>13</sup>C-NMR (400 MHz, DMSO-d<sub>6</sub>); δ (ppm): 163.3; 130.9; 130.8; 126.9; 123.0; 122.9; 49.4; 47.4; 31.6; 31.4; 29.7; 28.9; 25.9; 22.4; 14.3. HRMS calcd. for C<sub>42</sub>H<sub>56</sub>N<sub>6</sub>O<sub>4</sub> 354.2176, found 354.2213.

***N,N'*-bis-(1-nonyl-3-propylimidazolium)naphthalene-diimidediiodide [C<sub>9</sub>NDI][I].**

Yield: 85%; dark solid; m. p.: 200.2 °C. <sup>1</sup>H-NMR (400 MHz, DMSO-d<sub>6</sub>); δ (ppm): 9.21 (s, 2H); 8.70 (s, 4H); 7.83 (d, J = 8.0 Hz, 4H); 4.32 (m, 5H); 4.17 (m, 7H); 2.28 (m, 4H); 1.79 (s, 4H); 1.24 (m, 24H); 0.83 (m, 6H). <sup>13</sup>C-NMR (400 MHz, DMSO-d<sub>6</sub>); δ (ppm): 163.3; 136.6; 130.9; 126.9; 122.9; 49.3; 37.6; 31.7; 30.6; 29.8; 29.0; 25.9; 22.5; 14.4. HRMS calcd. for C<sub>44</sub>H<sub>60</sub>N<sub>6</sub>O<sub>4</sub> 368.2332, found 368.2337.

***N,N'*-bis-(1-decyl-3-propylimidazolium)naphthalene-diimidediiodide [C<sub>10</sub>NDI][I].**

Yield: 85%; dark solid; m. p.: 104.0 – 106.8 °C. <sup>1</sup>H-NMR (400 MHz, DMSO-d<sub>6</sub>); δ (ppm): 9.22 (s, 2H); 8.70 (s, 4H); 7.84 (d, J = 8.0 Hz, 4H); 4.32 (m, 5H); 4.17 (m, 7H); 2.27 (m, 4H); 1.79 (m, 4H); 1.22 (m, 28H); 0.83 (m, 6H). <sup>13</sup>C-NMR (300 MHz, DMSO-d<sub>6</sub>); δ (ppm): 163.4; 136.6; 130.9; 126.9; 126.7; 122.9; 55.5; 49.4; 47.4; 37.7; 34.8; 31.7; 29.8; 29.4; 29.3; 29.1; 28.8; 25.9; 22.5; 14.4. HRMS calcd. for C<sub>44</sub>H<sub>60</sub>N<sub>6</sub>O<sub>4</sub> 382.2489, found 382.2500.

***N,N'*-bis-(1-propyl-3-undecylimidazolium)naphthalene-diimidediiodide [C<sub>11</sub>NDI][I].**

Yield: 88%; dark solid; m. p.: 202.6 °C. <sup>1</sup>H-NMR (400 MHz, DMSO-d<sub>6</sub>); δ (ppm): 9.21 (s, 2H); 8.70 (s, 4H); 7.83 (d, J = 8.0 Hz, 4H); 4.32 (m, 5H); 4.17 (m, 7H); 2.27 (m, 4H); 1.79 (m, 4H); 1.22 (m, 32H); 0.83 (m, 6H). <sup>13</sup>C-NMR (400 MHz, DMSO-d<sub>6</sub>); δ (ppm): 163.3; 136.6; 130.9; 126.9; 126.7; 122.9; 49.4; 47.4; 46.6; 37.6; 34.9; 31.7; 29.7; 29.4; 29.2; 29.1; 28.8; 28.5; 25.9; 22.5; 14.4. HRMS calcd. for C<sub>46</sub>H<sub>64</sub>N<sub>6</sub>O<sub>4</sub> 396.2645, found 396.2656.

***N,N'*-bis-(1-dodecyl-3-propylimidazolium)naphthalene-diimidediiodide [C<sub>12</sub>NDI][I].**

Yield: 88%; dark solid; m. p.: 144.0 °C. <sup>1</sup>H-NMR (400 MHz, DMSO-d<sub>6</sub>); δ (ppm): 9.22 (s, 2H); 8.70 (s, 4H); 7.84 (d, J = 8.0 Hz, 4H); 4.32 (m, 5H); 4.17 (m, 7H); 2.27 (m, 4H); 1.79 (s, 4H); 1.20 (m, 36H); 0.83 (m, 6H). <sup>13</sup>C-NMR (400 MHz, DMSO-d<sub>6</sub>); δ (ppm): 163.3; 156.1; 136.6; 131.1; 130.9; 129.8; 126.9; 122.9; 108.2; 49.4; 47.4; 31.4; 29.8; 28.5; 25.9; 24.5; 22.4; 14.3; 9.1. HRMS calcd. for C<sub>48</sub>H<sub>68</sub>N<sub>6</sub>O<sub>4</sub> 410.2802, found 410.2813.

**Synthesis of *N,N'*-bis-[1-propyl-3-(3,3,4,4,5,5,6,6,7,7,8,8,8-tridecafluorooctyl)imidazolium]-naphthalene-diimidediiodide [C<sub>8</sub>FNDI][I].**

*N,N'*-bis-(3-imidazol-yl-propyl)naphthalene-diimide (0.100 g;  $2.075 \cdot 10^{-4}$  mol) was dissolved in 5 mL of anhydrous DMF, and the solution obtained was heated at 80 °C. Into a two-neck flask, 1,1,2,2-tetrahydroperfluorooctylidide (0.216 g;  $4.56 \cdot 10^{-4}$  mol) was dissolved in 5 mL of anhydrous DMF; the solution was heated at 80 °C. The solution of *N,N'*-bis-(3-imidazol-yl-propyl)naphthalene-diimide was added to the solution of alkyl iodide. The mixture was stirred, under argon atmosphere at 80 °C for 4 days.

The solvent was removed in vacuo and the dark solid obtained was washed with diethyl ether (20 mL), with ultrasounds irradiation until a colourless organic phase was obtained. Finally, the dark solid was washed with refluxing ethyl acetate (50 mL) overnight.

Yield: 81%; dark solid; m. p.: 179.2 °C. <sup>1</sup>H-NMR (400 MHz, DMSO-d<sub>6</sub>); δ (ppm): 9.30 (s, 2H); 8.86-8.71 (m, 6H); 7.91-7.54 (m, 8H); 4.59 (m, 2H); 4.37 (m, 5H); 4.15 (m, 5H); 2.27 (m, 8H).

HRMS calcd. for C<sub>42</sub>H<sub>30</sub>F<sub>26</sub>N<sub>6</sub>O<sub>4</sub> 588.0951, found 588.0945.

**Synthesis of *N,N'*-bis-[1-(3,3,4,4,5,5,6,6,7,7,8,8,9,9,10,10,11,11,12,12,12-enicosafluorododecyl)-3-propylimidazolium]-naphthalene-diimidediiodide [C<sub>12</sub>FNDI][I].**

*N,N'*-bis-(3-imidazol-yl-propyl)naphthalene-diimide (0.100 g;  $2.075 \cdot 10^{-4}$  mol) was dissolved in 5 mL of anhydrous DMF and the solution obtained was heated at 80 °C. Into a two-neck flask, 1,1,2,2-tetrahydroperfluorododecylidide (0.31 g;  $4.56 \cdot 10^{-4}$  mol) was dissolved in 5 mL of anhydrous DMF; the solution was heated at 120 °C.

The solution of *N,N'*-bis-(3-imidazol-yl-propyl)naphthalene-diimide was added to the solution of alkyl iodide. The mixture obtained was stirred, under argon atmosphere, at 120 °C for 4 days.

The solvent was removed in vacuo and the dark solid obtained was washed with diethyl ether (20 mL) with ultrasounds irradiation until a colourless organic phase was obtained. Finally, the dark solid was washed with refluxing ethyl acetate (50 mL) overnight.

Yield: 50%; dark solid; m. p.: 182.2 °C. <sup>1</sup>H-NMR (400 MHz, DMSO-d<sub>6</sub>); δ (ppm): 9.30 (s, 2H); 8.87-8.70 (m, 6H); 7.92-7.56 (m, 8H); 4.58 (m, 2H); 4.30 (m, 5H); 4.11 (m, 5H); 2.25 (m, 8H).

HRMS calcd. for C<sub>50</sub>H<sub>30</sub>F<sub>42</sub>N<sub>6</sub>O<sub>4</sub> 788.0902, found 788.0823.

### Determination of thermodynamic parameters from temperature dependent measurements

To determine the thermodynamic parameters we used the procedure reported by Meijer et al.<sup>[1]</sup>

To this aim, we first calculated the number averaged degree of polymerization at each temperature

$DP_n(T)$  by means of equation (1).

$$DP_n(T) = \frac{1}{\sqrt{1 - \alpha_{agg}(T)}} \quad (1)$$

At a given temperature  $DP_n$  is related to the association constant  $K_{ass}$  by equation (2), rearrangement of which yields  $K_{ass}$  as expressed by equation (3), where  $C_T$  is the total concentration of salt.

$$DP_n(T) = \frac{1}{2} + \frac{1}{2}\sqrt{4 \cdot K_{ass}(T) \cdot C_T + 1} \quad (2)$$

$$K_{ass} = \frac{[(2 \cdot DP_n(T) - 1)^2 - 1]}{4 \cdot C_T} \quad (3)$$

- [1] M. M. J. Smulders, M. M. L. Nieuwenhuizen, T. F. A. de Greef, P. van der Schoot, A. P. H. J. Schenning, E. W. Meijer, *Chem. Eur. J.* **2010**, *16*, 362-367.

**Table S1.** Melting temperatures, enthalpy and entropy values determined by DSC measurements.

| Salt                      | $T_m$ (°C) | $\Delta H_m$ (J/mol) | $\Delta S_m$ (J/K mol) |
|---------------------------|------------|----------------------|------------------------|
| [C <sub>6</sub> NDI][I]   | 170.8      | 316                  | 1.0                    |
| [C <sub>7</sub> NDI][I]   | 170.1      | 4000                 | 9.0                    |
| [C <sub>8</sub> NDI][I]   | 146.9      | 792                  | 2.0                    |
| [C <sub>9</sub> NDI][I]   | 200.2      | 1344                 | 3.0                    |
| [C <sub>10</sub> NDI][I]  | -          | -                    | -                      |
| [C <sub>11</sub> NDI][I]  | 202.6      | 1420                 | 3.0                    |
| [C <sub>12</sub> NDI][I]  | 144.0      | 4600                 | 11.0                   |
| [C <sub>8</sub> FNDI][I]  | 179.2      | 3440                 | 8.0                    |
| [C <sub>12</sub> FNDI][I] | 182.2      | 4920                 | 11.0                   |

**Table S2.** Salts concentration corresponding to the onset of aggregation ( $C_{on}$ ) for [C<sub>n</sub>NDI][I] salts as a function of solvent.

| Salt                      | $10^6 \cdot C_{on, THF}$ □ □ M □ | $10^6 \cdot C_{on, DMF}$ □ □ M □ | $10^6 \cdot C_{on, CHCl_3}$ □ □ M □ | $10^6 \cdot C_{on, 1,4-Diox}$ □ □ M □ |
|---------------------------|----------------------------------|----------------------------------|-------------------------------------|---------------------------------------|
| [C <sub>6</sub> NDI][I]   | 2.6                              | 2.3                              |                                     |                                       |
| [C <sub>7</sub> NDI][I]   | 5.5                              | 1.8                              |                                     |                                       |
| [C <sub>8</sub> NDI][I]   | 3.1                              | 1.1                              |                                     |                                       |
| [C <sub>9</sub> NDI][I]   | 2.4                              | 2.0                              |                                     |                                       |
| [C <sub>10</sub> NDI][I]  | 3.3                              | 1.9                              |                                     |                                       |
| [C <sub>11</sub> NDI][I]  | 1.9                              | 1.3                              |                                     |                                       |
| [C <sub>12</sub> NDI][I]  | 1.0                              | 2.4                              | 3.0                                 | 2.6                                   |
| [C <sub>8</sub> FNDI][I]  |                                  | 2.7                              |                                     |                                       |
| [C <sub>12</sub> FNDI][I] |                                  | 3.3                              |                                     |                                       |

**Table S3.** Position of main emission band ( $\lambda_{max}$ ) in solution and in solid state as a function of alkyl chain and solvent.

| Salt                     | $\lambda_{max}$ (nm) |          |             |          |                   |          |             |          |
|--------------------------|----------------------|----------|-------------|----------|-------------------|----------|-------------|----------|
|                          | THF                  |          | DMF         |          | CHCl <sub>3</sub> |          | 1,4-dioxane |          |
|                          | Solid state          | Solution | Solid state | Solution | Solid state       | Solution | Solid state | Solution |
| [C <sub>6</sub> NDI][I]  | 376                  | 410      |             |          |                   |          |             |          |
| [C <sub>7</sub> NDI][I]  | 375                  | 408      |             |          |                   |          |             |          |
| [C <sub>8</sub> NDI][I]  | 375                  | 408      |             |          |                   |          |             |          |
| [C <sub>9</sub> NDI][I]  | 375                  | 393      |             |          |                   |          |             |          |
| [C <sub>10</sub> NDI][I] | 375                  | 408      |             |          |                   |          |             |          |
| [C <sub>11</sub> NDI][I] | 375                  | 408      |             |          |                   |          |             |          |
| [C <sub>12</sub> NDI][I] | 375                  | 410      | 375         | 419      | 375               | 410      | 376         | 420      |

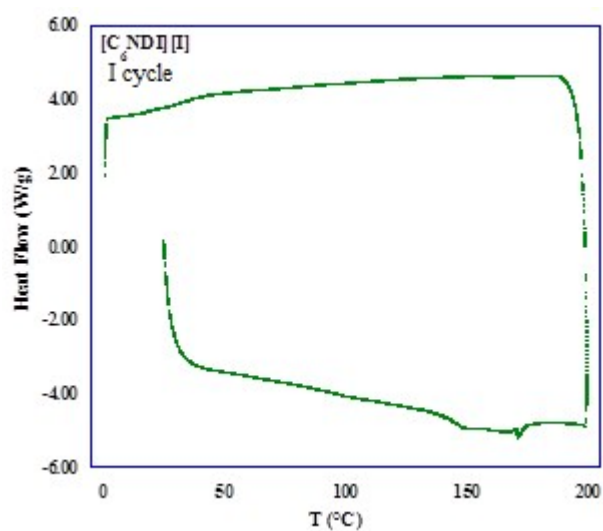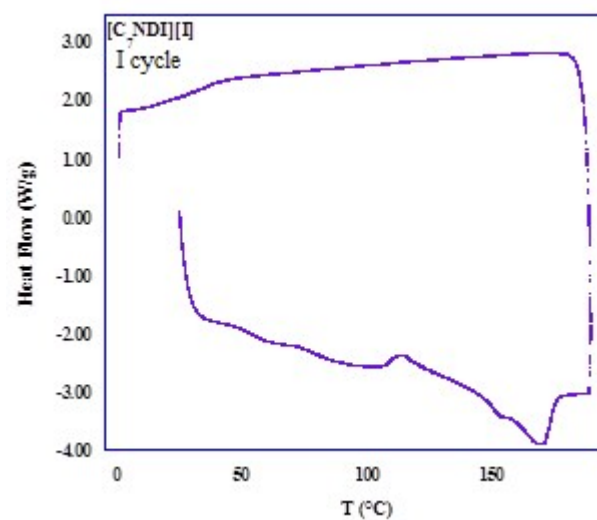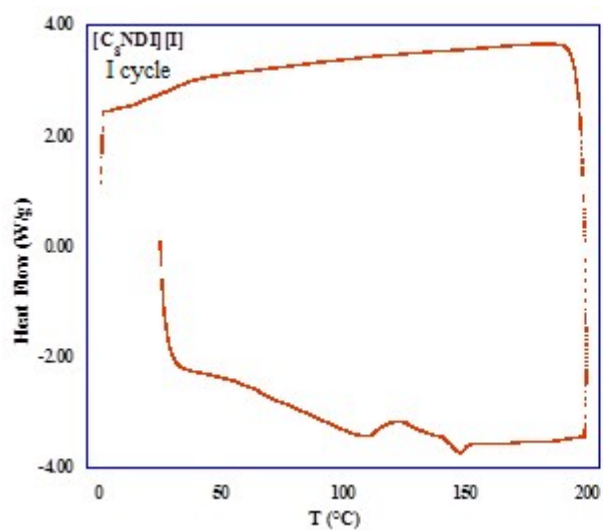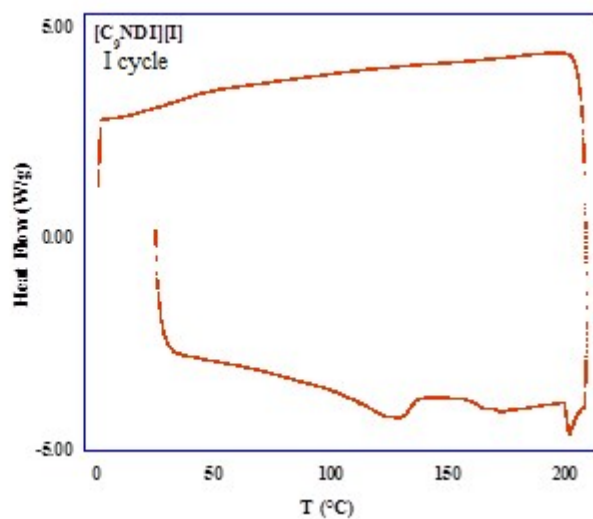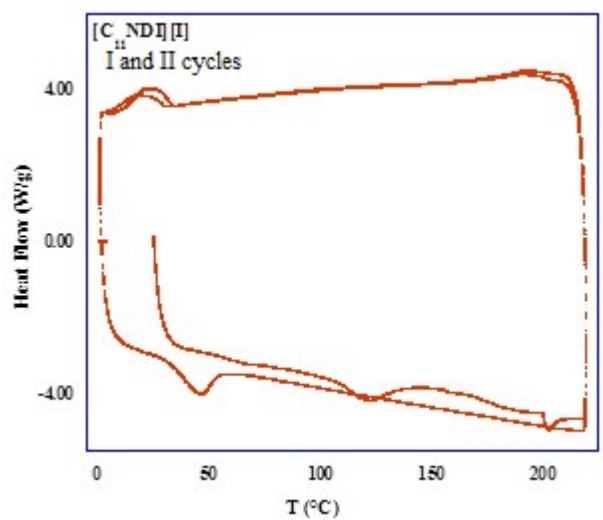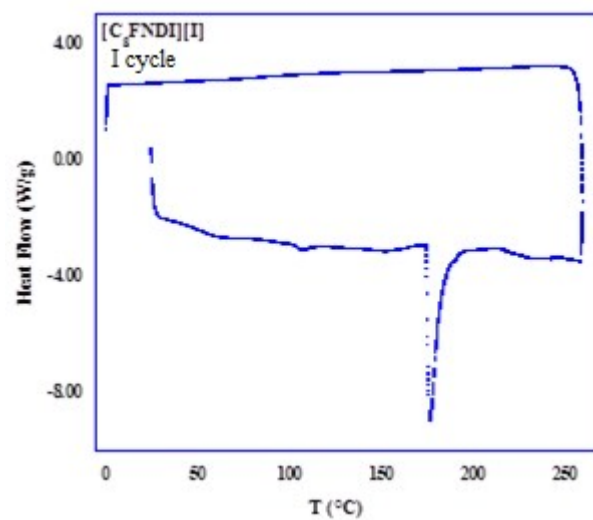

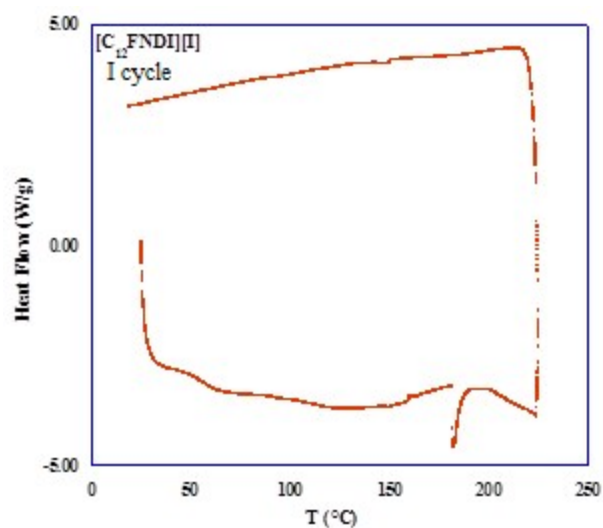

Figure S1. DSC thermograms of the synthesized salts.

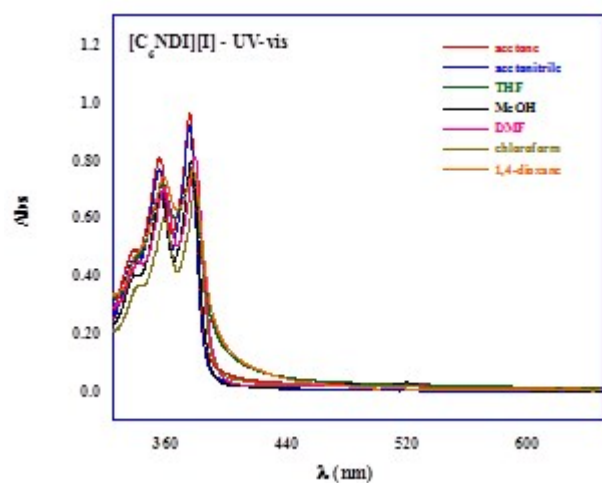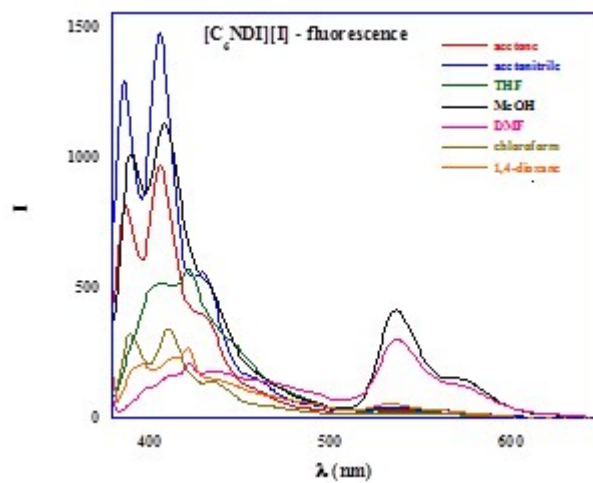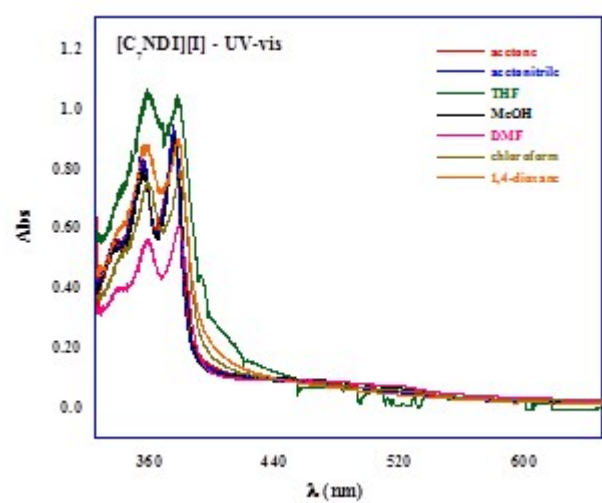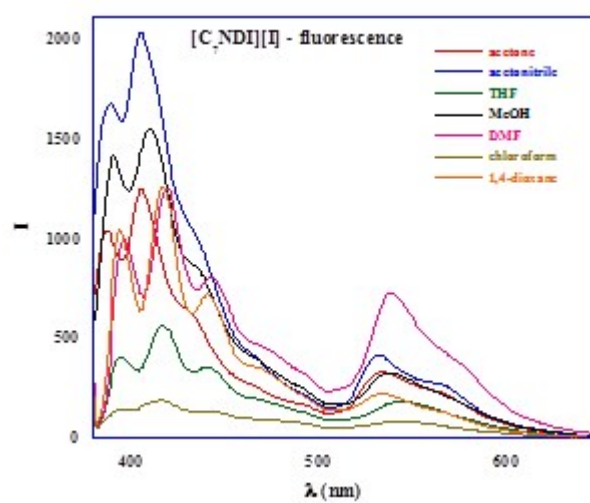

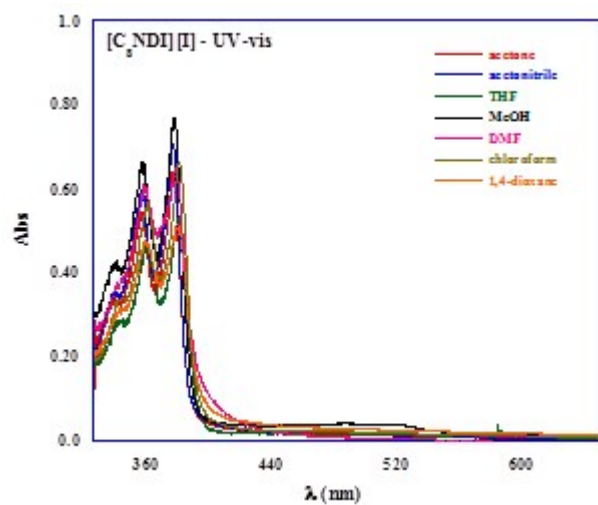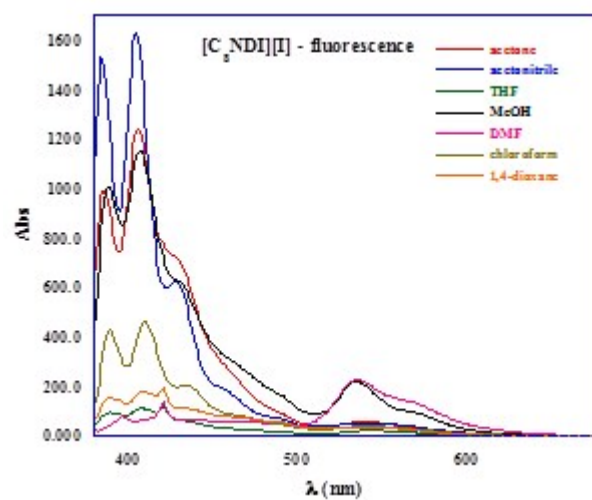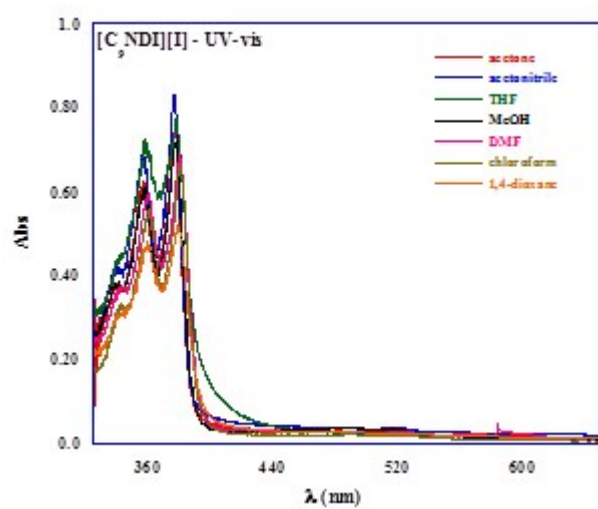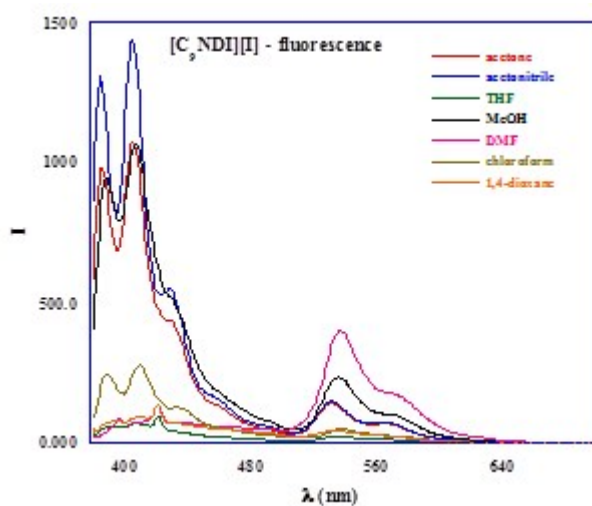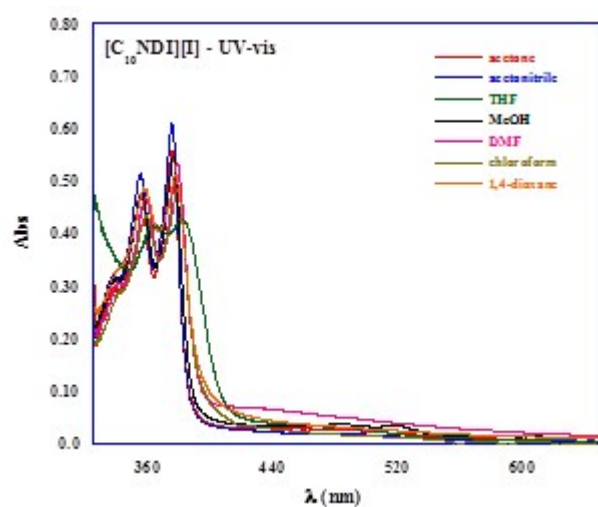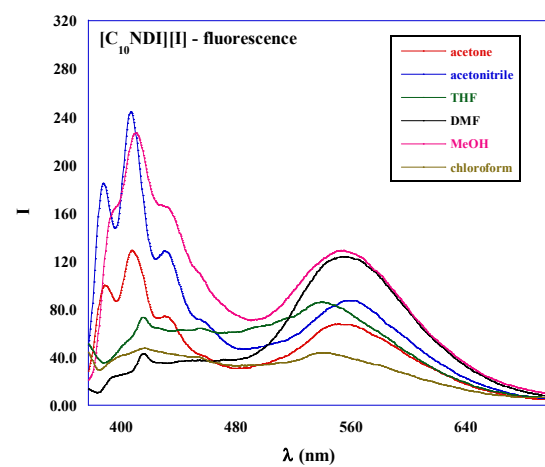

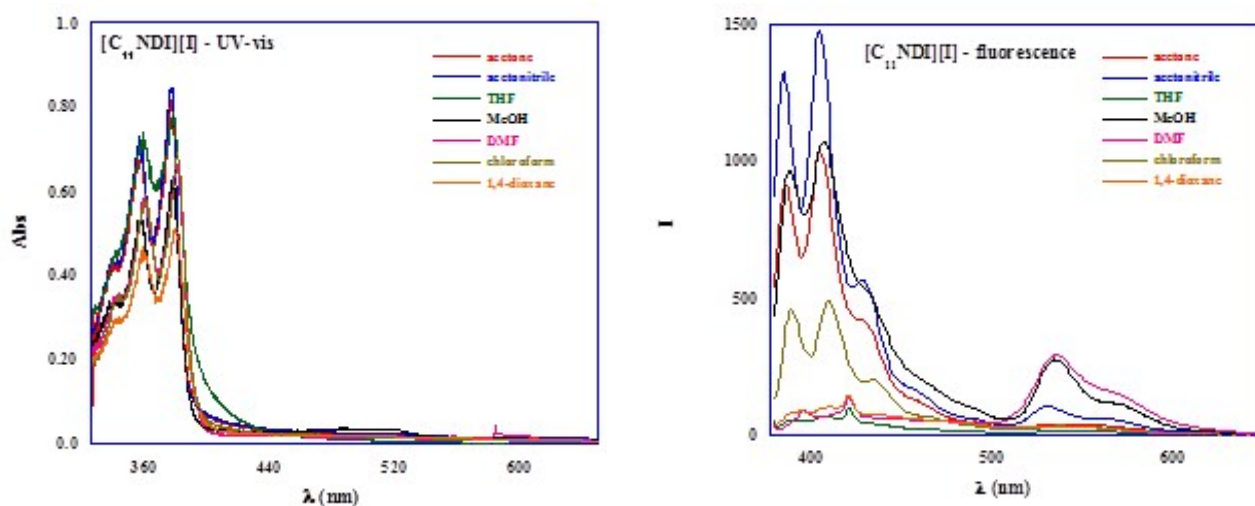

**Figure S2.** UV-vis and fluorescence spectra of salts as function of solvent. Fluorescence intensities are in arbitrary units.

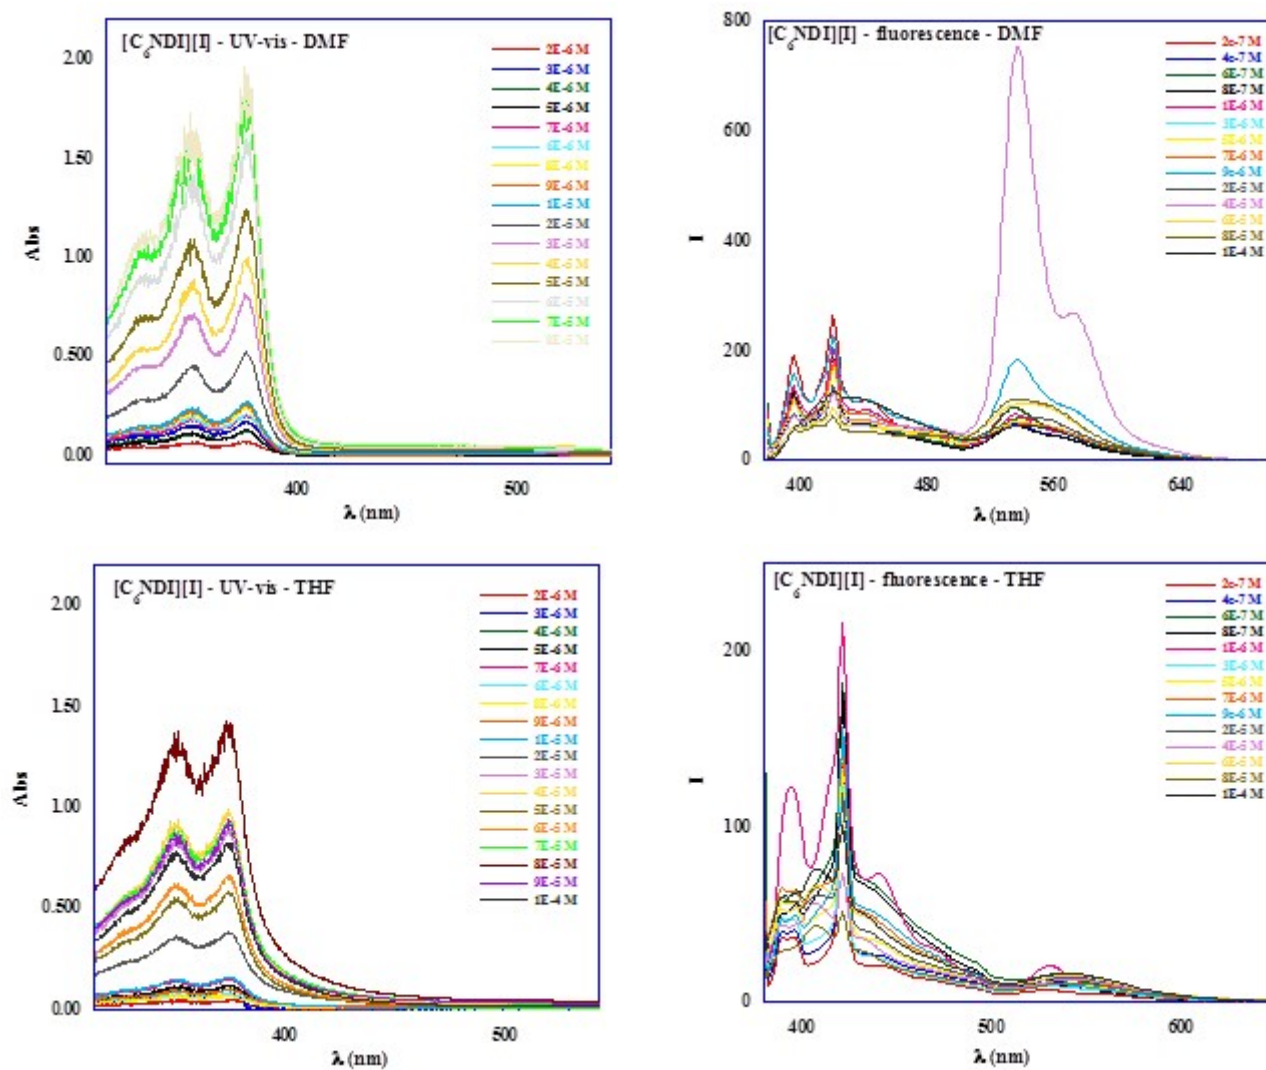

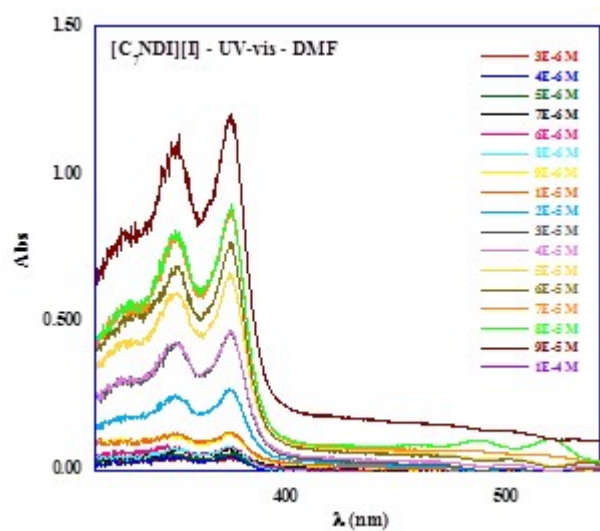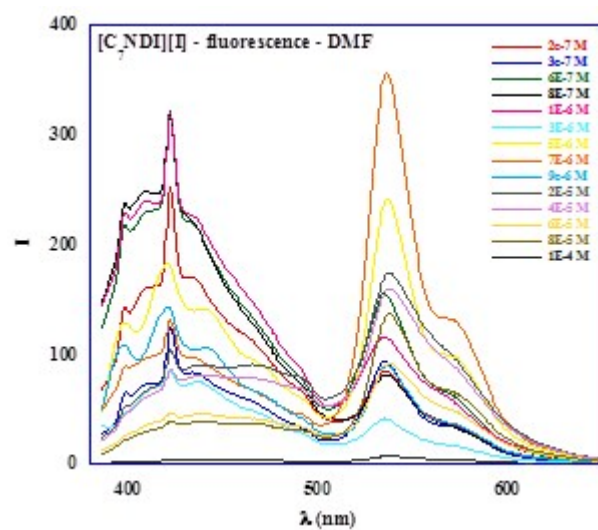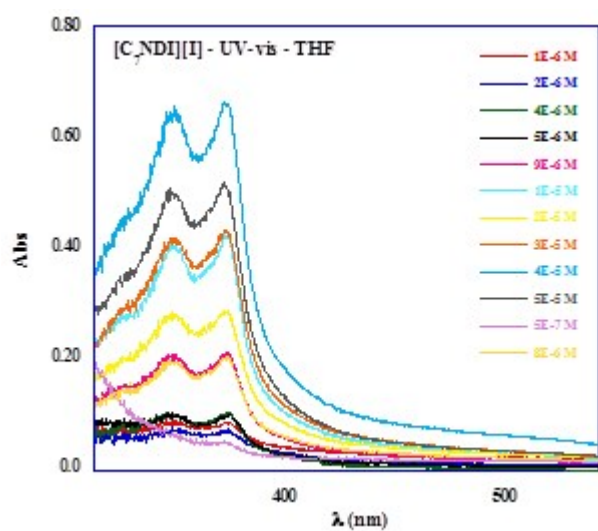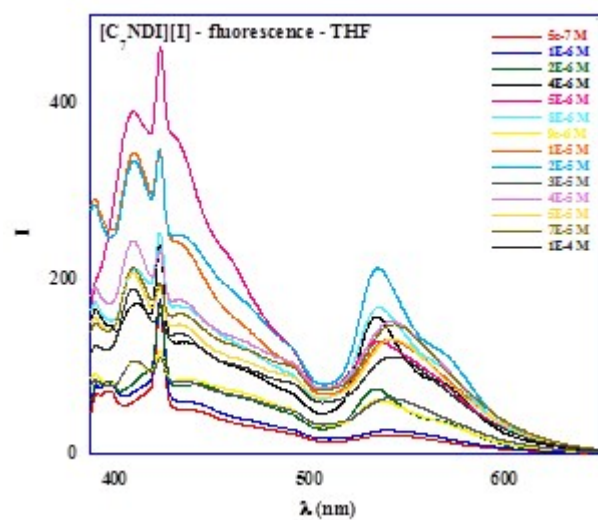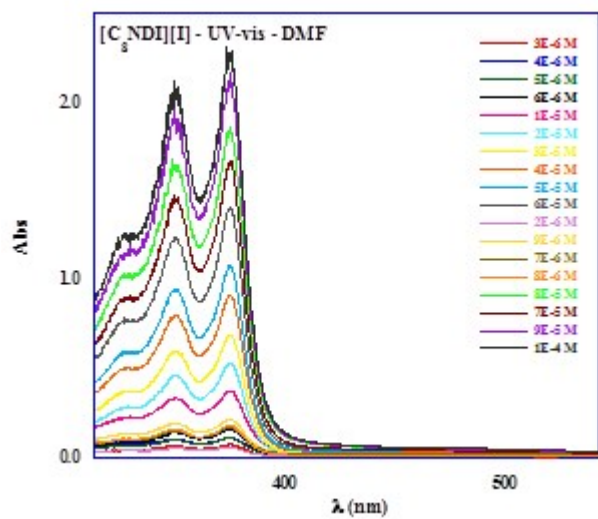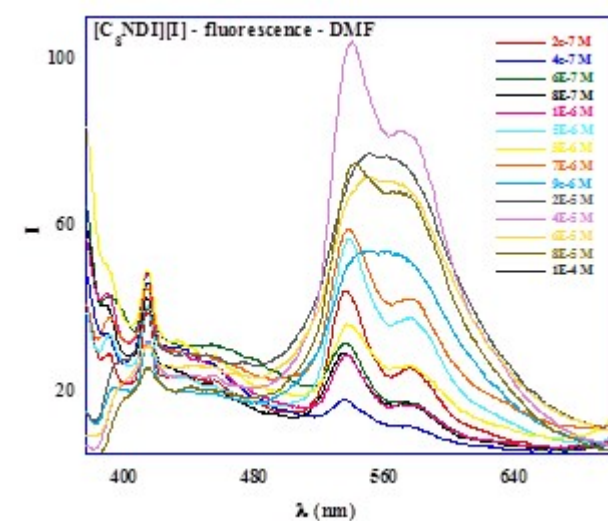

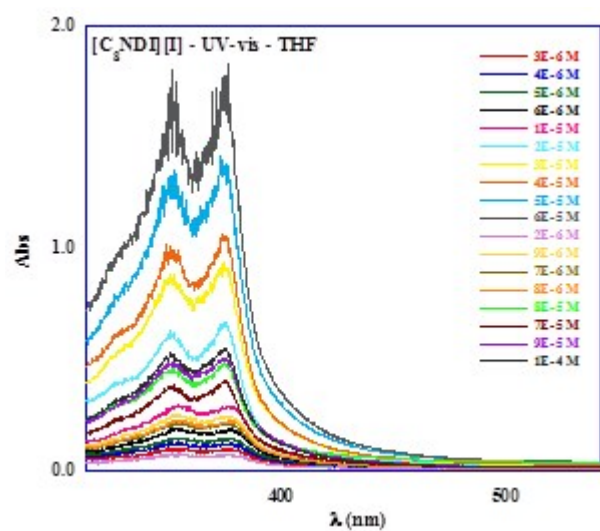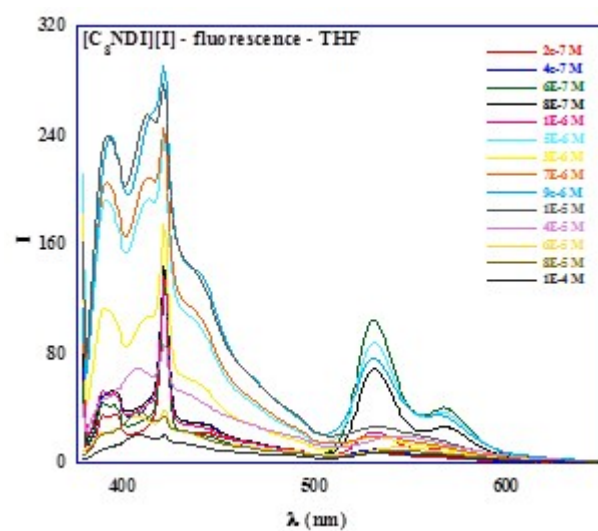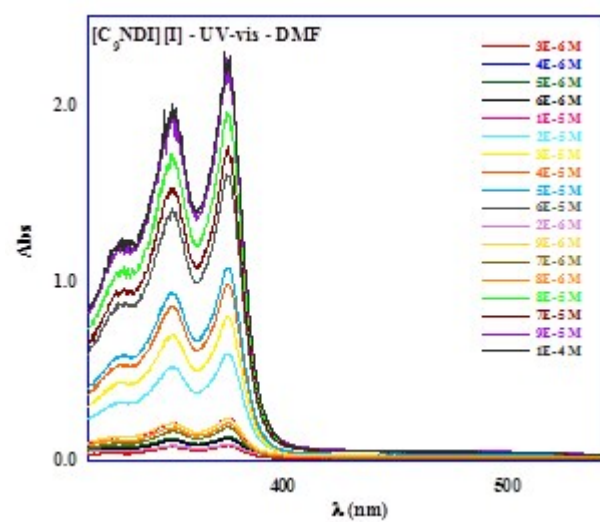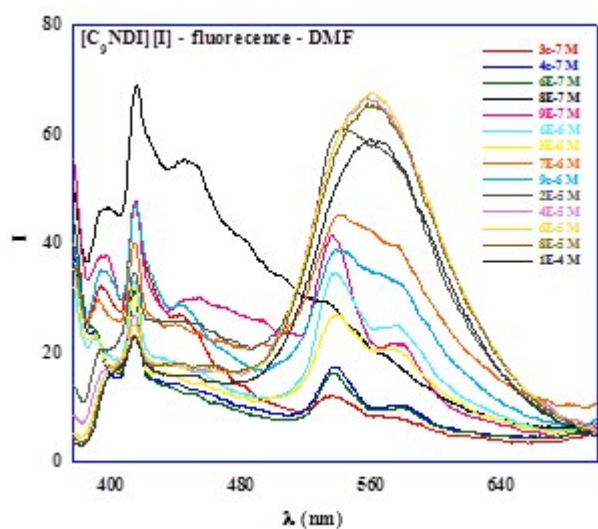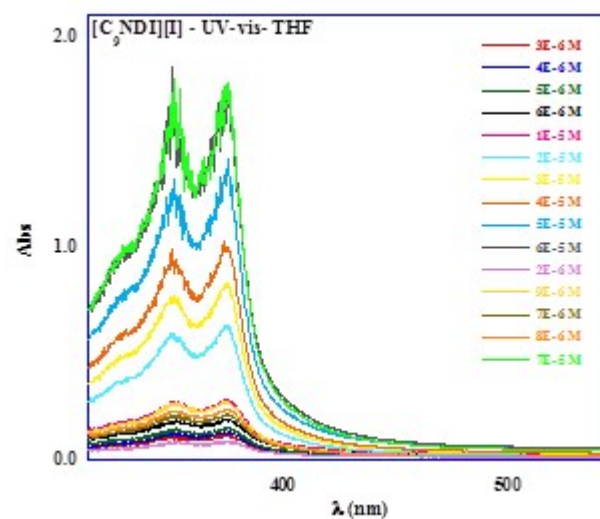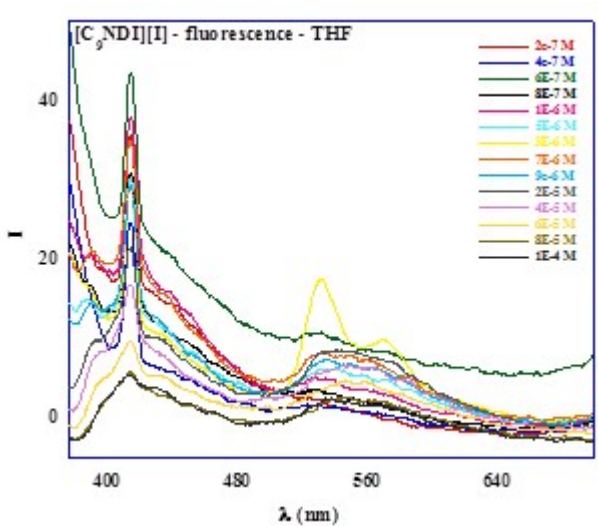

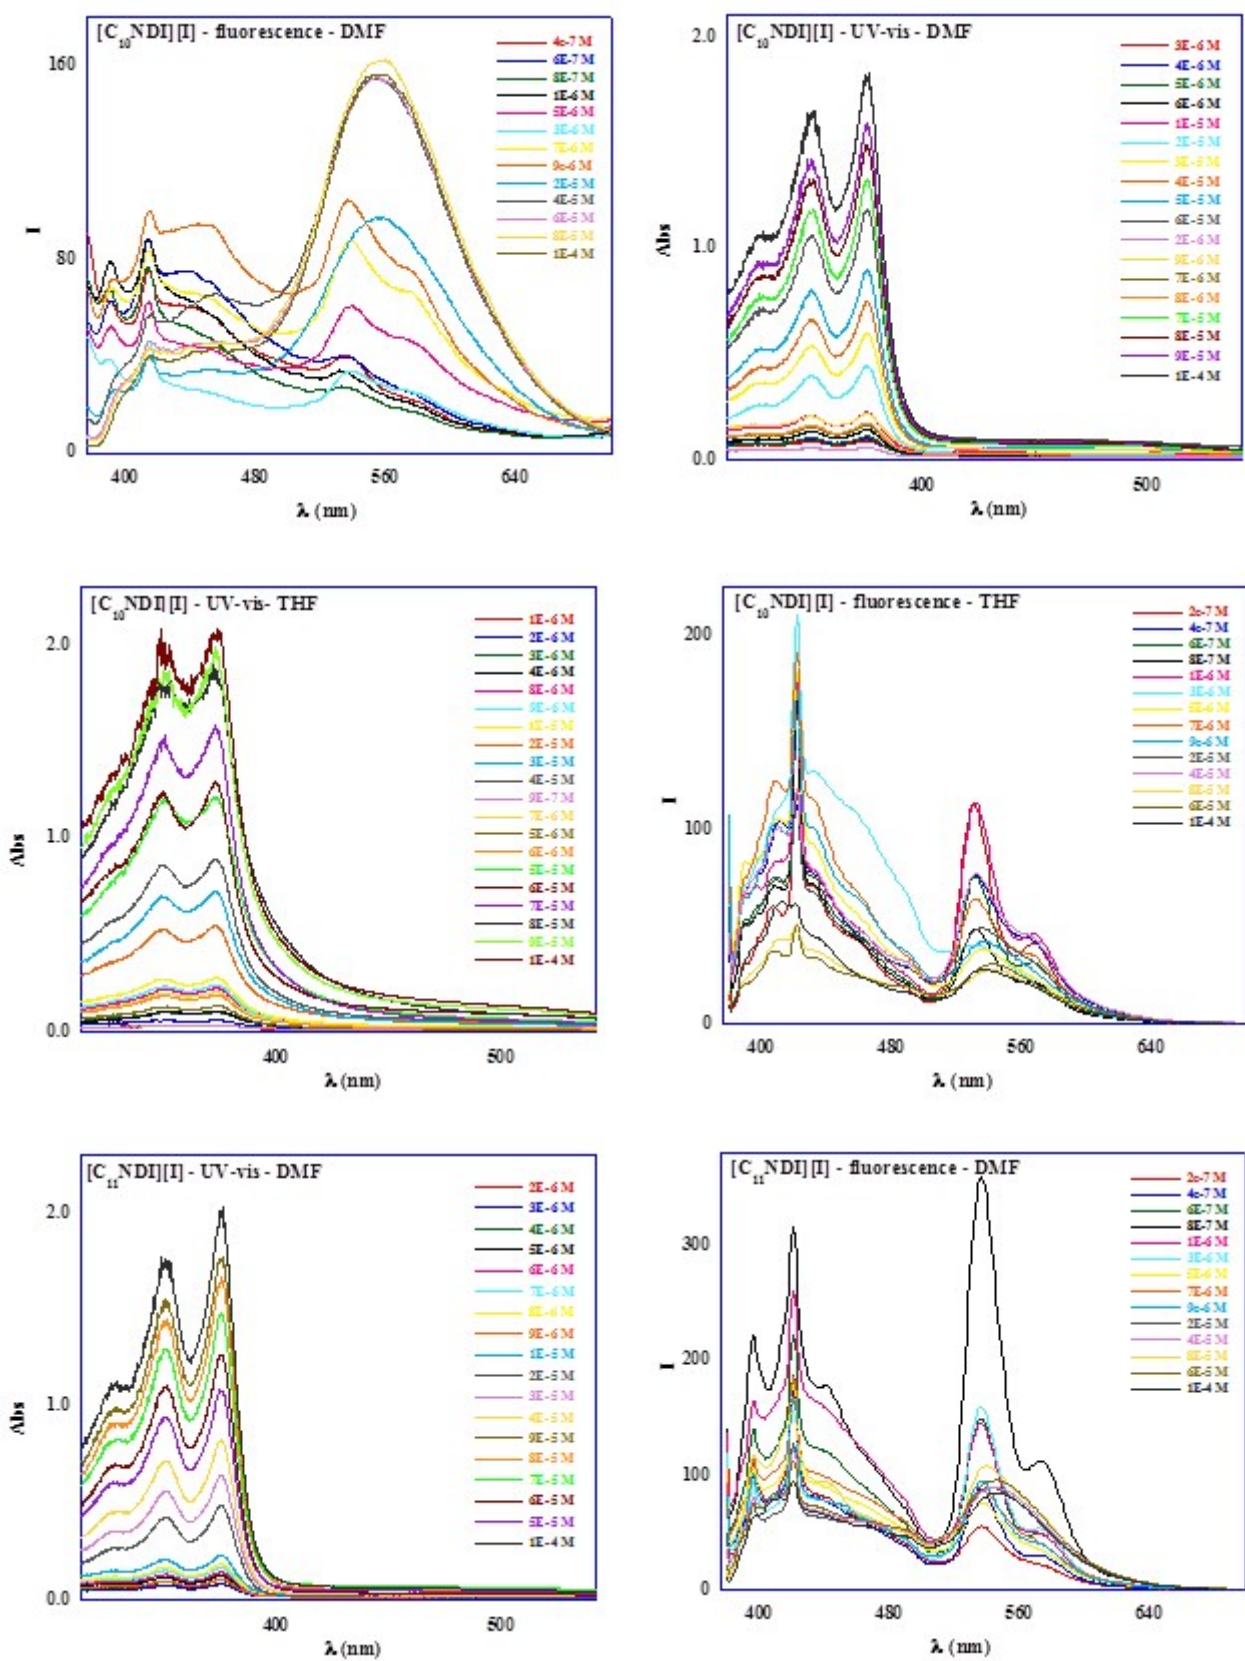

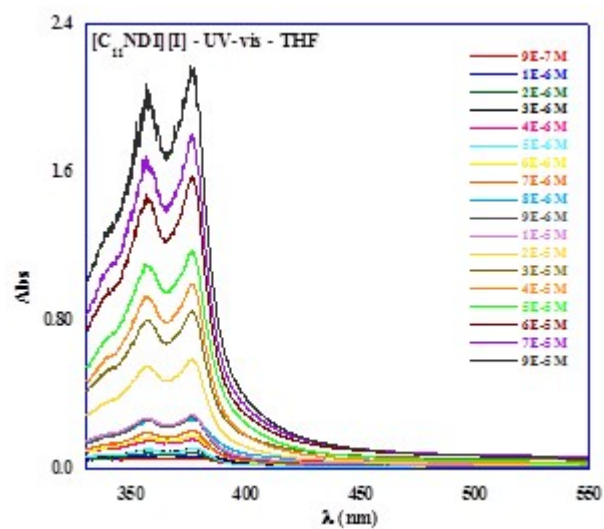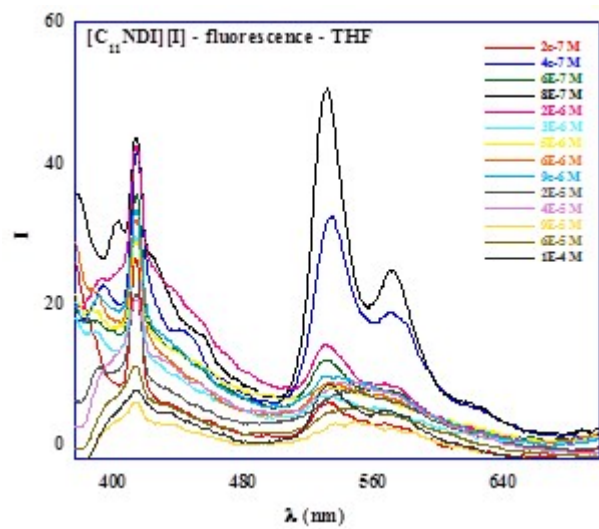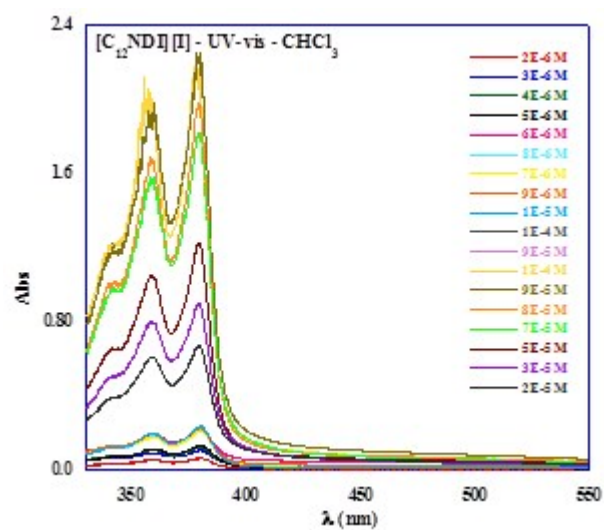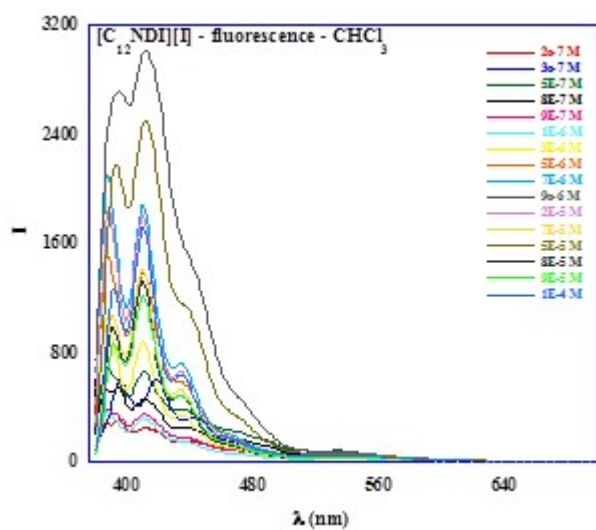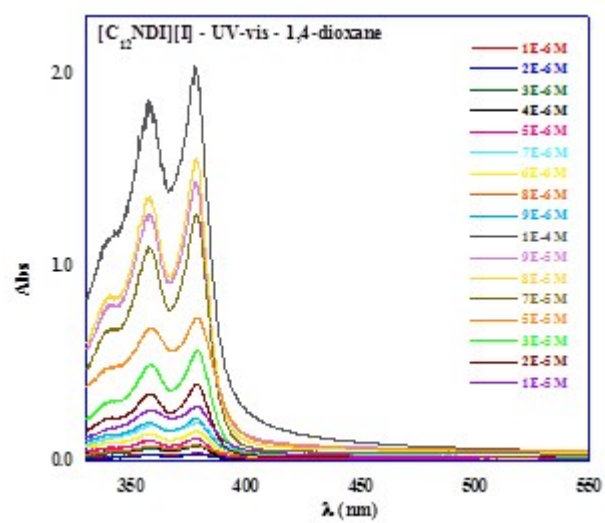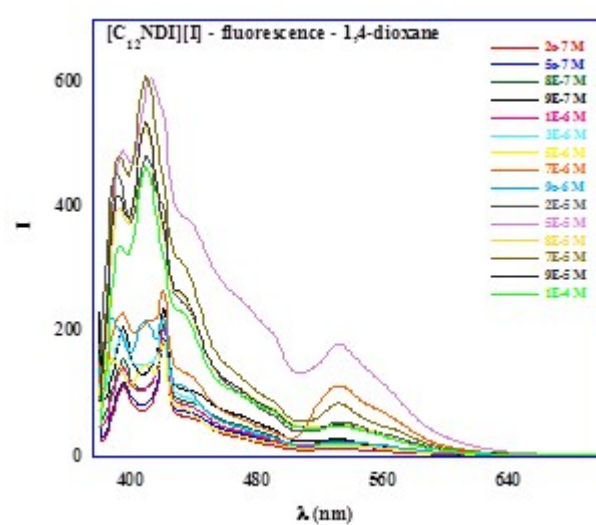

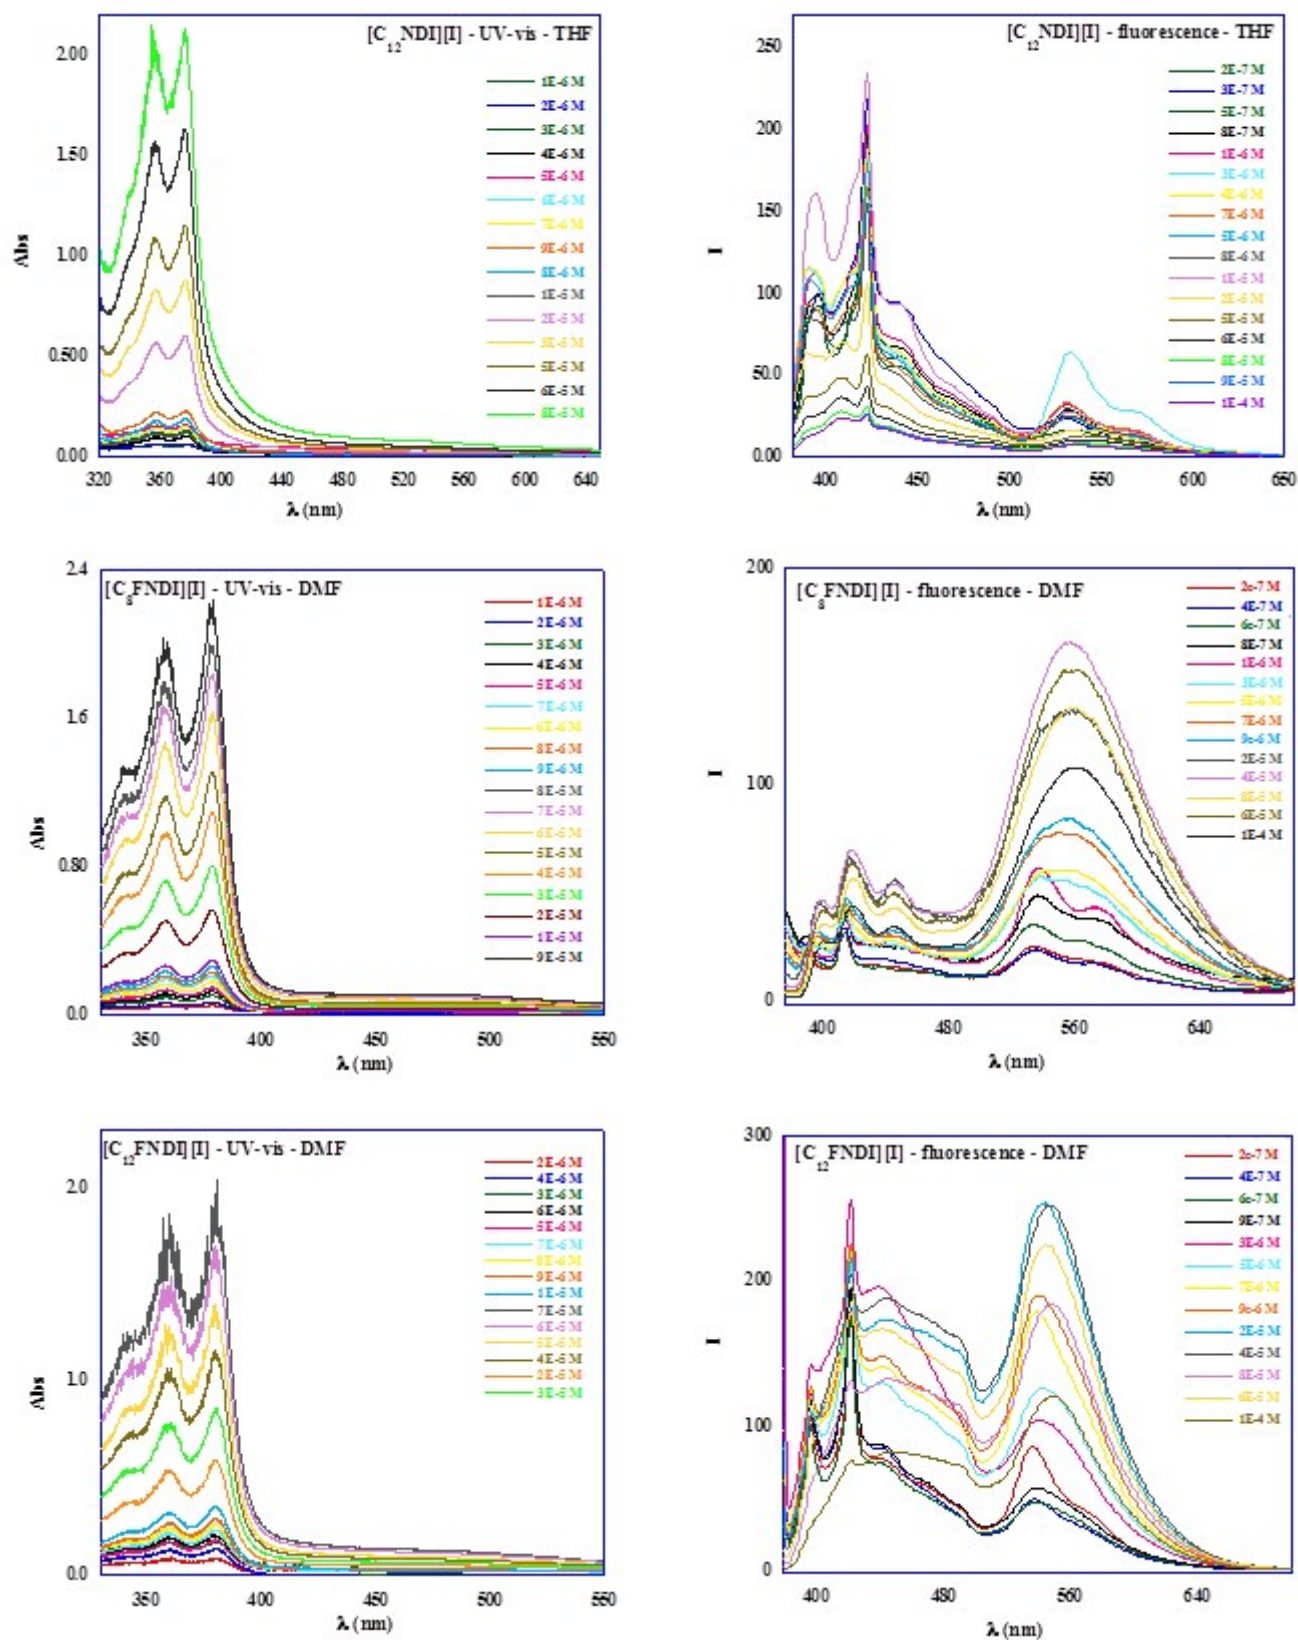

**Figure S3.** UV-vis and fluorescence ( $\lambda_{ex} = 362$  nm) of salts as a function of concentration and solvent. Fluorescence intensities are in arbitrary units.

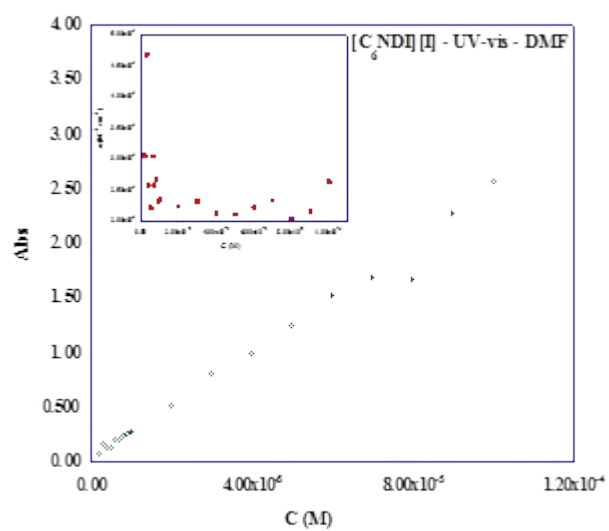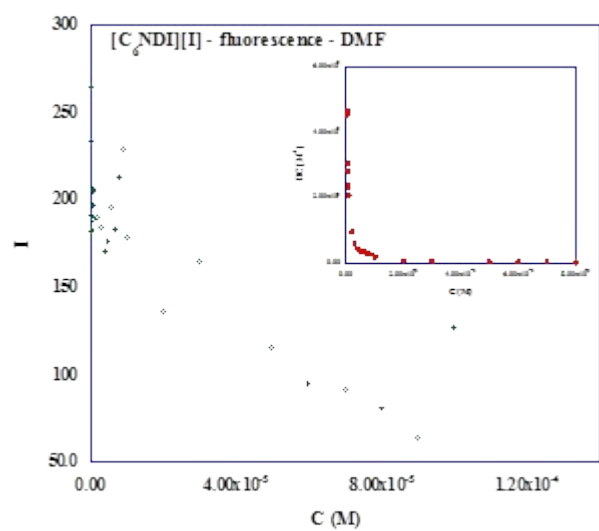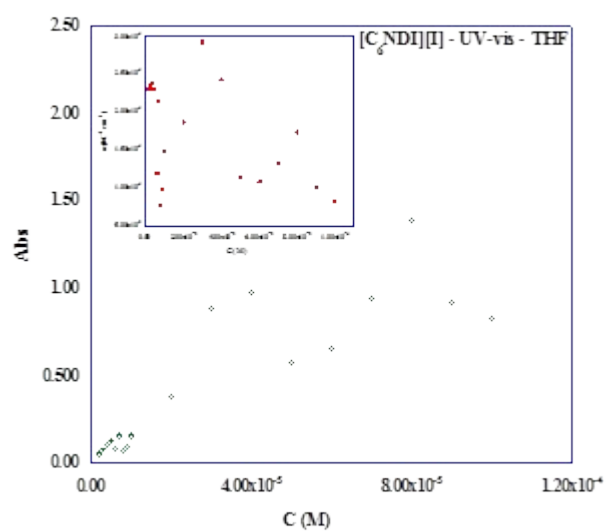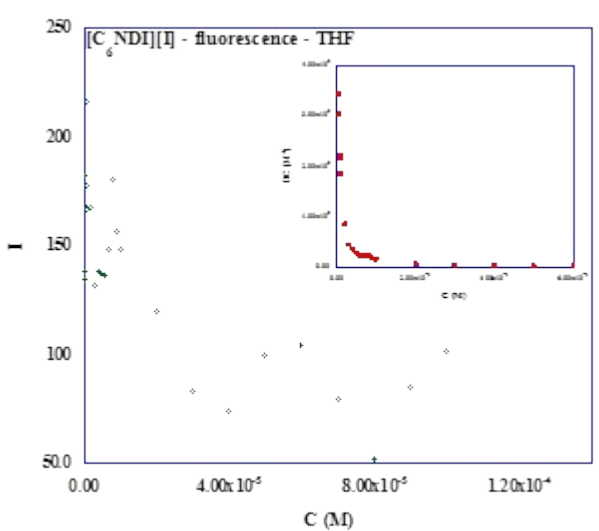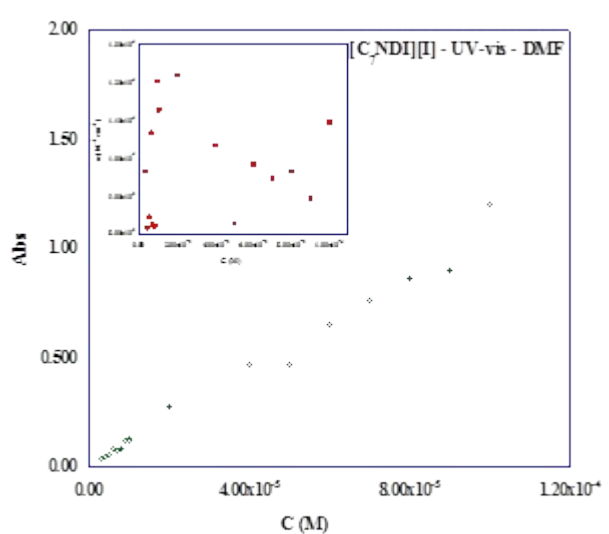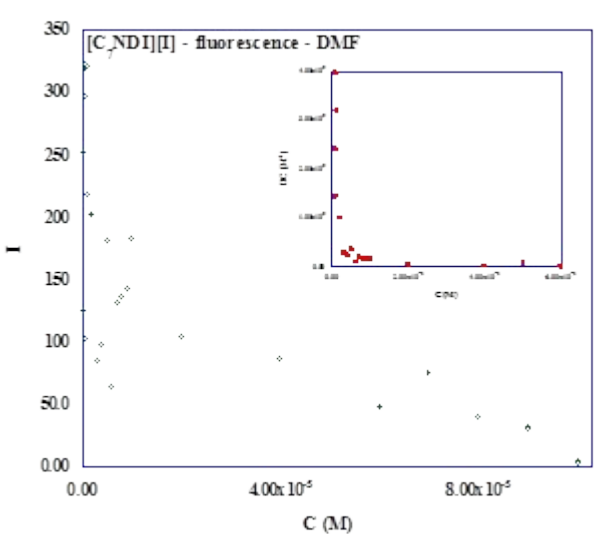

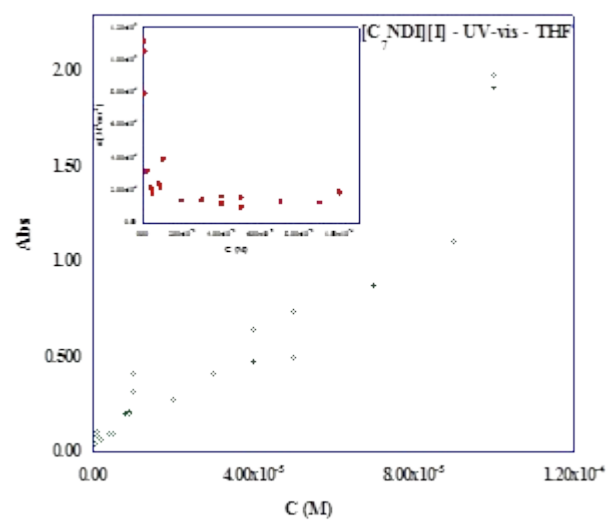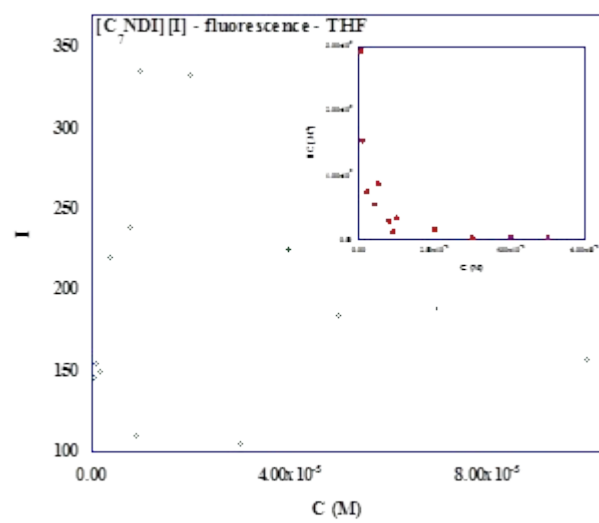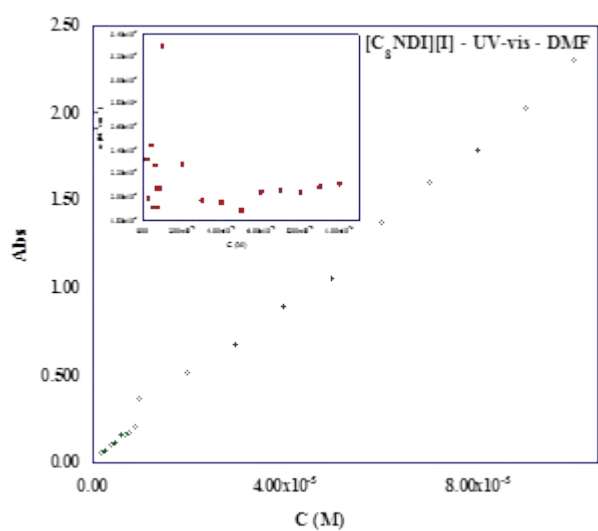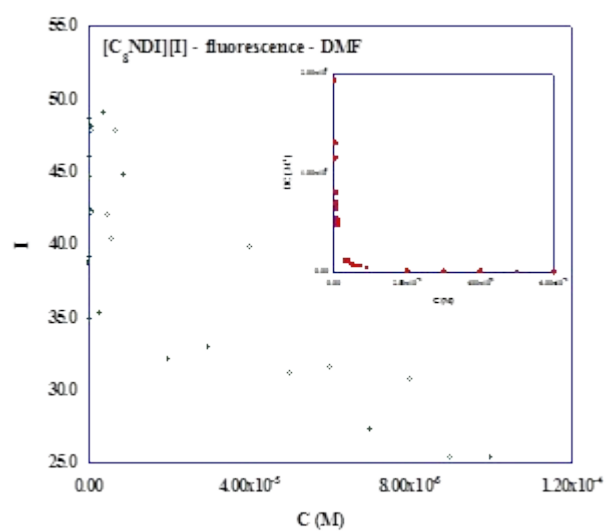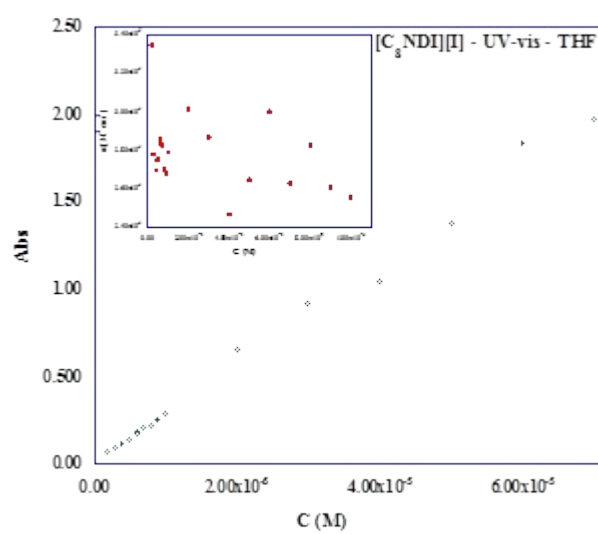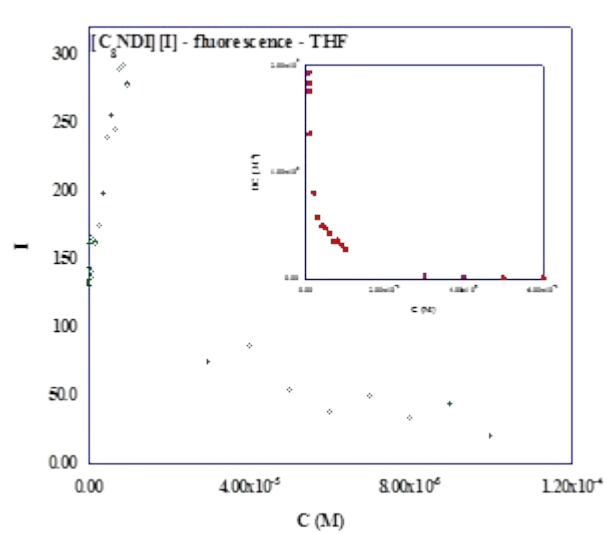

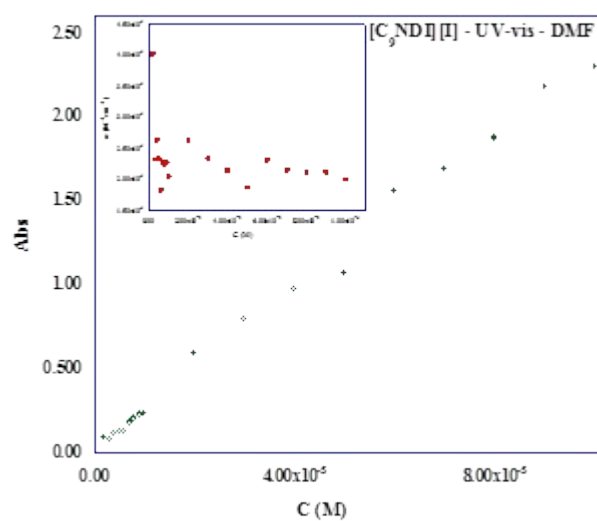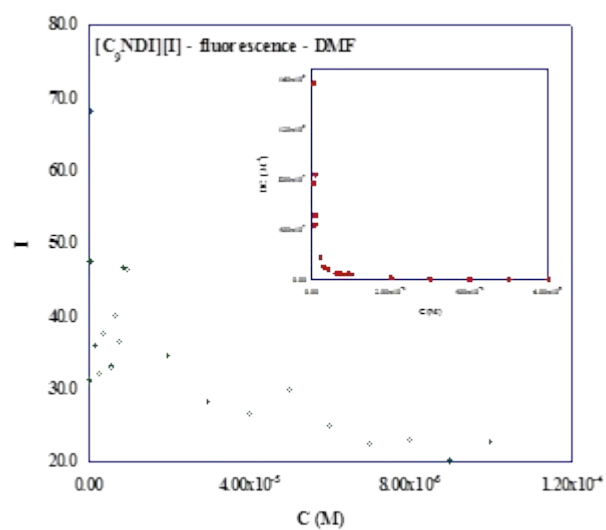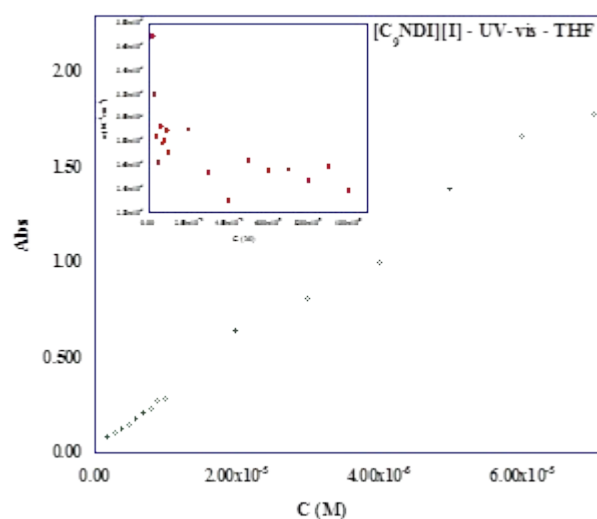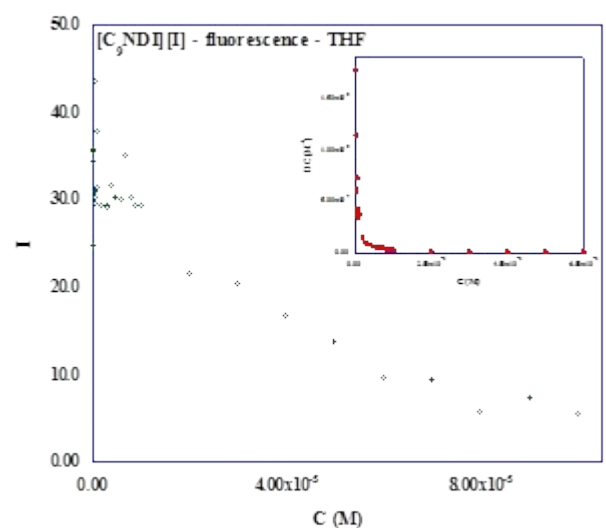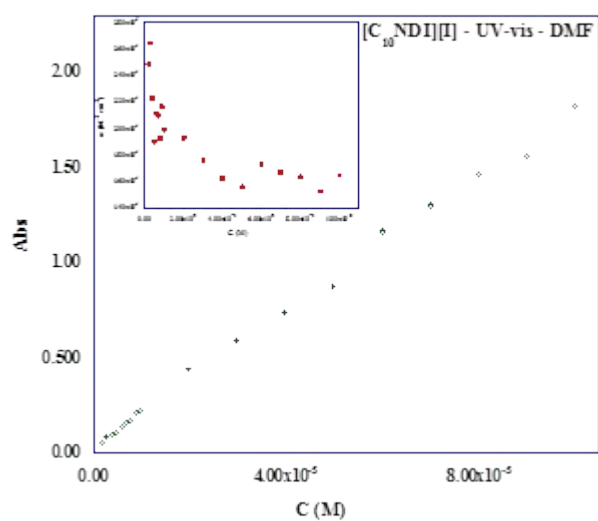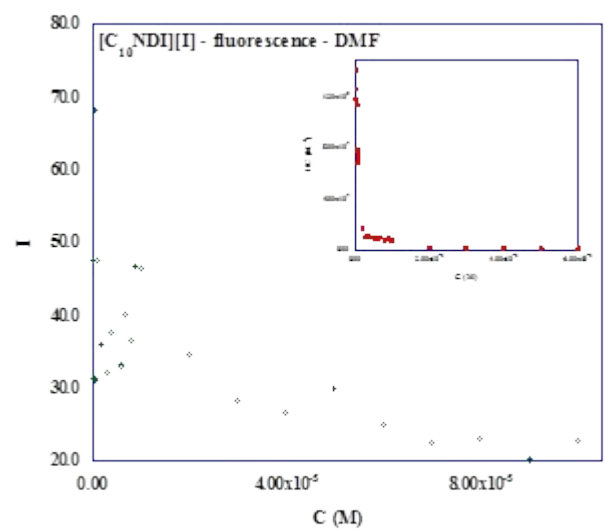

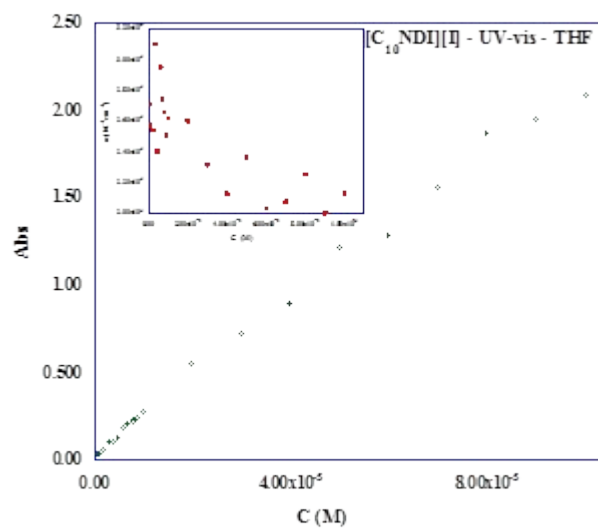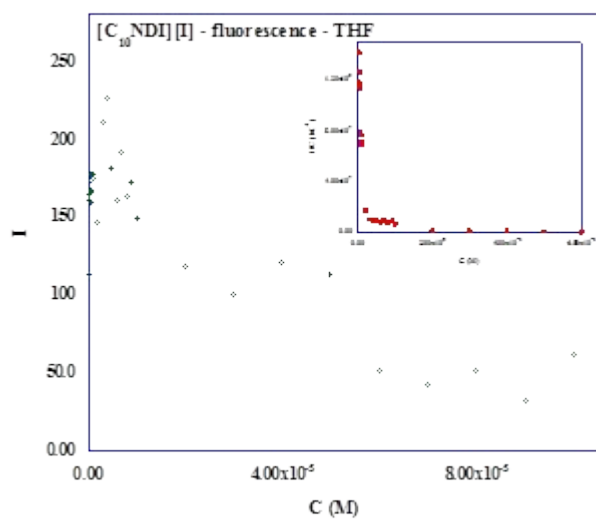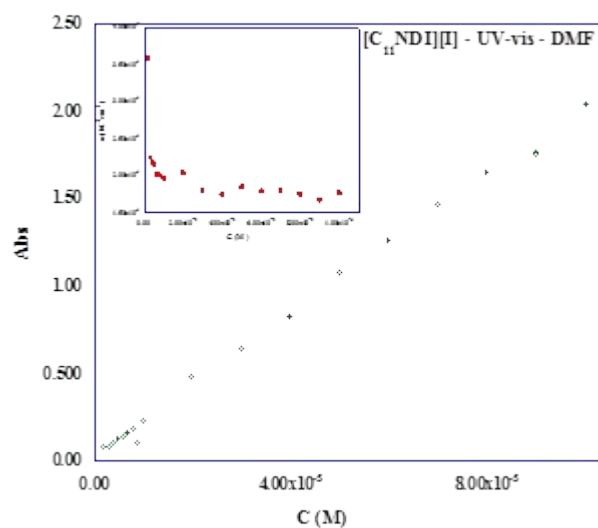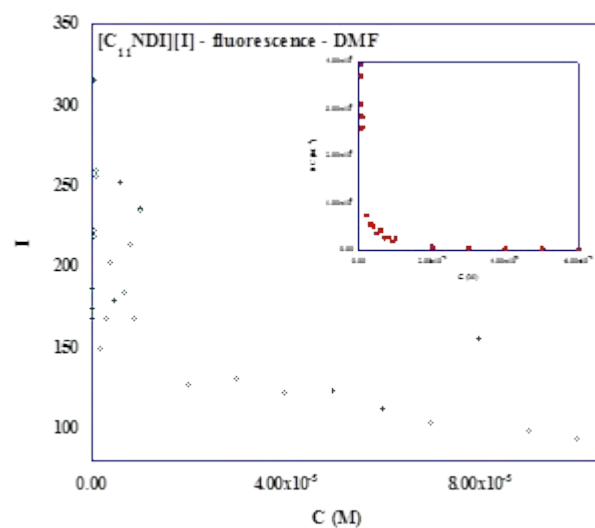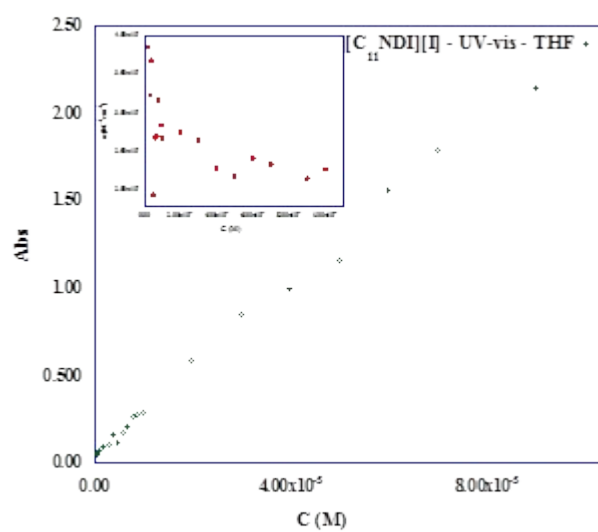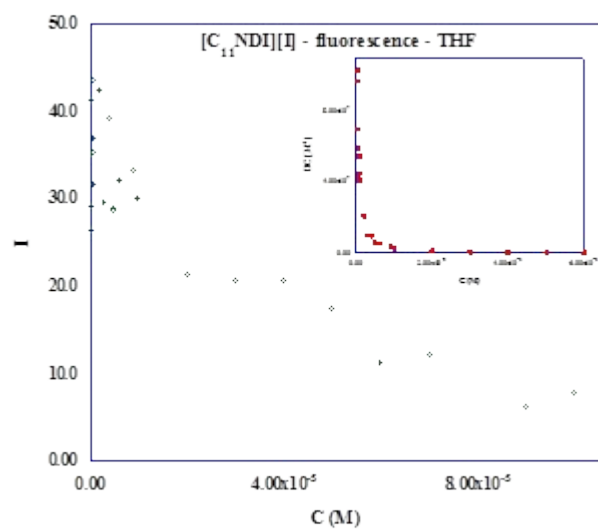

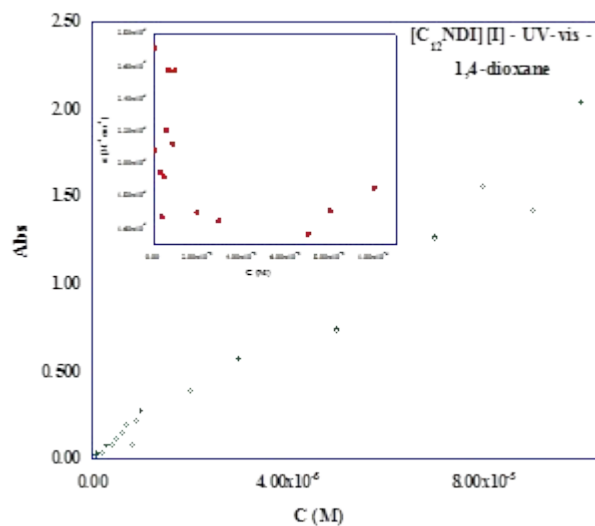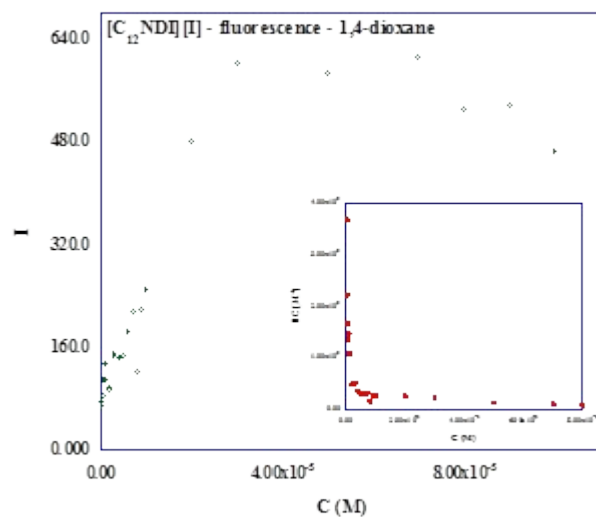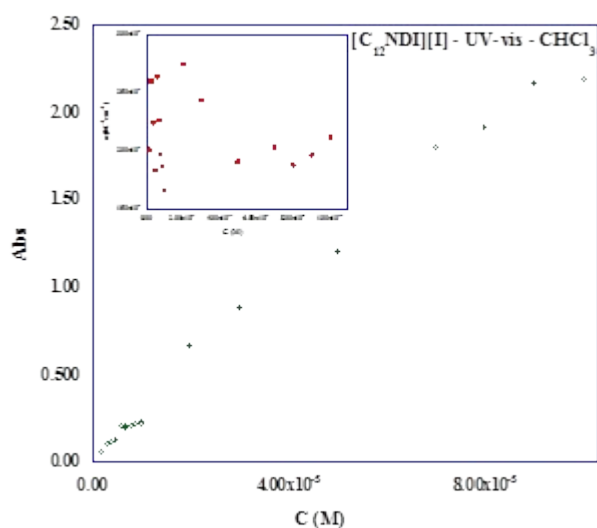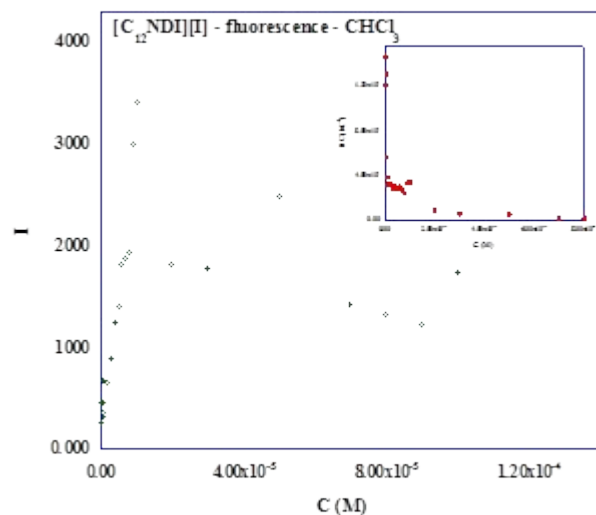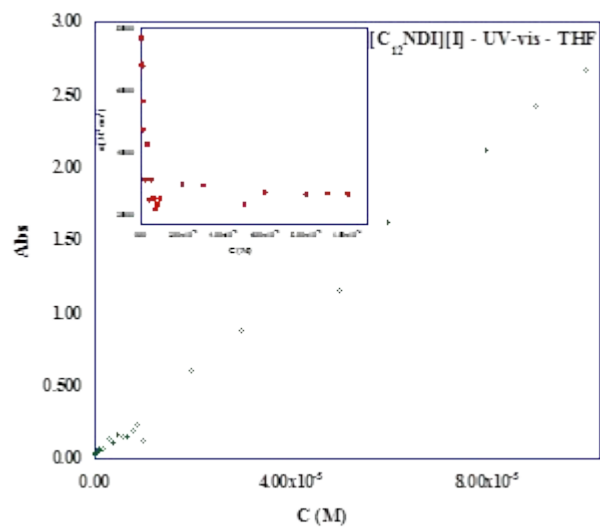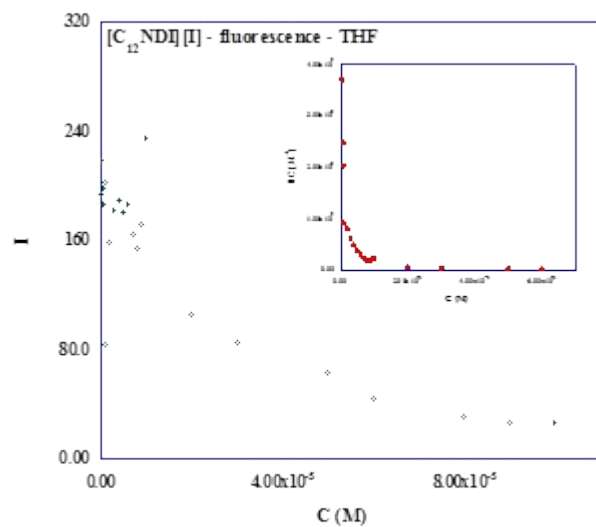

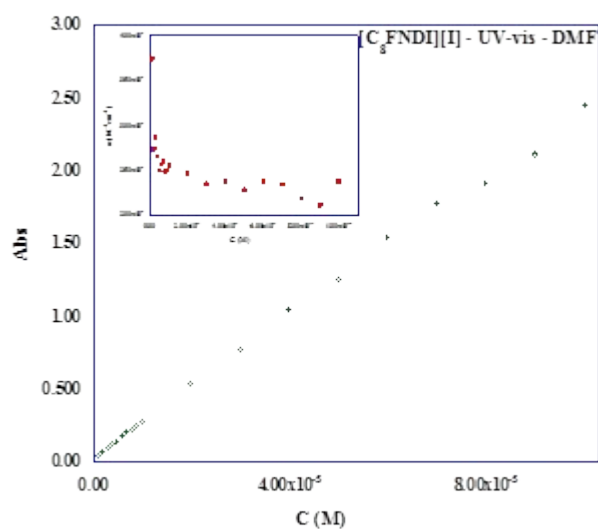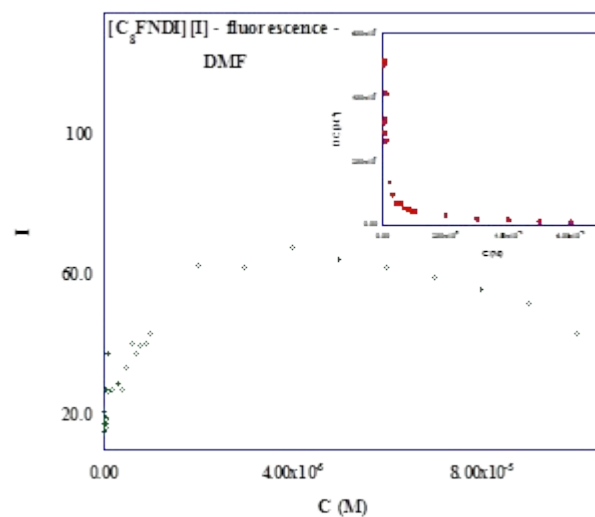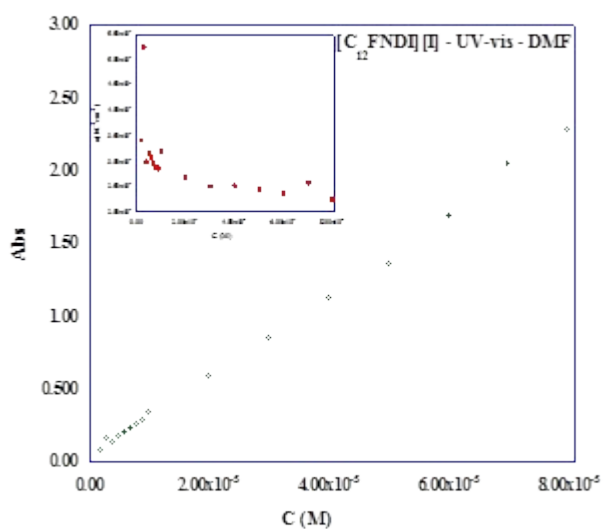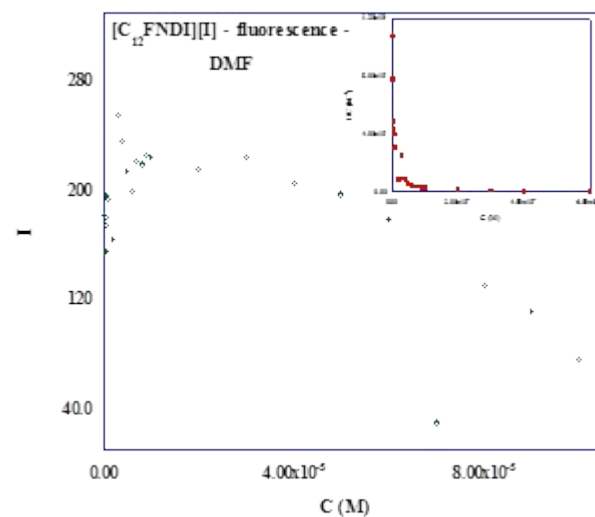

**Figure S4.** Absorbance and fluorescence intensity (arbitrary units) as a function of concentration and solvent. (Inset: trend of  $\epsilon$  as a function of concentration; trend of  $I/C$  as function of concentration).  $I/C$  values were determined at 415 nm for  $[C_8\text{NDI}][I]$  in DMF,  $[C_{10}\text{NDI}][I]$  in THF and DMF. Moreover,  $I/C$  was determined at 533 nm for  $[C_{12}\text{NDI}][I]$  in dioxane, 435 nm  $[C_{12}\text{NDI}][I]$  in  $\text{CHCl}_3$  and at 422 nm in all other cases.

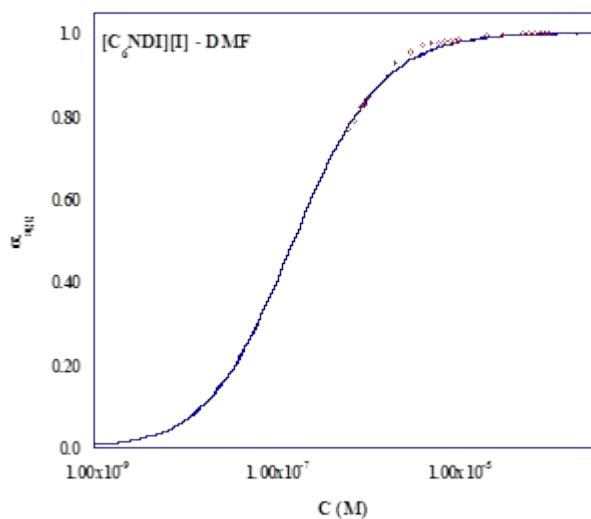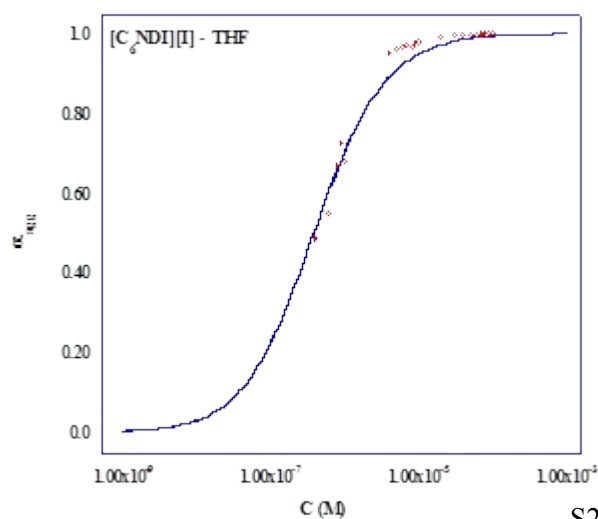

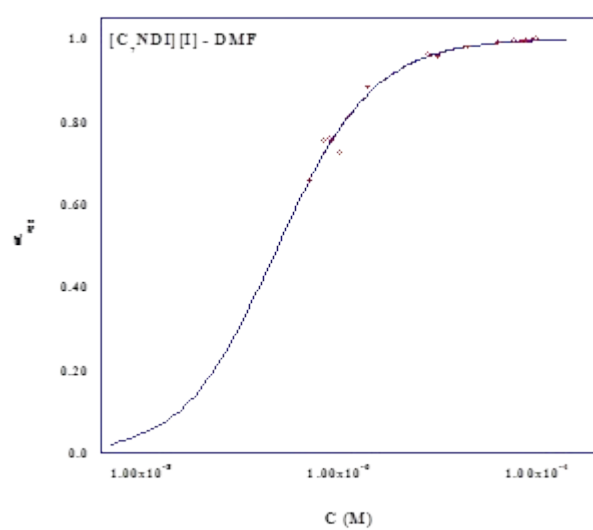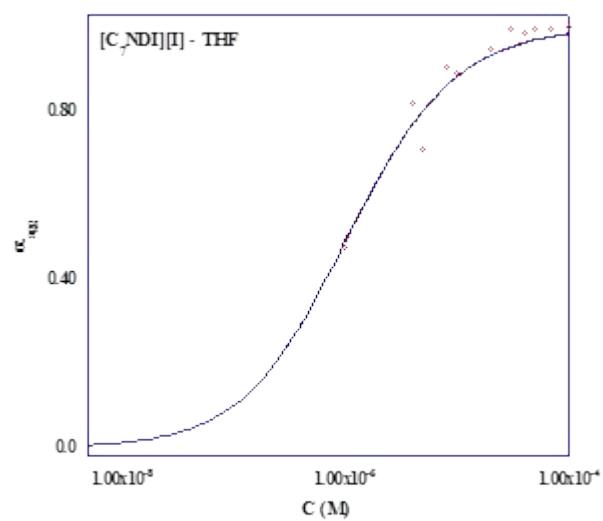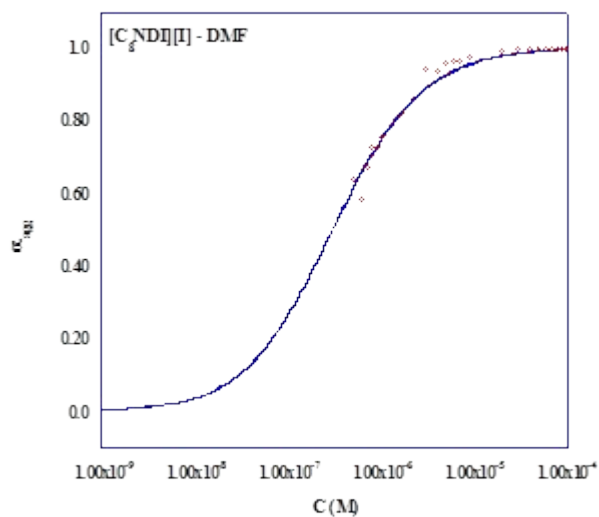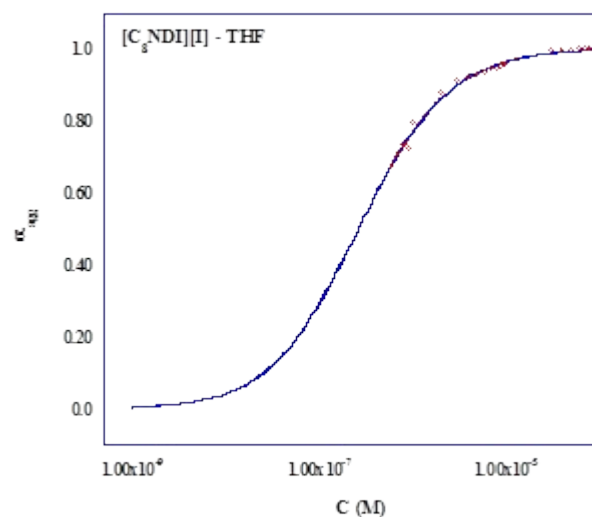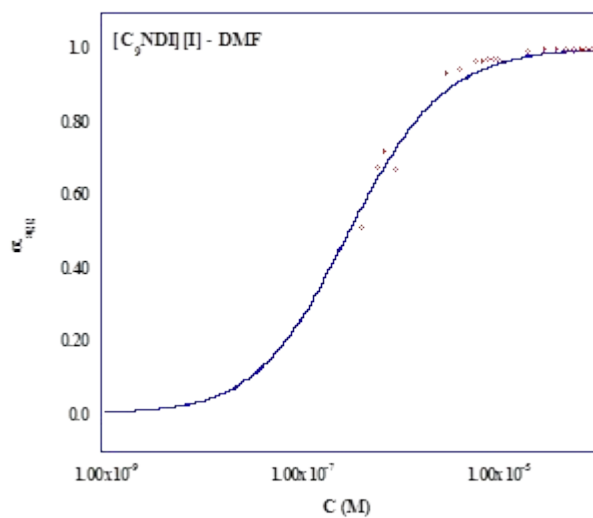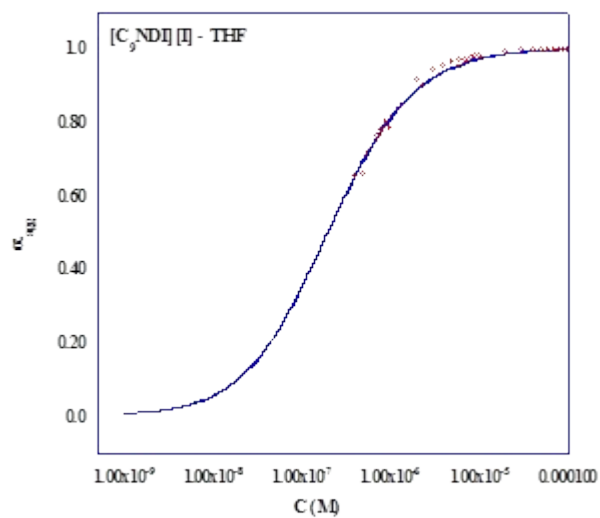

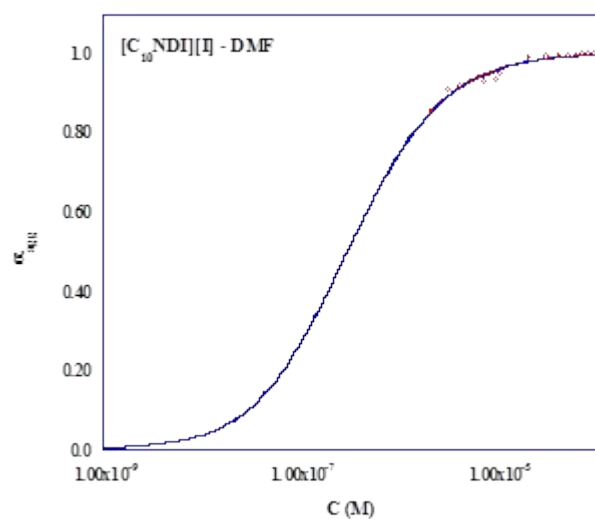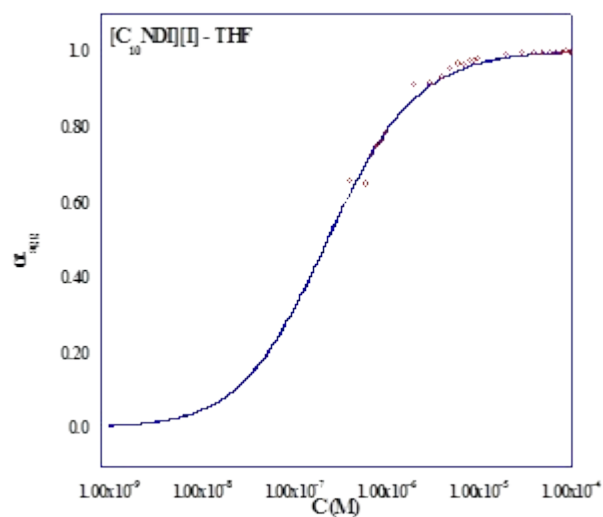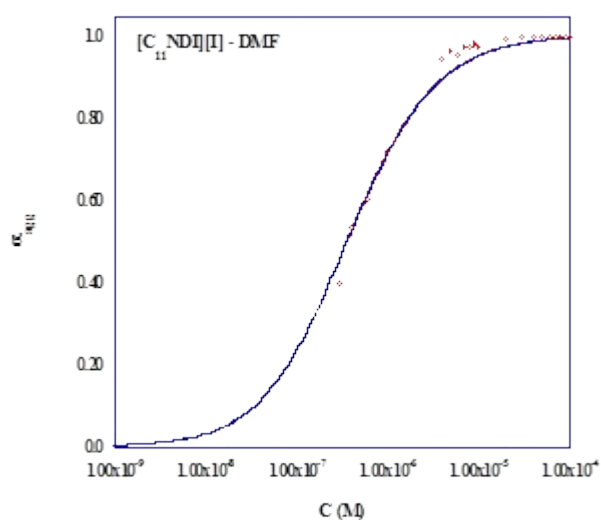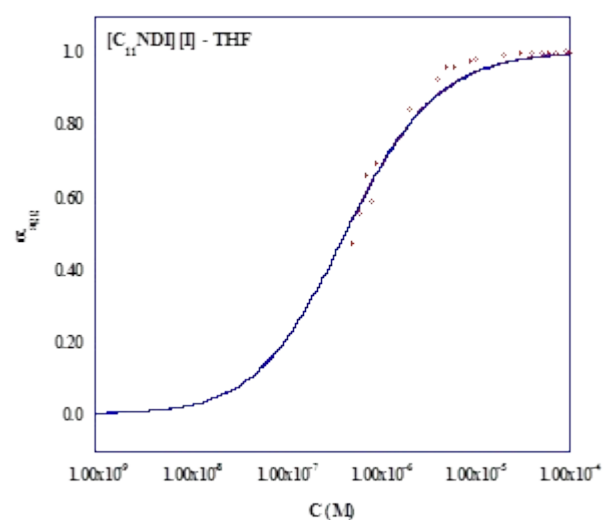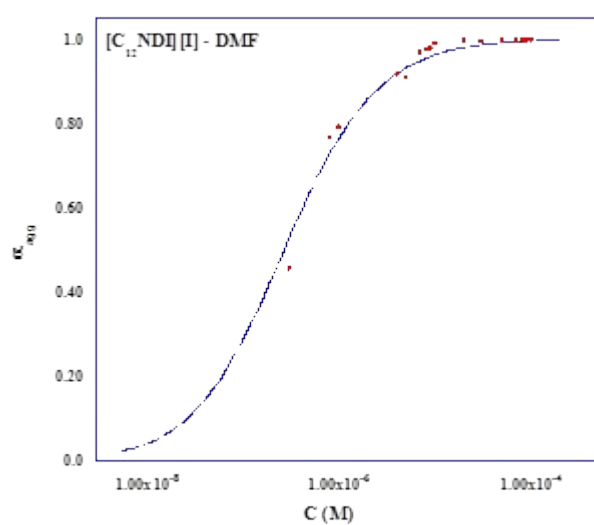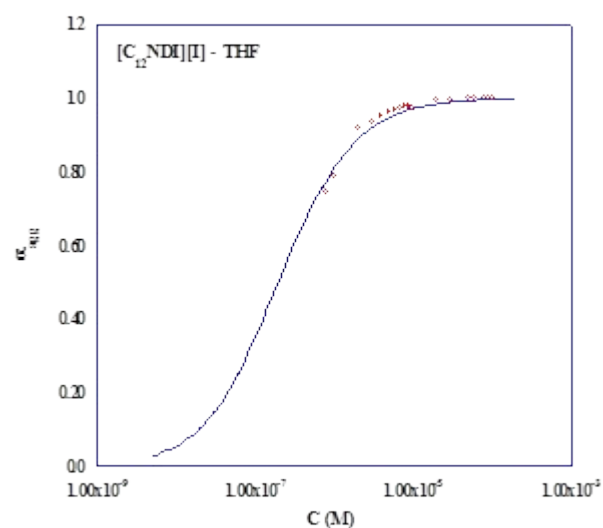

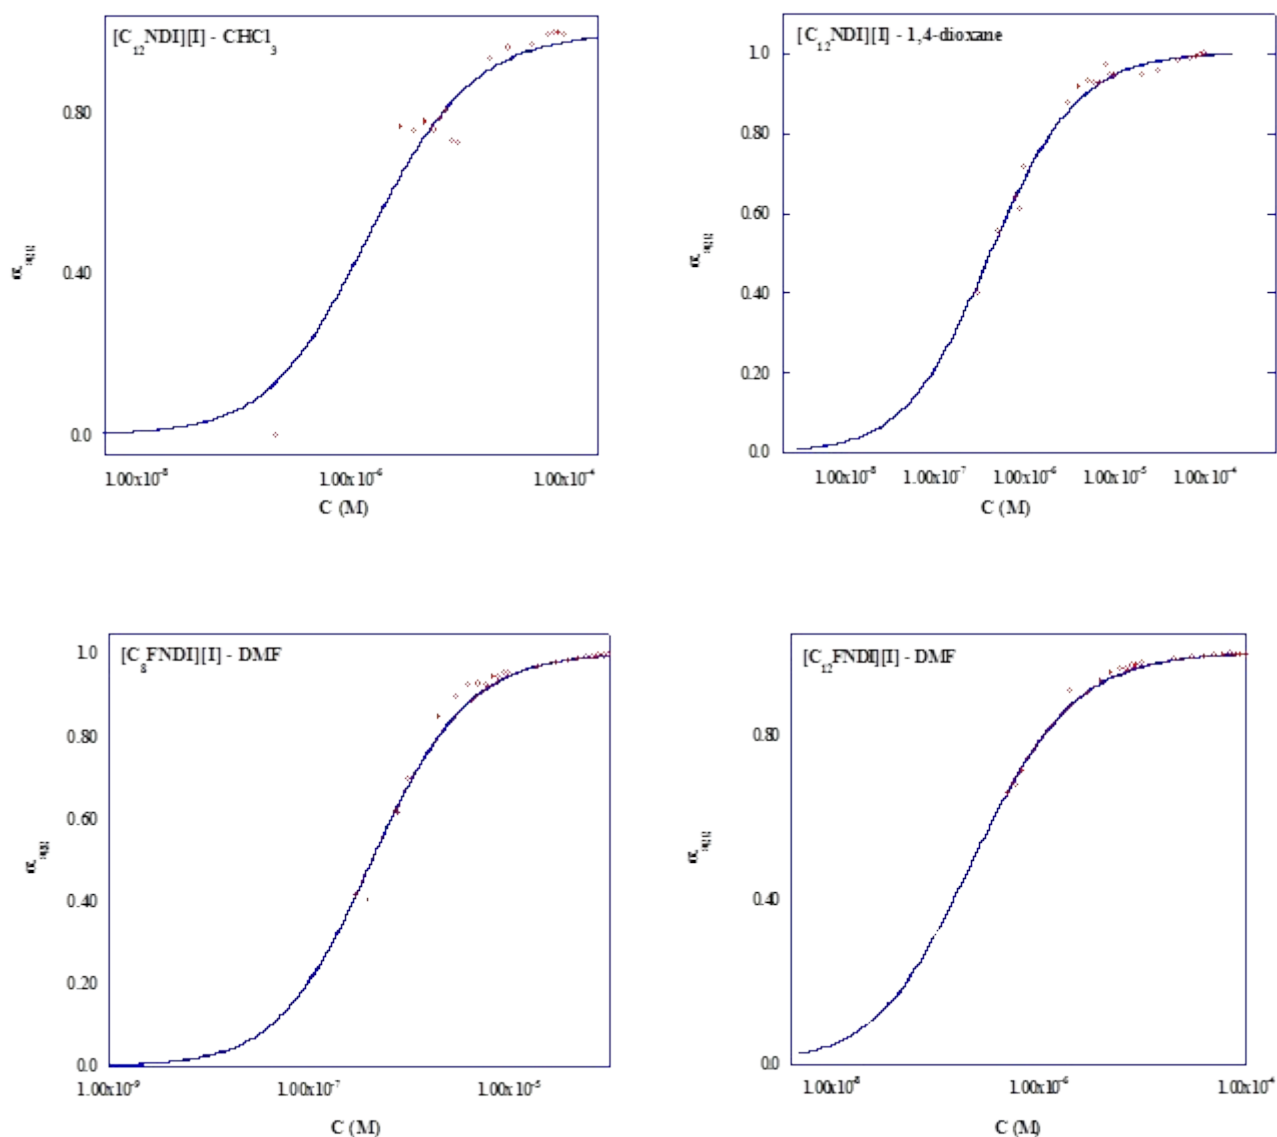

**Figure S5.** Plot of  $\alpha_{agg}$  as a function of concentration and solvent.  $\alpha_{agg}$  was determined at 415 nm for [C<sub>8</sub>NDI][I] in DMF, [C<sub>10</sub>NDI][I] in THF and DMF.  $\alpha_{agg}$  was determined at 533 nm for [C<sub>12</sub>NDI][I] in dioxane, at 435 nm at [C<sub>12</sub>NDI][I] in CHCl<sub>3</sub> and at 422 nm in all the other cases.

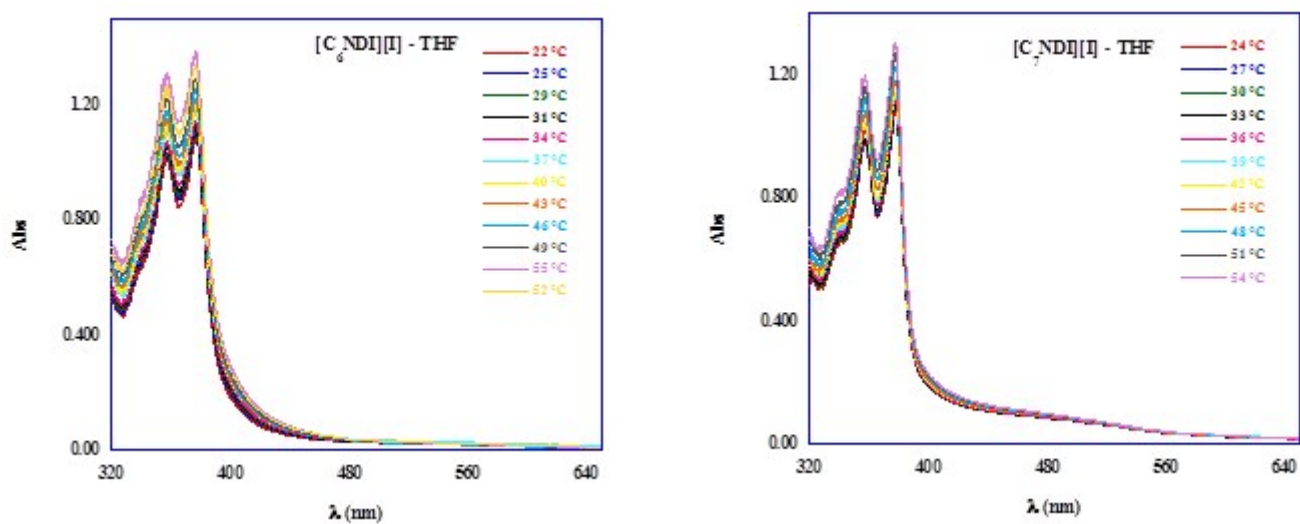

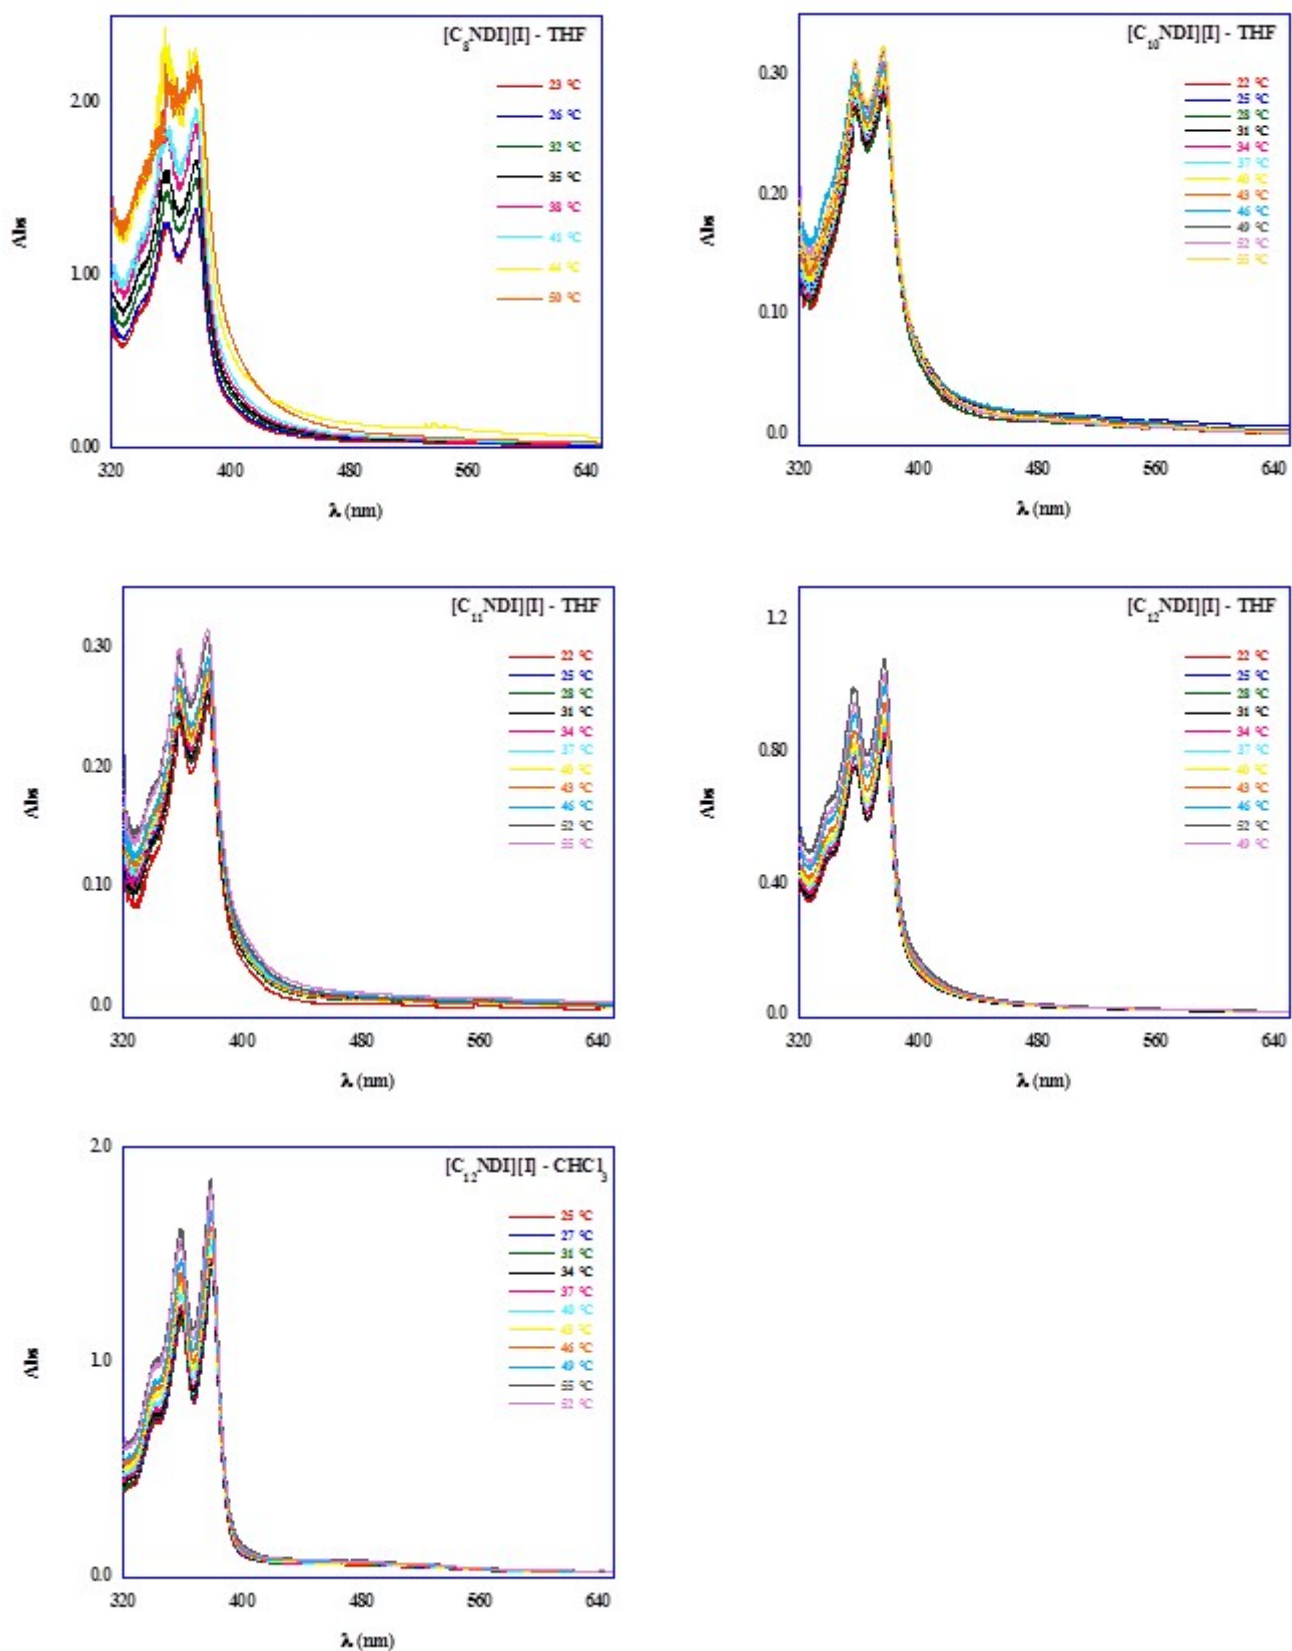

**Figure S6.** UV-vis spectra at fixed concentration ( $5 \cdot 10^{-5}$  M) as a function of temperature.

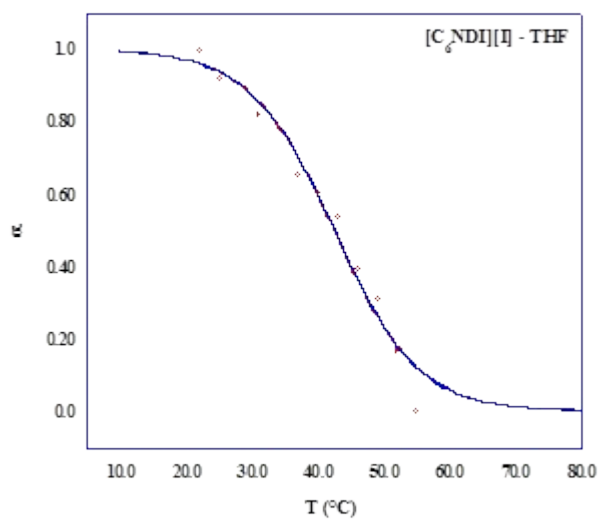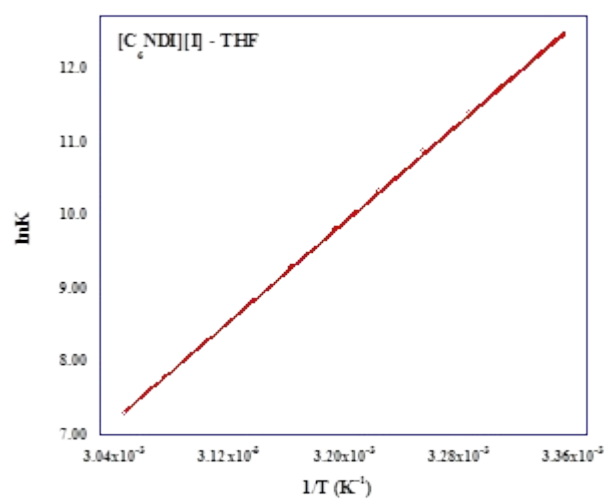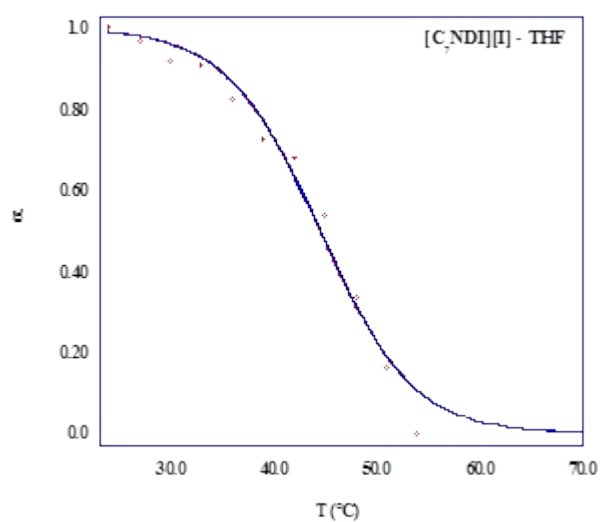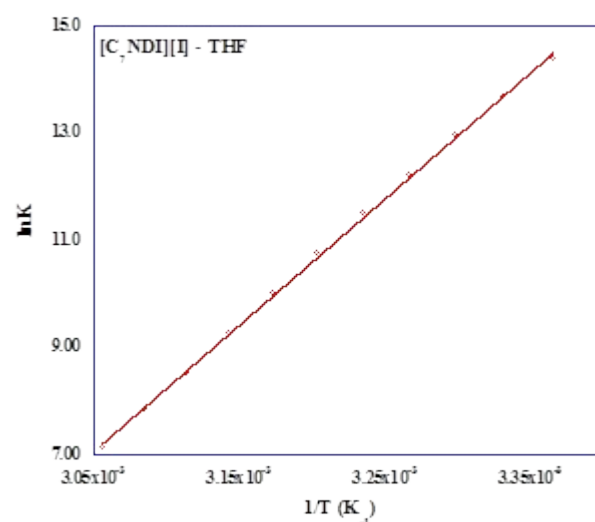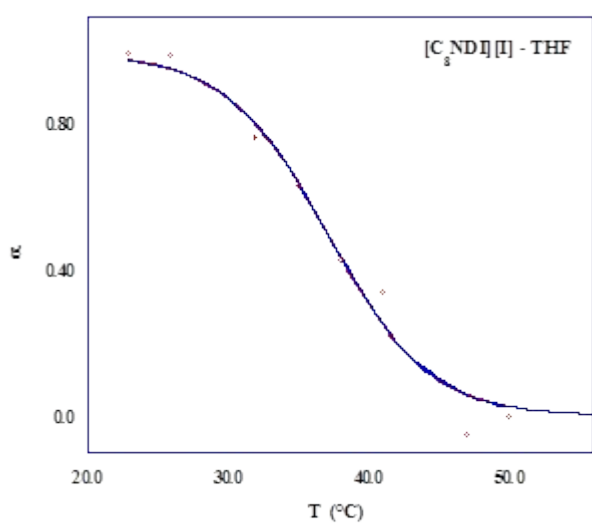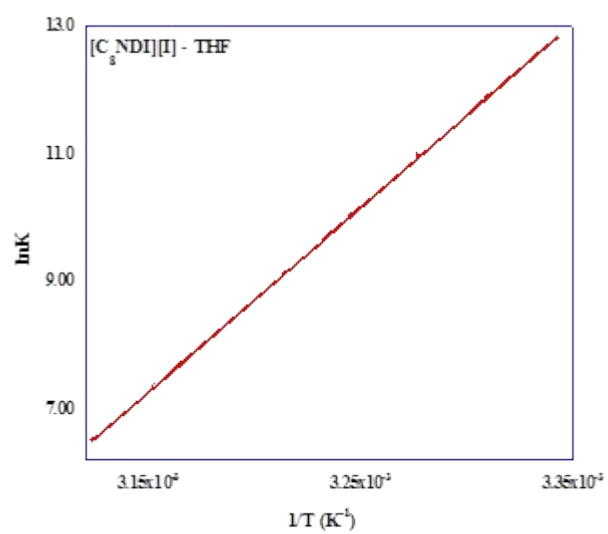

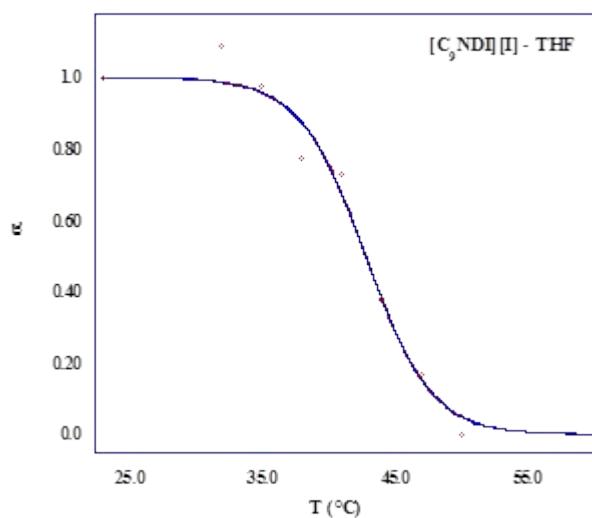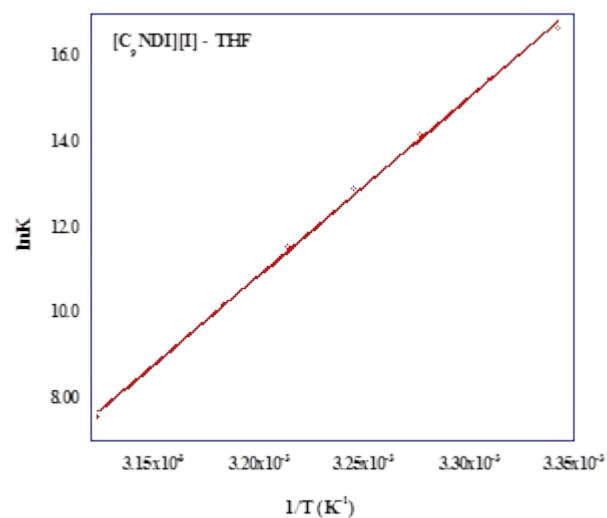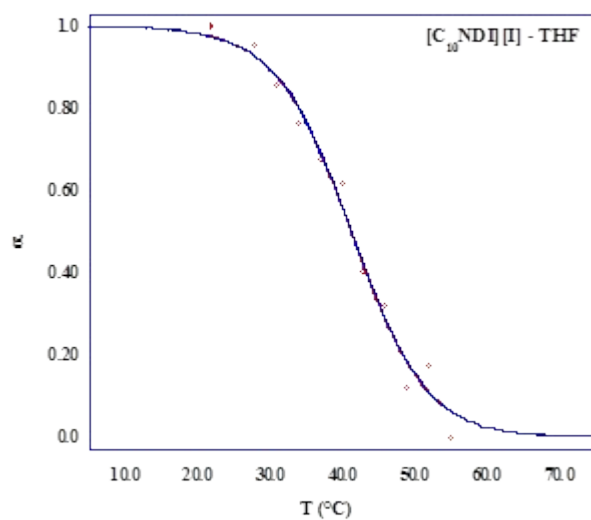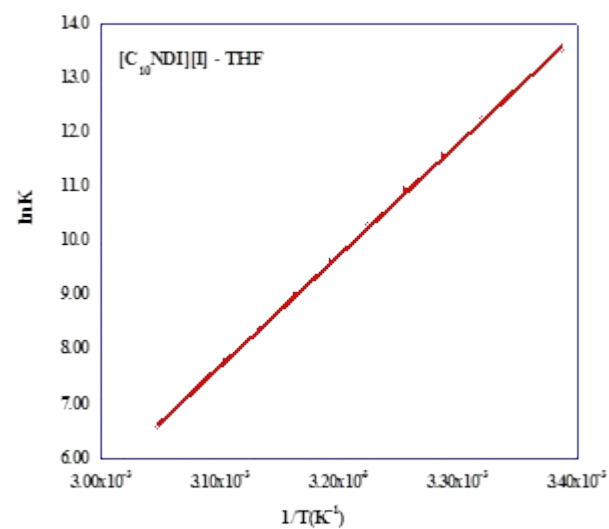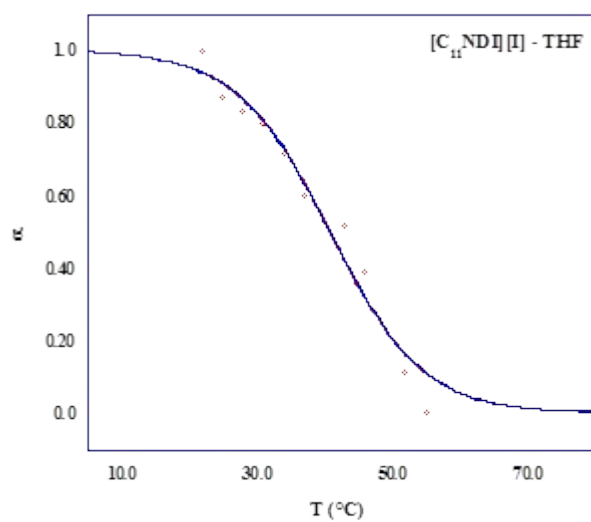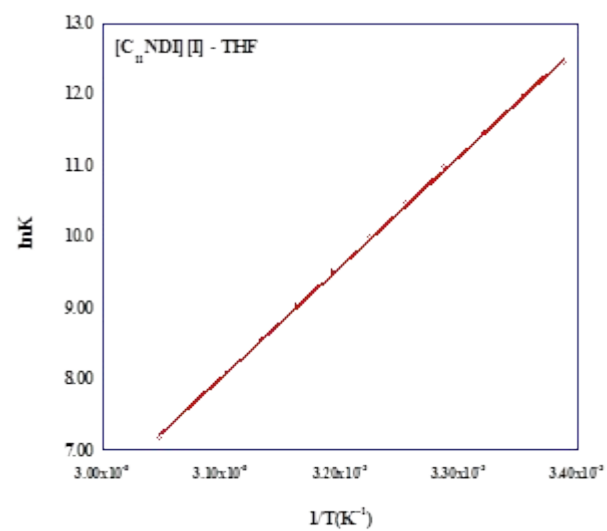

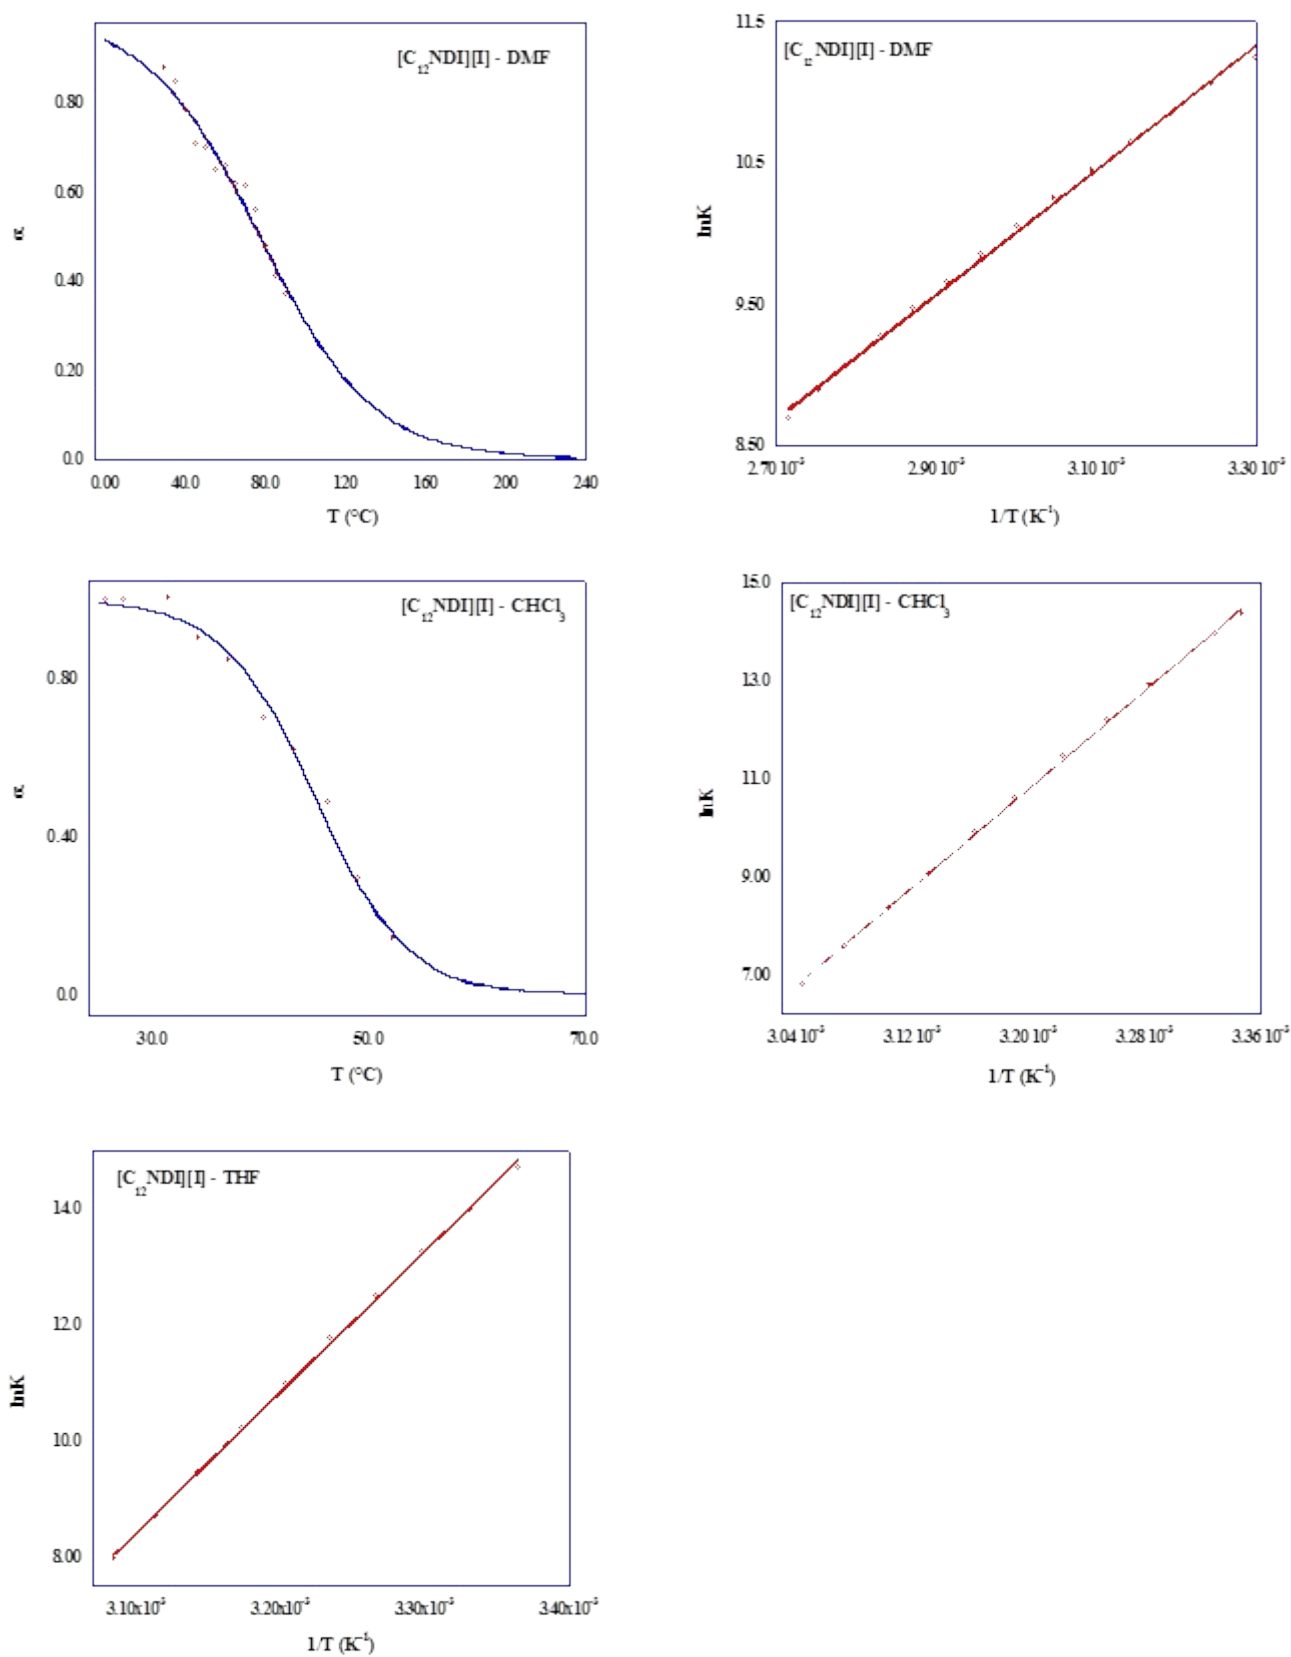

**Figure S7.**  $\alpha$  and van't Hoff plots of UV-vis analysis at variable temperature and fixed concentration ( $5 \cdot 10^{-5}$  M).  $\alpha_{agg}$  was determined at 382 nm for  $[C_6NDI][I]$ , at 380 nm for  $[C_7NDI][I]$ , at 375 nm for  $[C_8NDI][I]$ , at 377 for  $[C_9NDI][I]$ , at 375 nm for  $[C_{10}NDI][I]$  and at 374 nm  $[C_{11}NDI][I]$ .

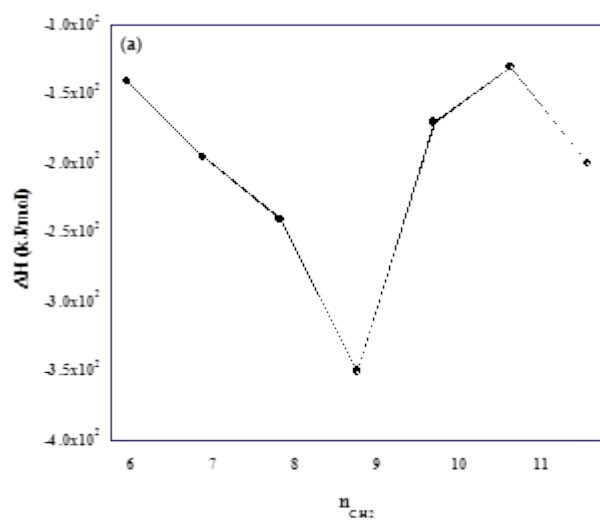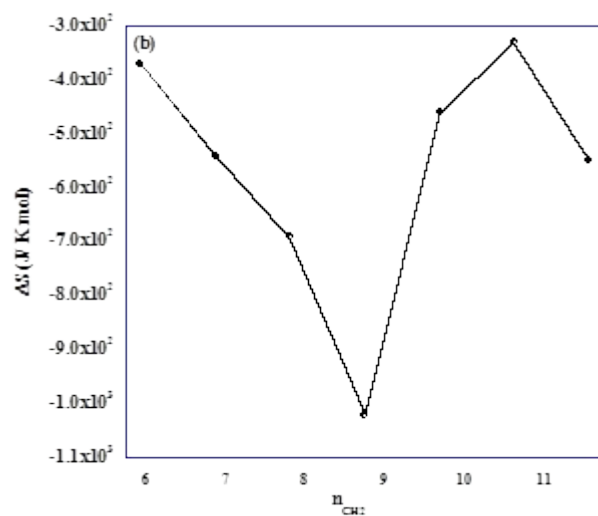

**Figure S8.** Plots of (a)  $\Delta H$  and (b)  $\Delta S$  as a function of the alkyl chain length.

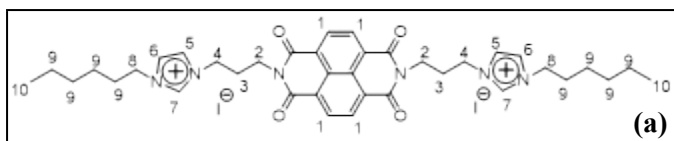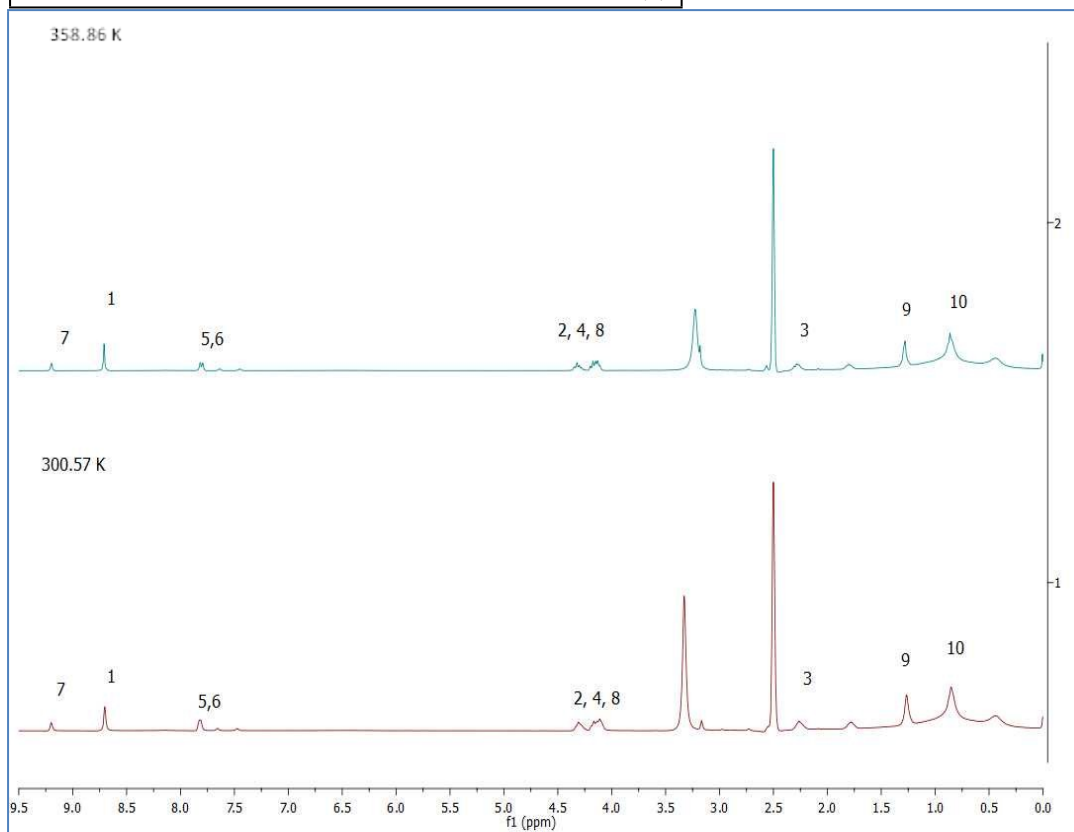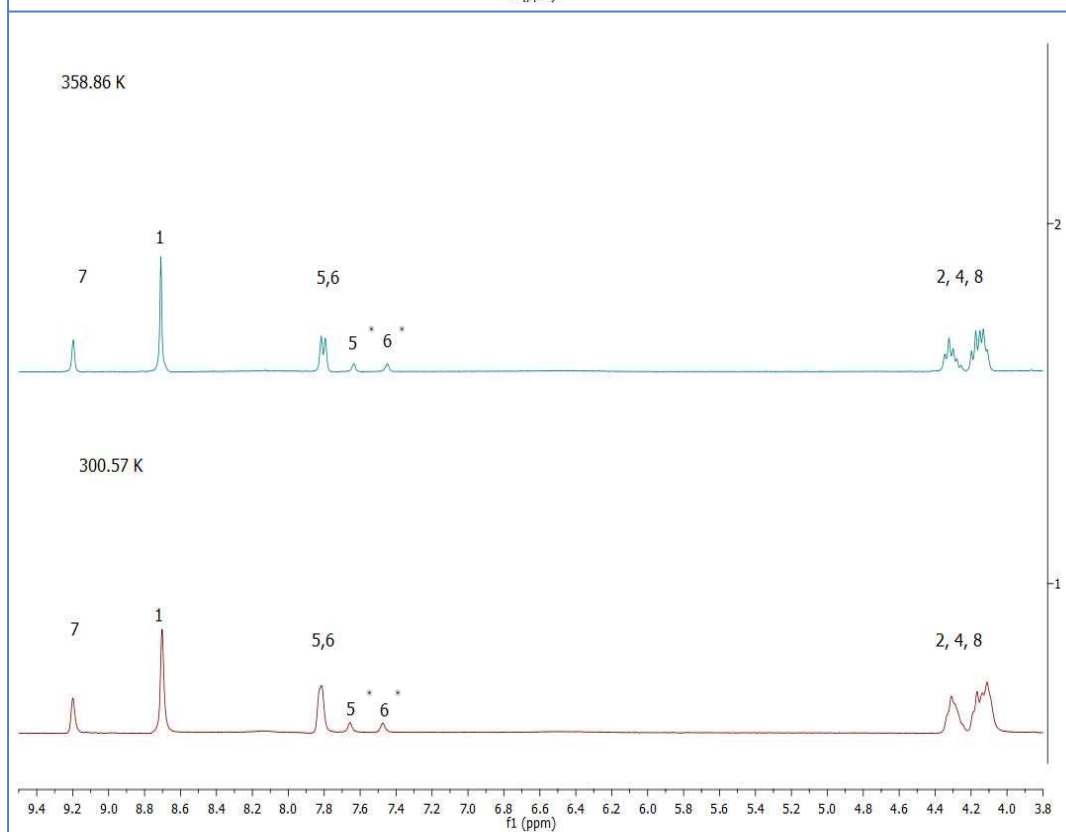

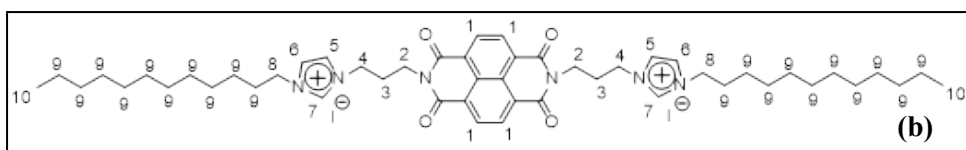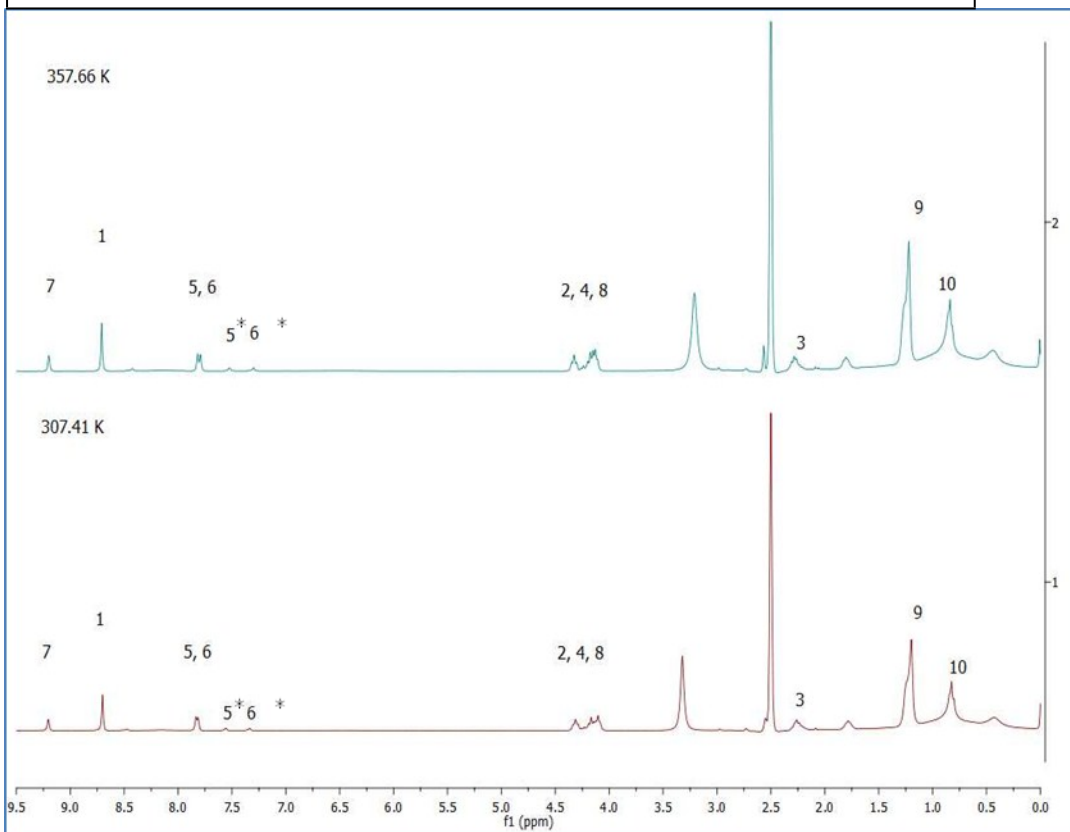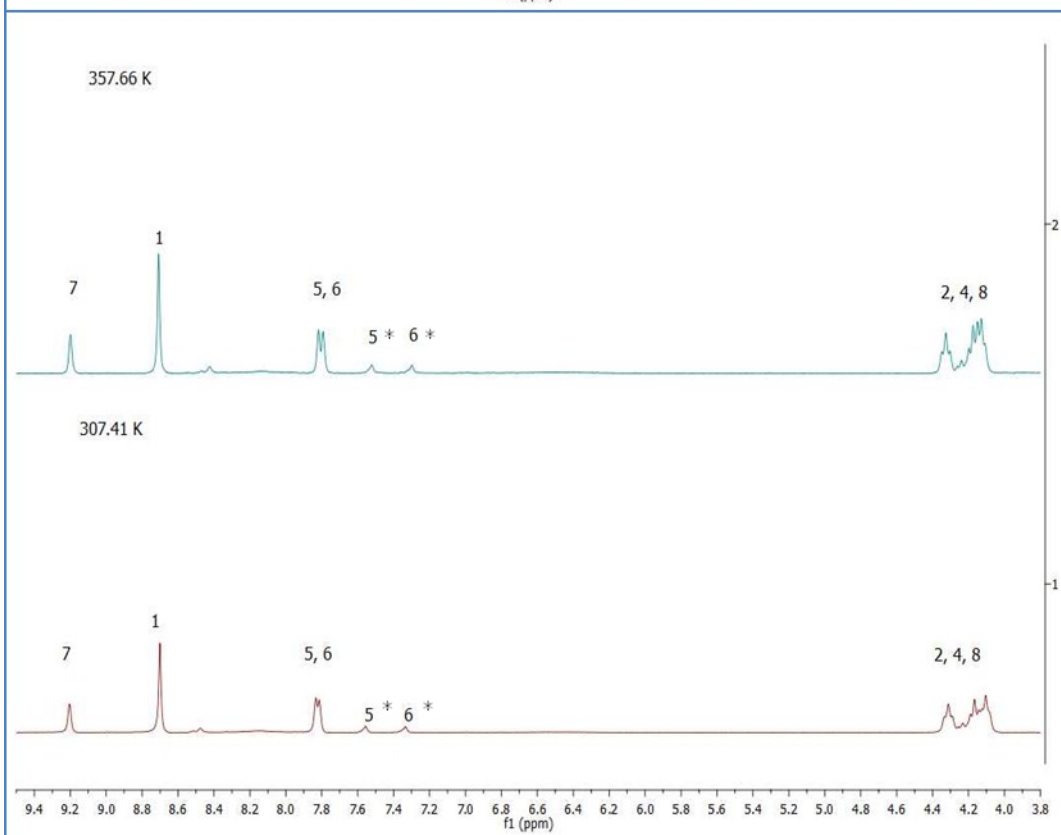

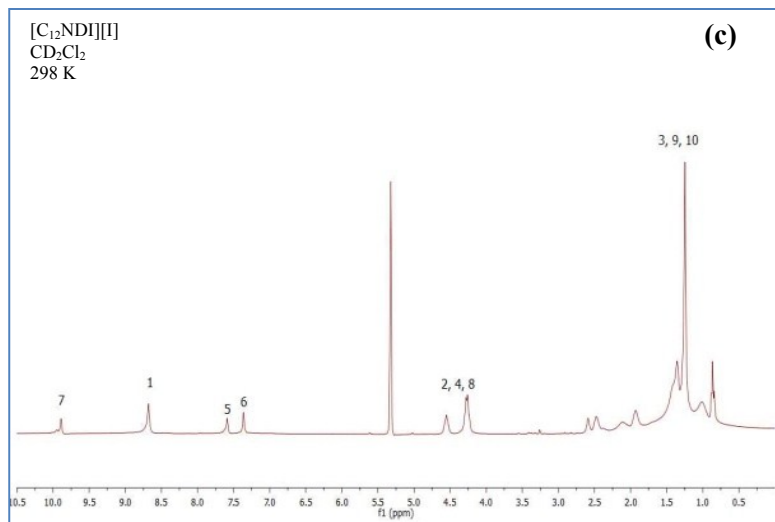

**Figure S9.** <sup>1</sup>H NMR spectra at variable temperature of (a)[C<sub>6</sub>NDI][I] in DMSO-[d<sub>6</sub>], (b)[C<sub>12</sub>NDI][I] in DMSO-[d<sub>6</sub>] and (c)[C<sub>12</sub>NDI][I] in CD<sub>2</sub>Cl<sub>2</sub>-[d<sub>2</sub>] respectively.

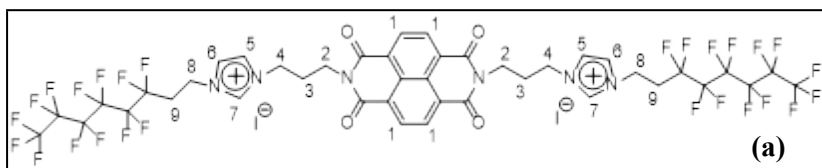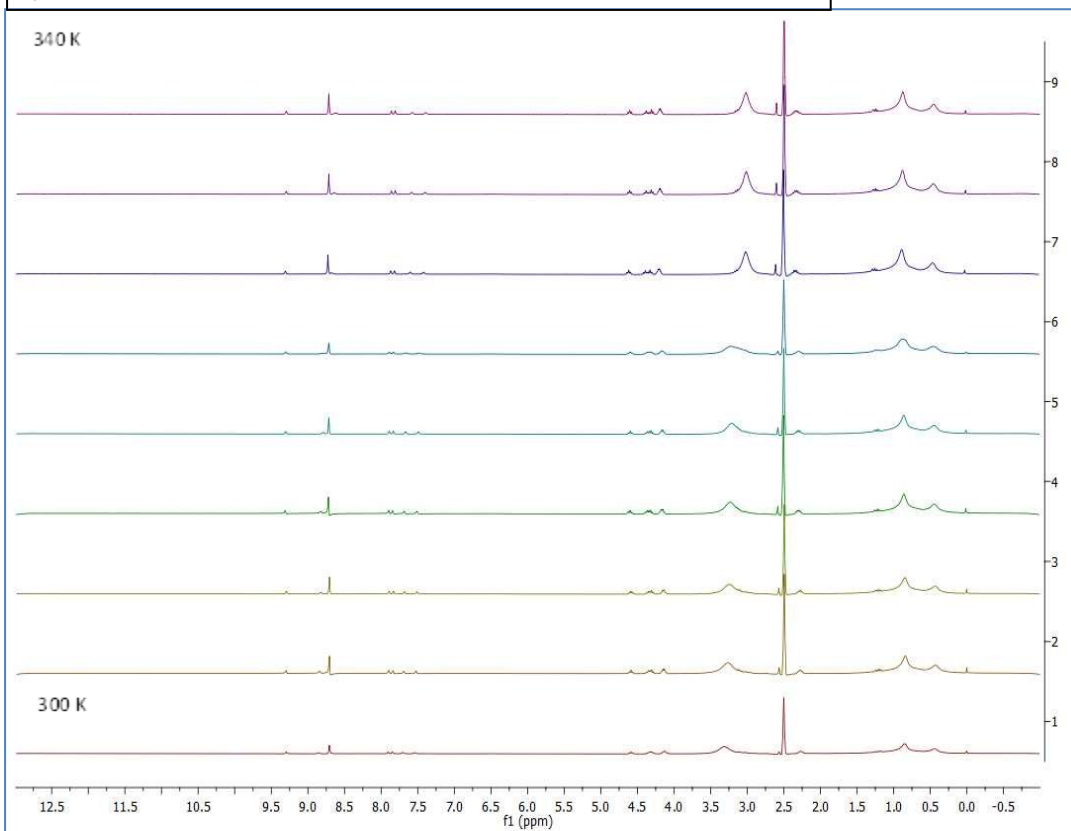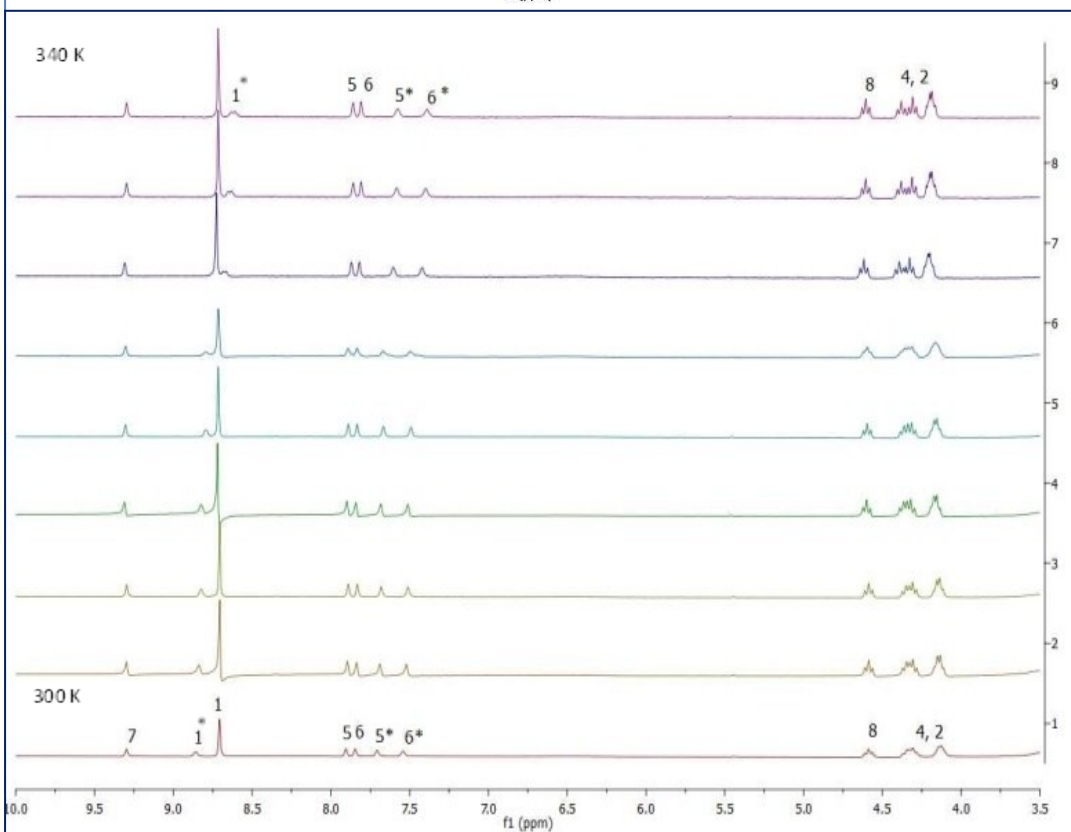

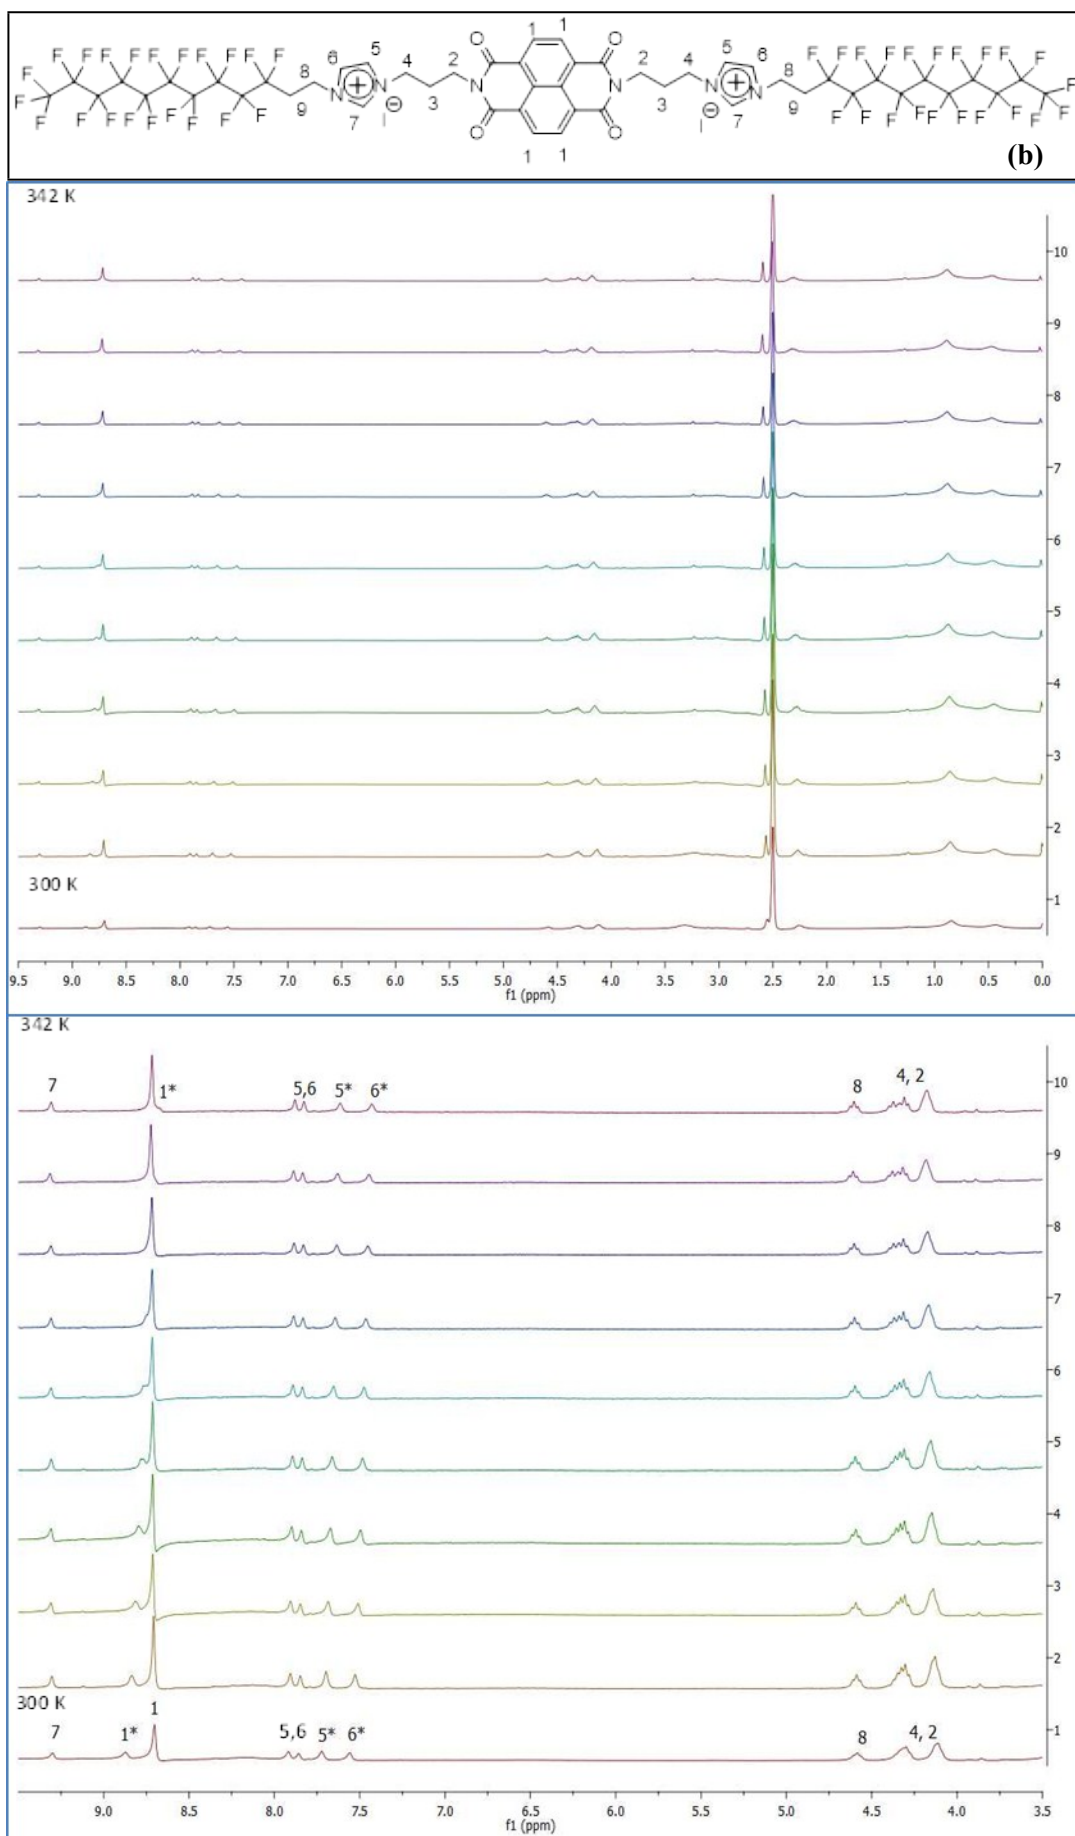

**Figure S10.**  $^1\text{H}$  NMR spectra at variable temperature of (a)  $[\text{C}_8\text{FNDI}][\text{I}]$  in  $\text{DMSO}-[\text{d}_6]$  and (b)  $[\text{C}_{12}\text{FNDI}][\text{I}]$  in  $\text{DMSO}-[\text{d}_6]$  respectively.

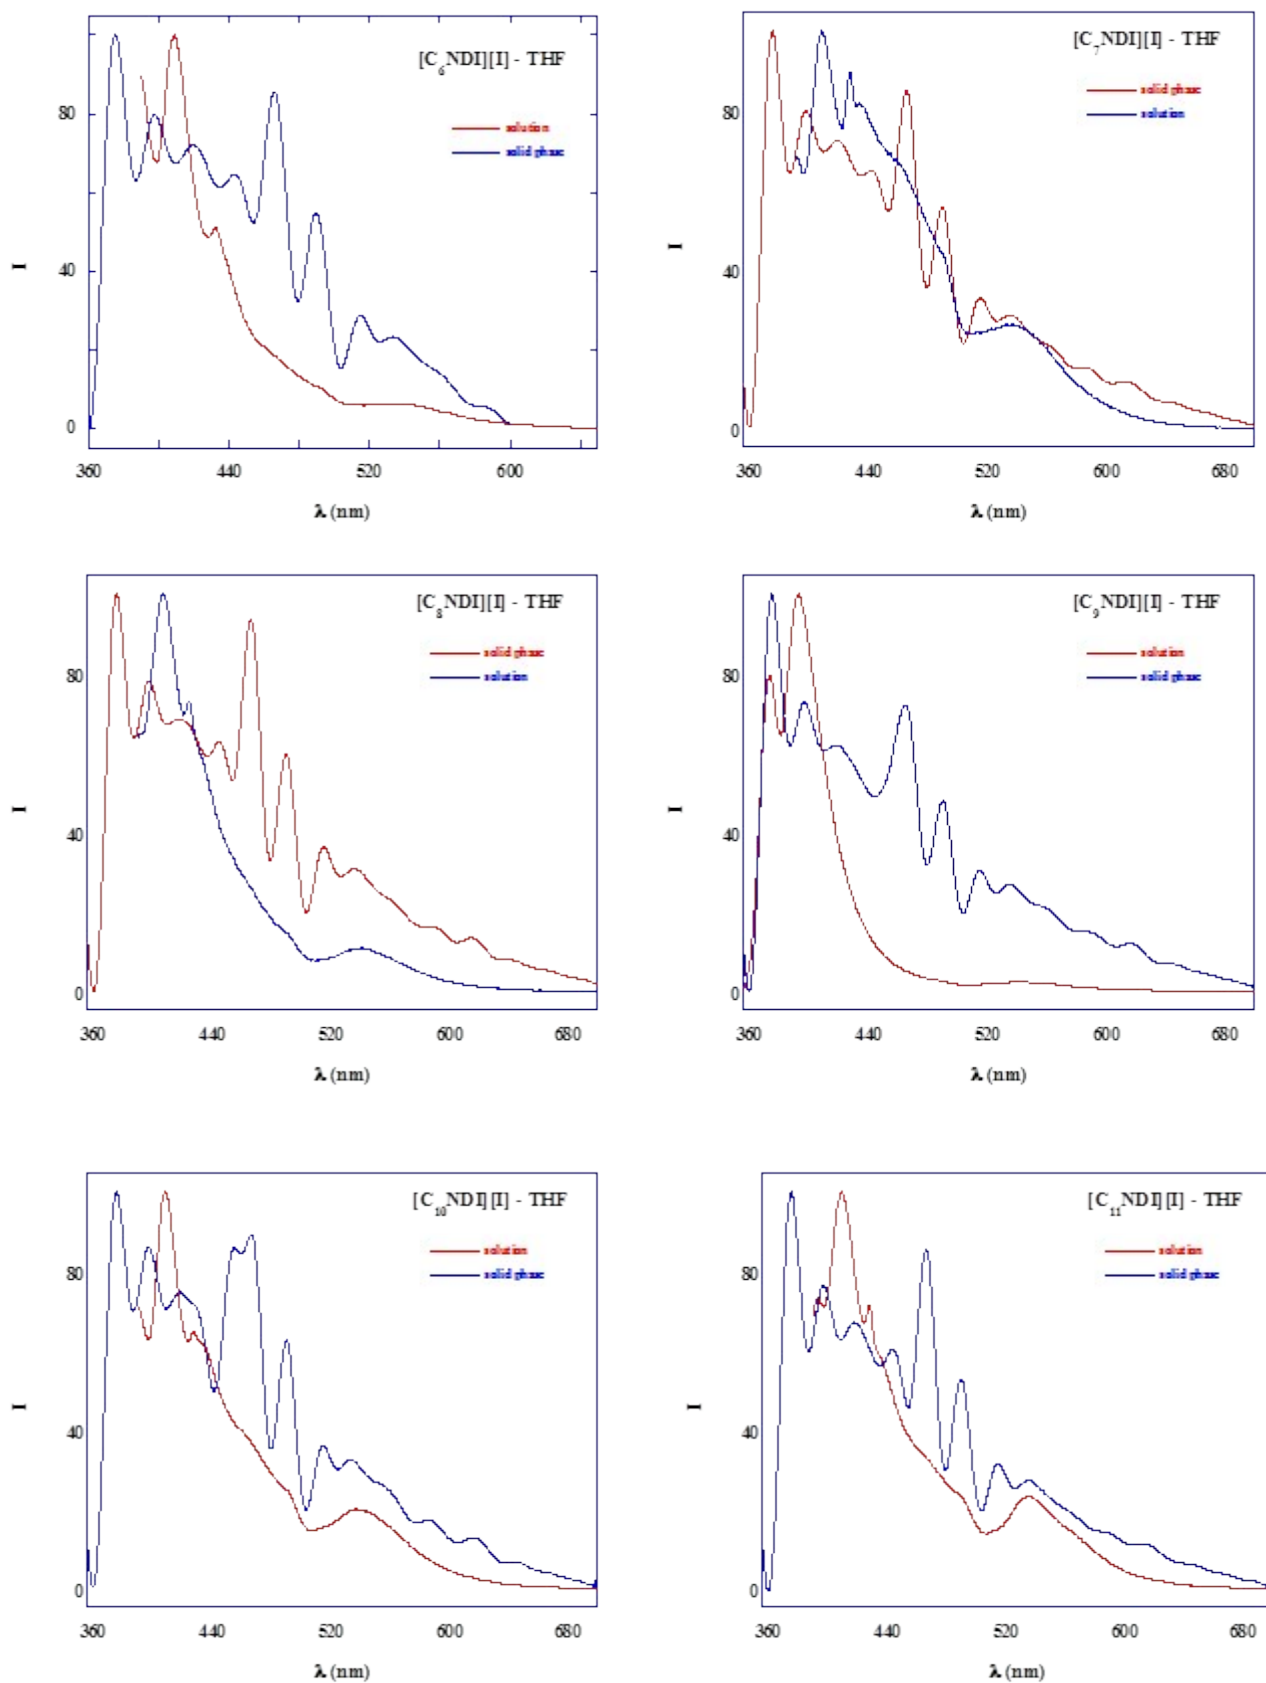

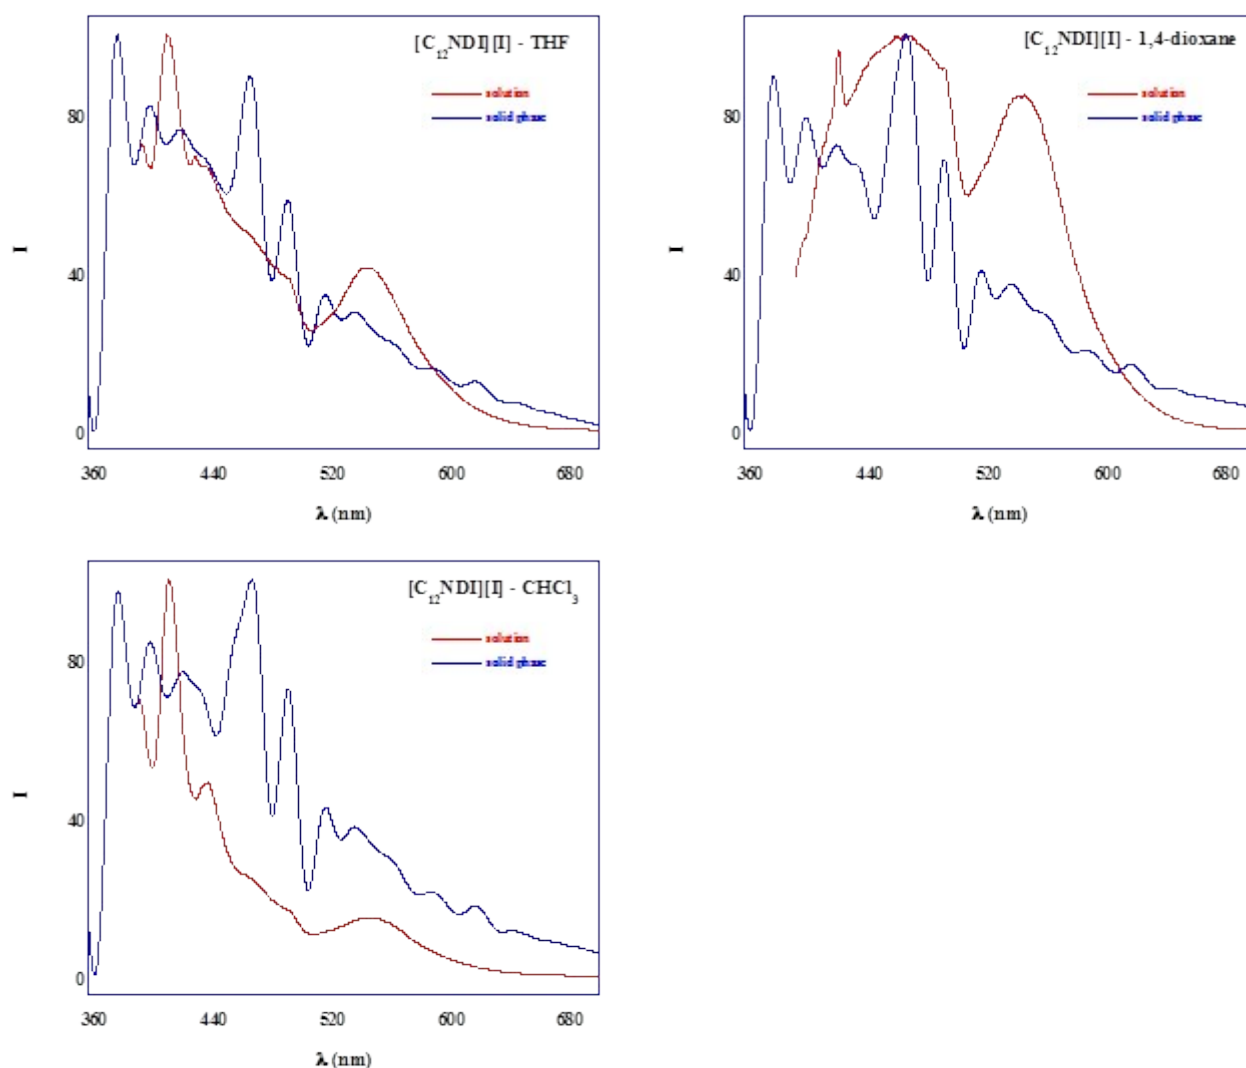

**Figure S11.** Fluorescent spectra in solution and in solid phase of salts. Fluorescence intensities are in arbitrary units. Excitation wavelength for solid-phase spectra are: 275 nm for  $[C_6NDI][I]$ , 277 nm for  $[C_7NDI][I]$ , 272 nm for  $[C_8NDI][I]$ ,  $[C_9NDI][I]$ , and  $[C_{10}NDI][I]$ , 274 nm for  $[C_{12}NDI][I]$  deriving from drop-casting of solution in dioxane and chloroform. Excitation wavelength for solution-phase spectra are: 375 nm for  $[C_6NDI][I]$ , 380 nm for  $[C_7NDI][I]$ , 378 nm for  $[C_8NDI][I]$ , 382 nm for  $[C_9NDI][I]$  and  $[C_{10}NDI][I]$ , 381 nm for  $[C_{11}NDI][I]$ , 380 nm for  $[C_{12}NDI][I]$  in dioxane and 383 nm for  $[C_{12}NDI][I]$  in chloroform.

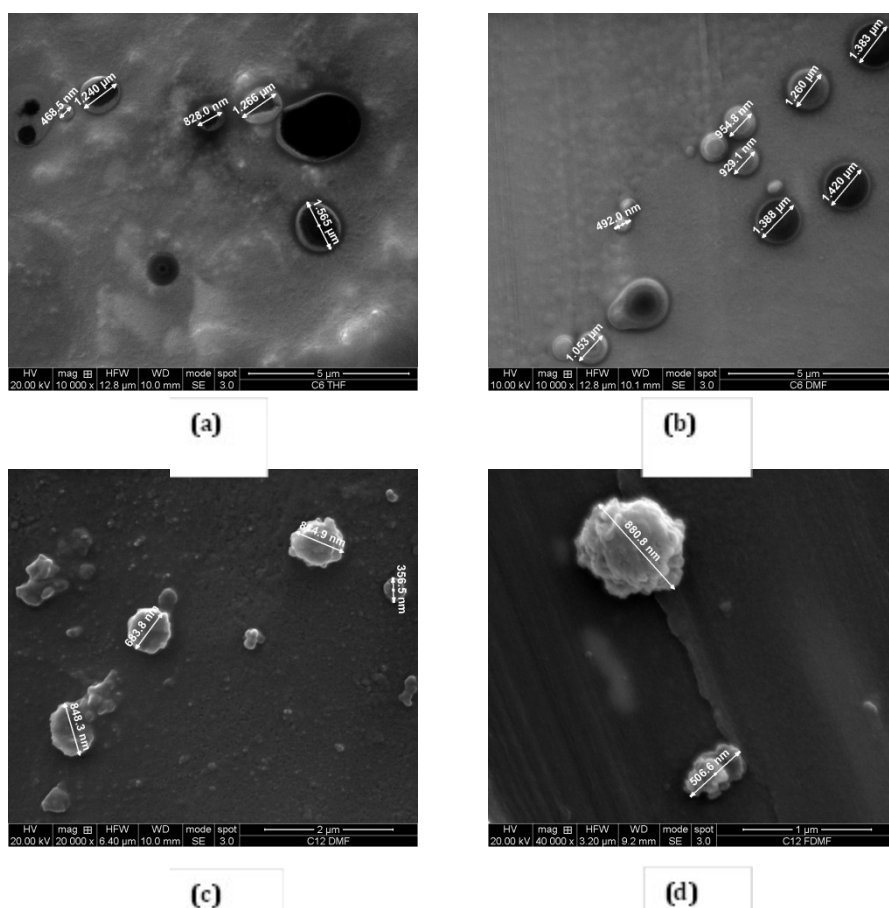

**Figure S12.** SEM images collected at  $5 \cdot 10^{-5}$  M from casting of (a)  $[C_6NDI][I]$  in THF; (b)  $[C_6NDI][I]$  in DMF; (c)  $[C_{12}NDI][I]$  in DMF; (d) and (e)  $[C_{12}FNDI][I]$  in DMF.

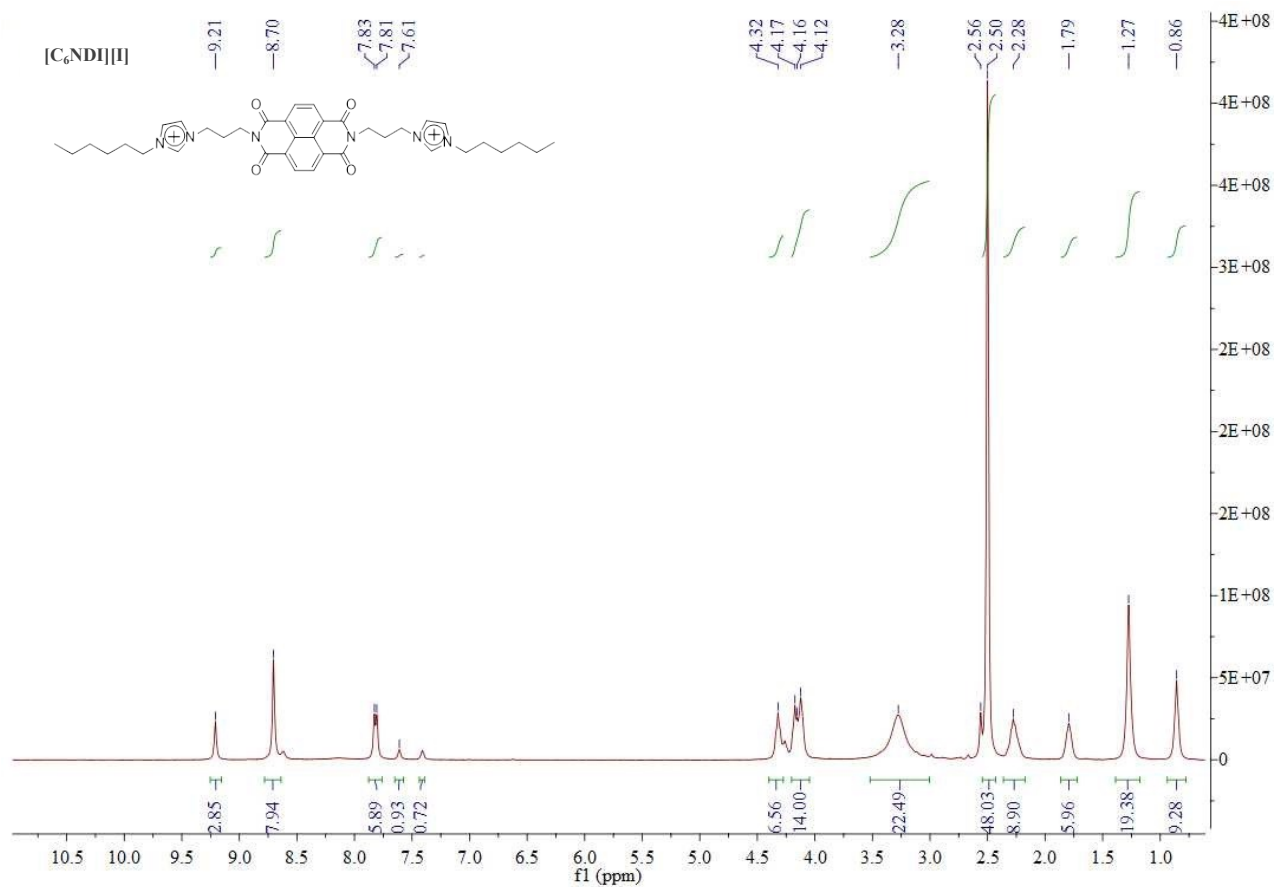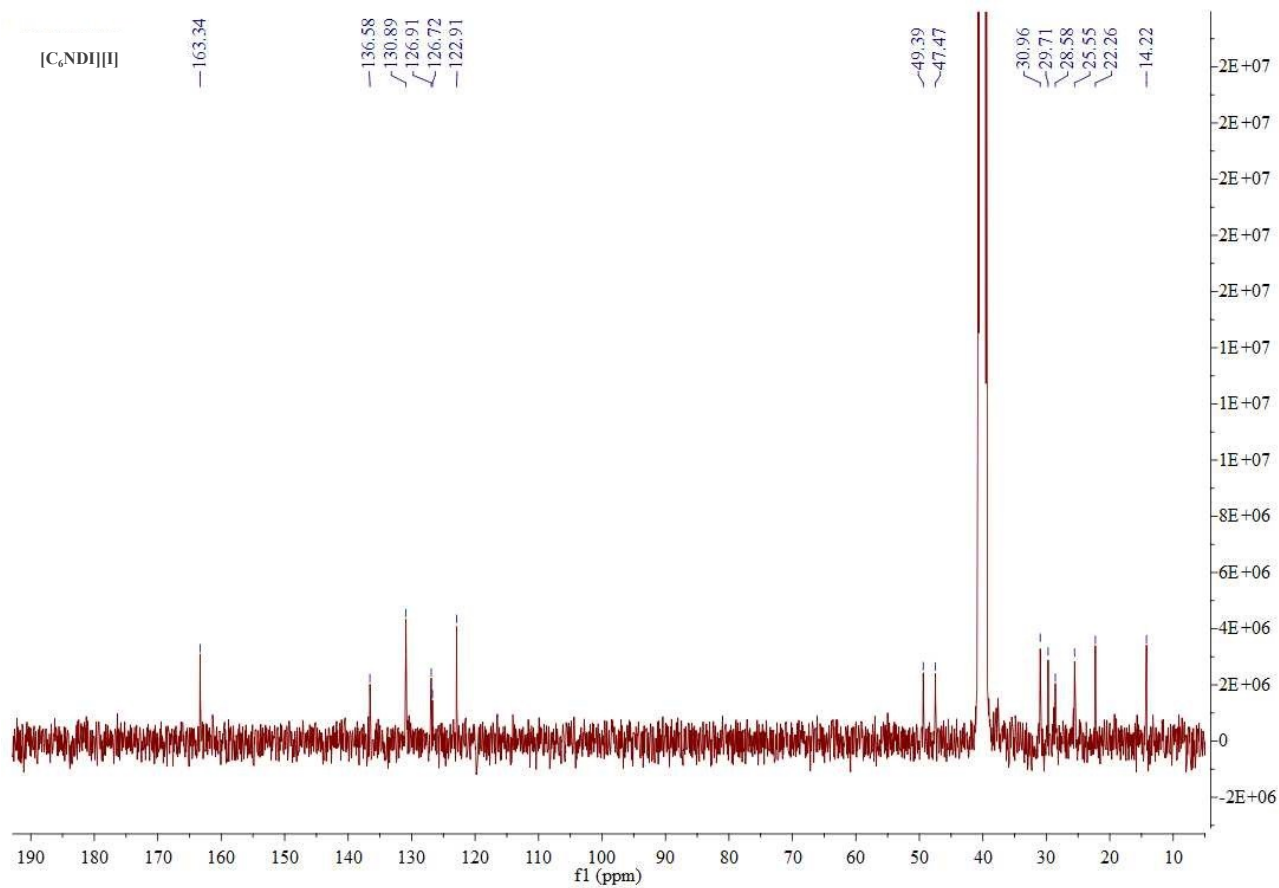

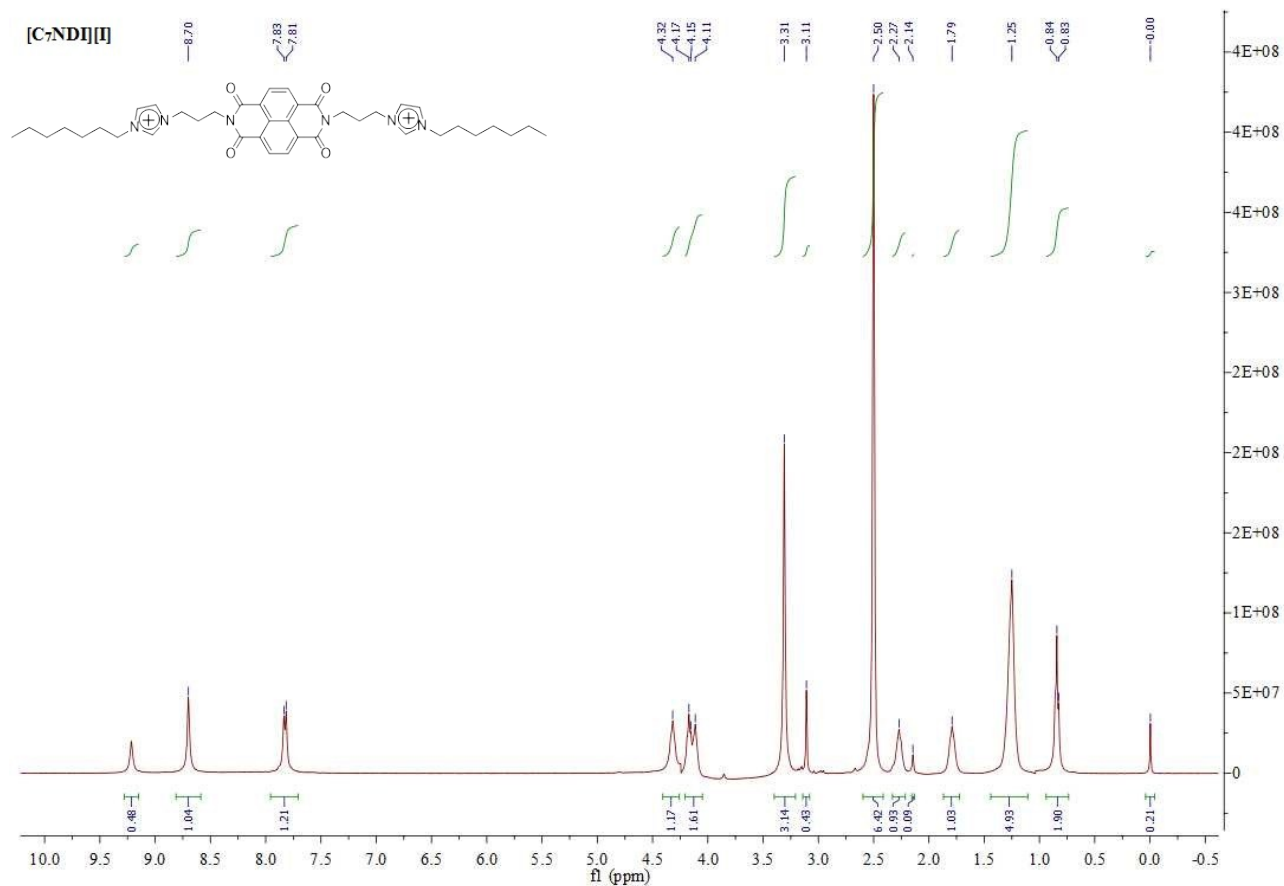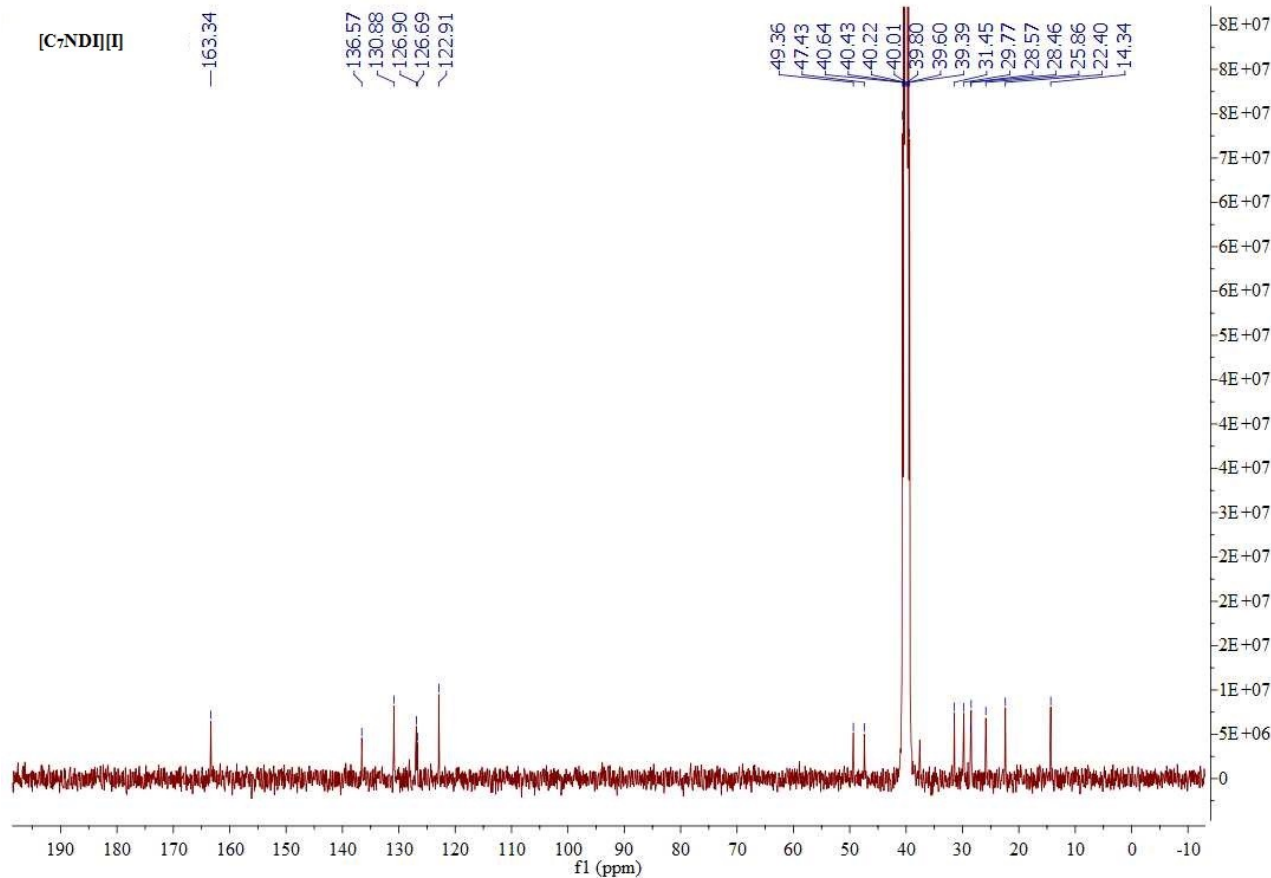

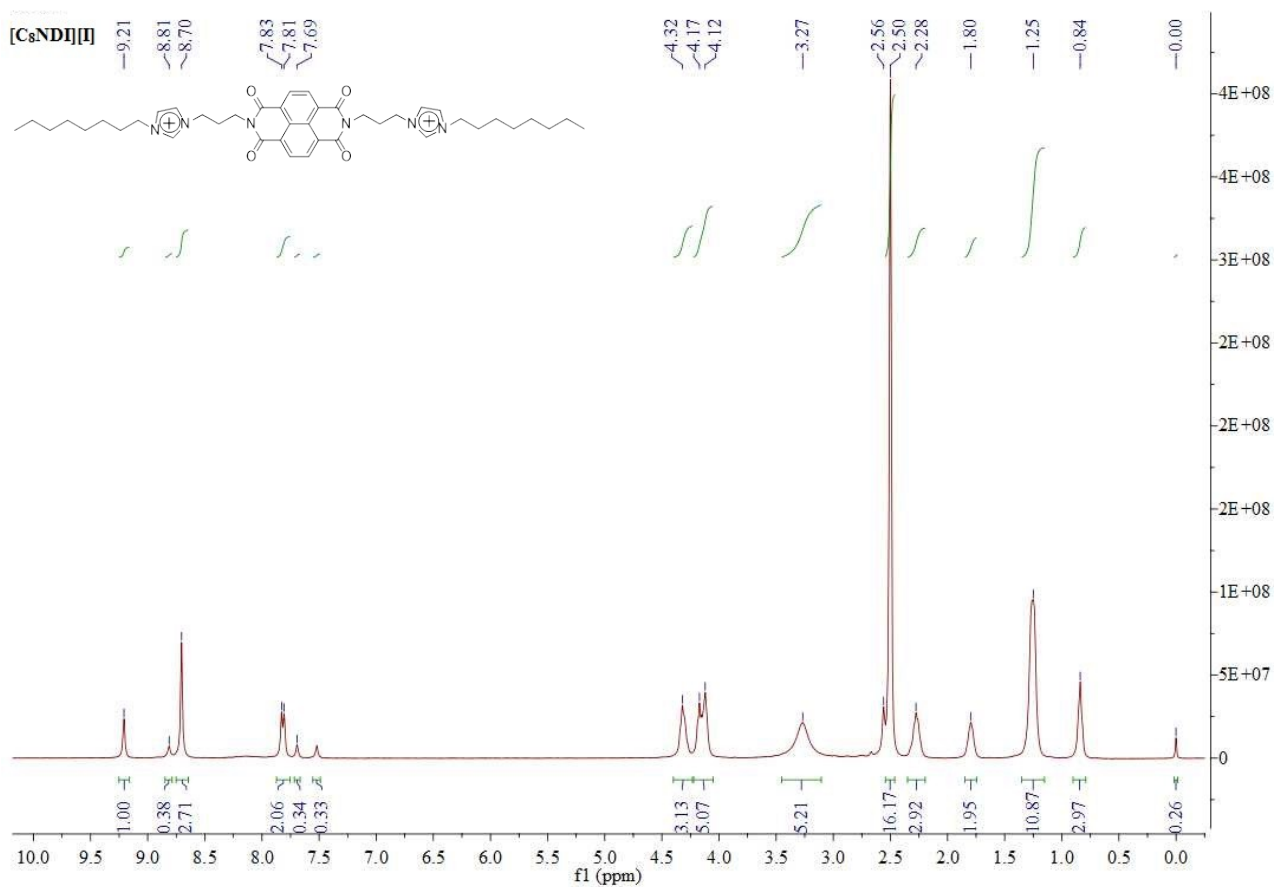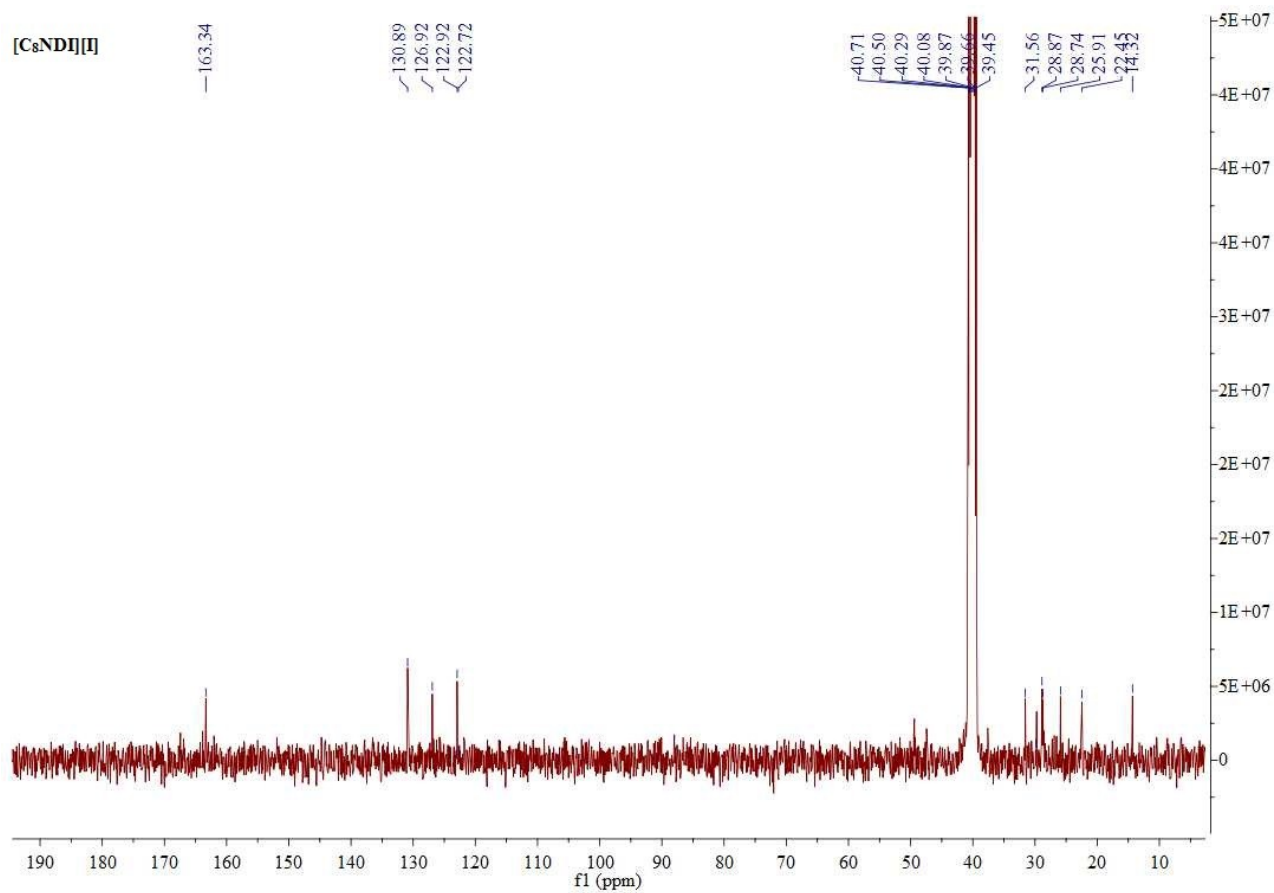

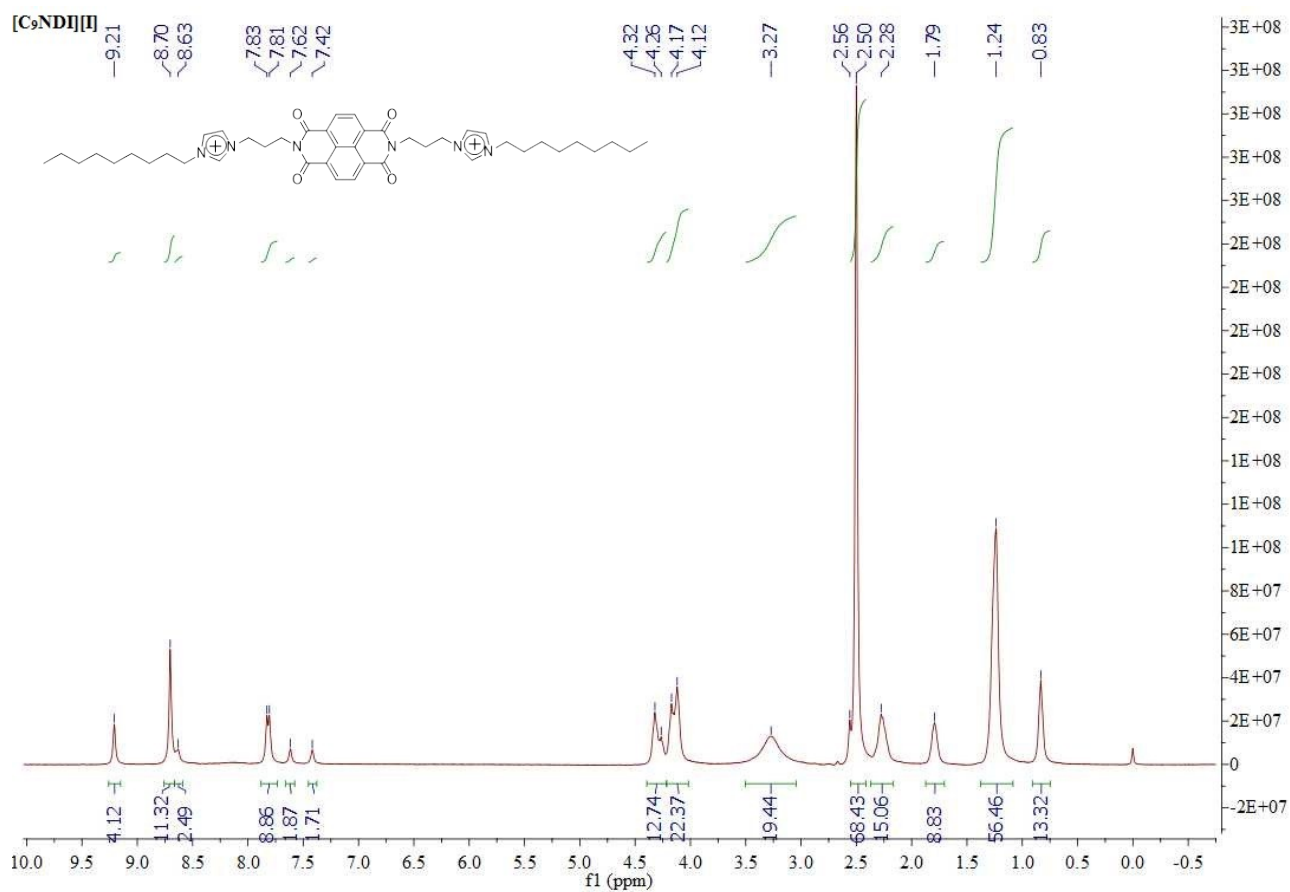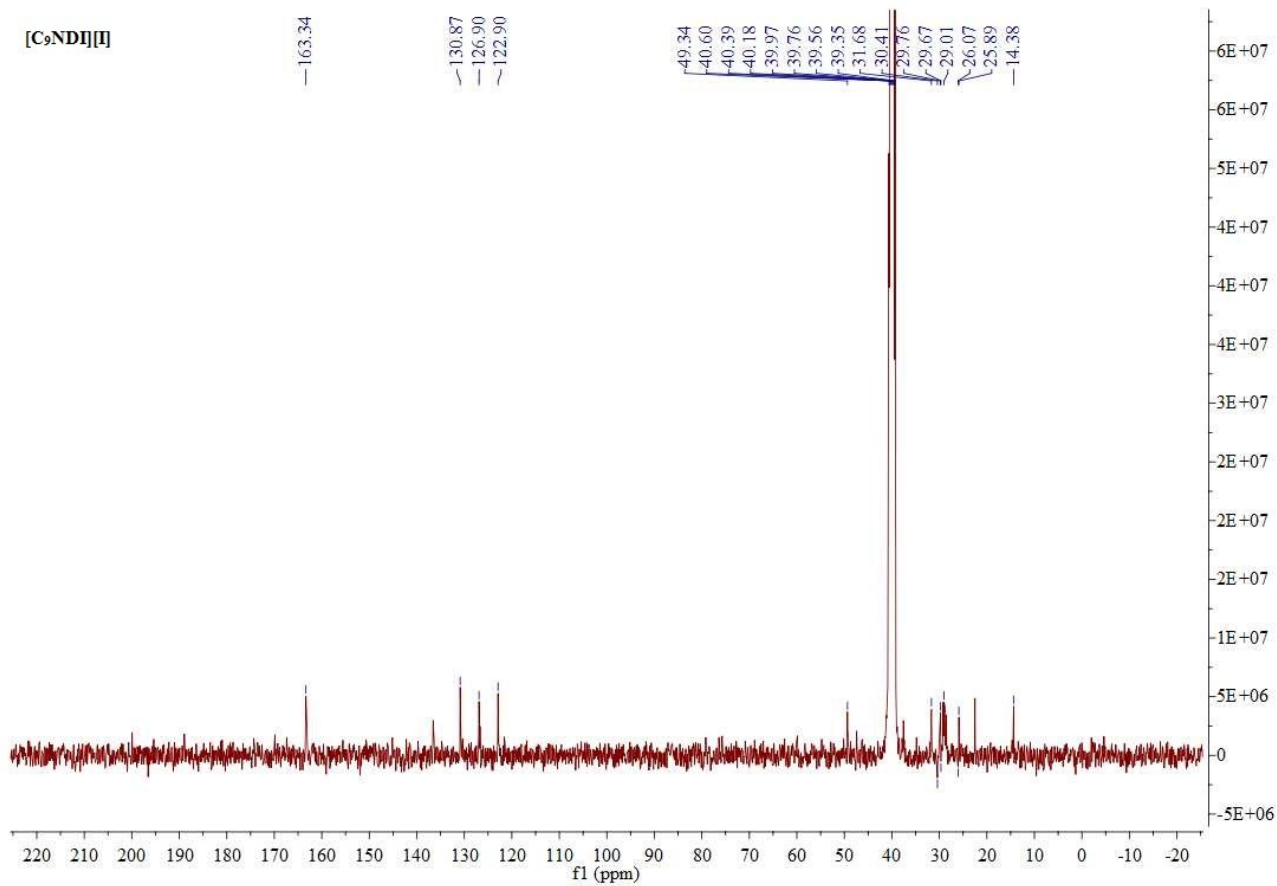

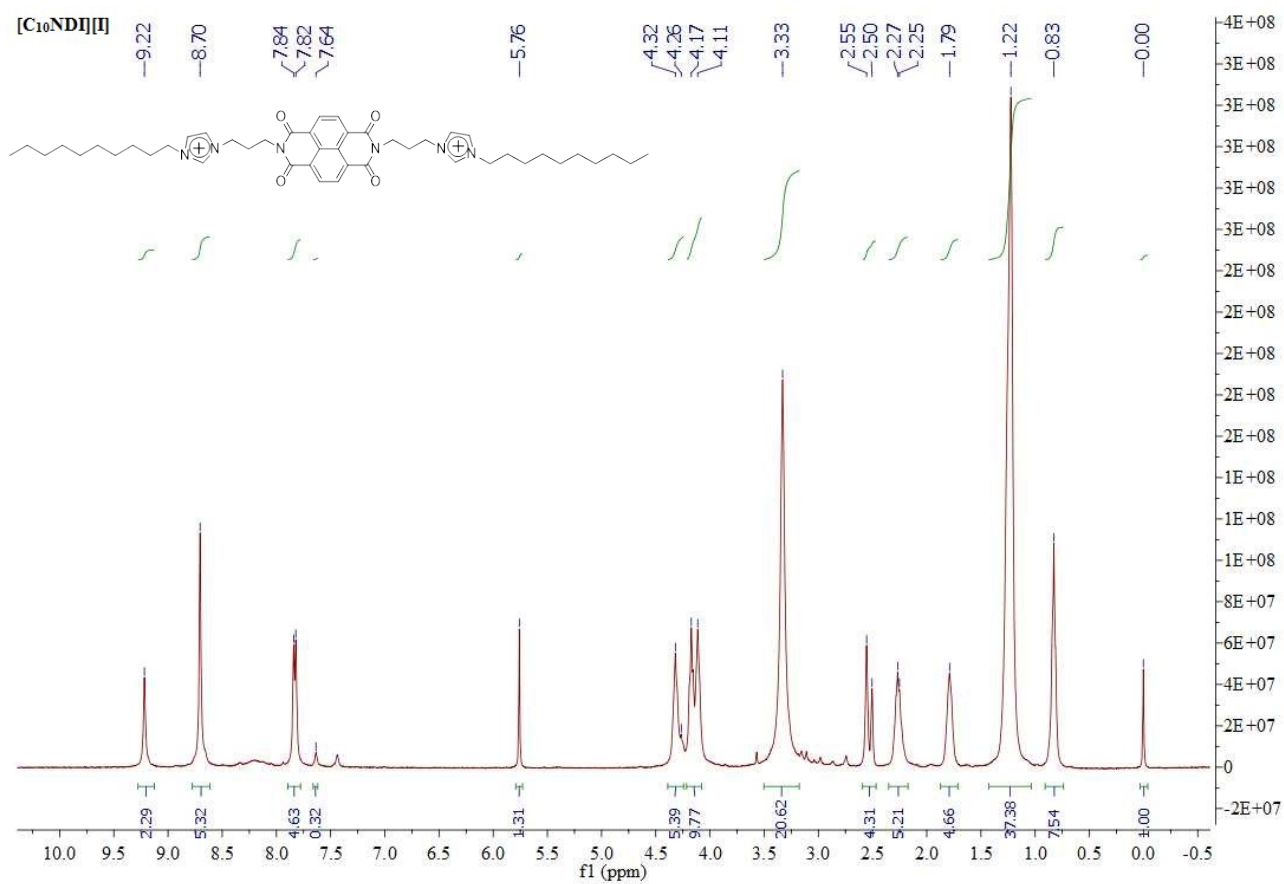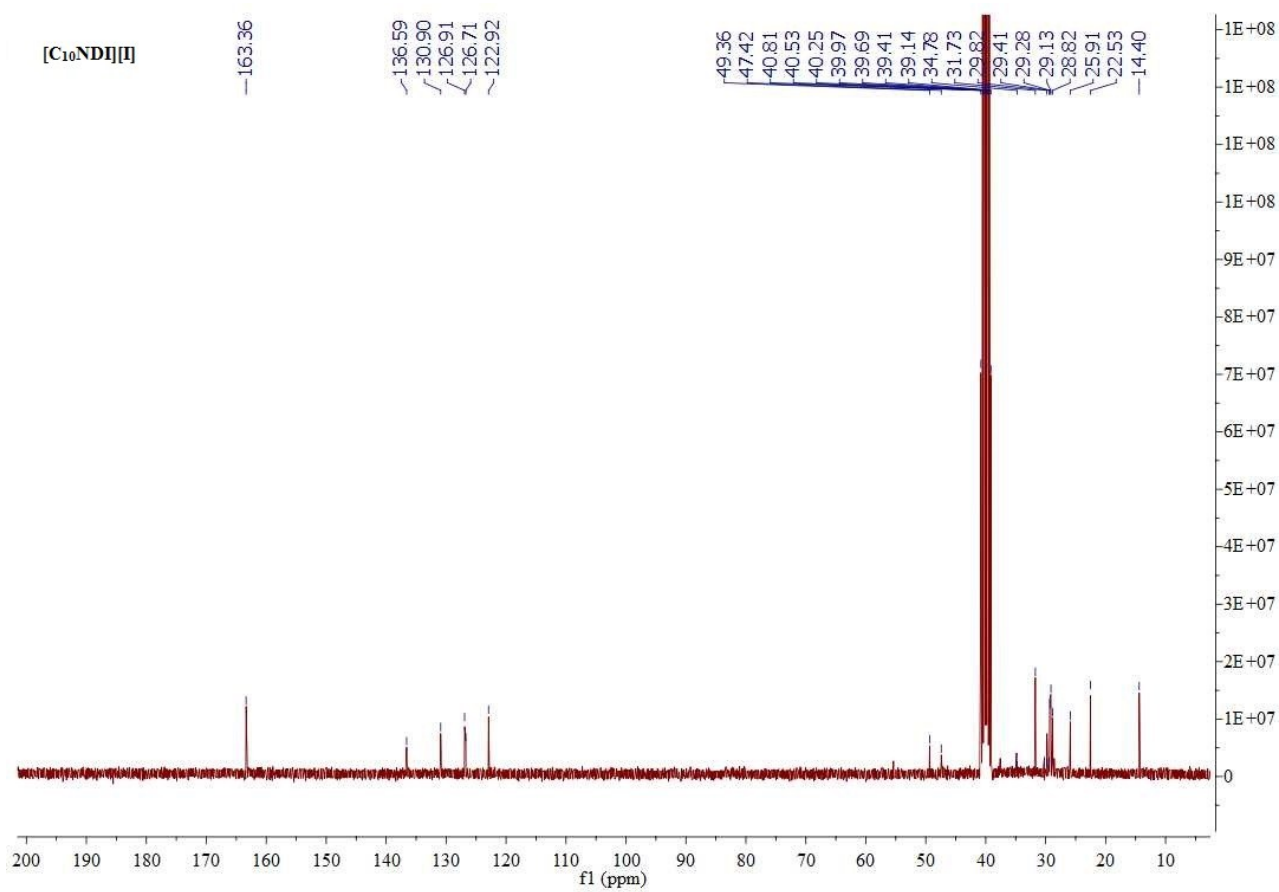

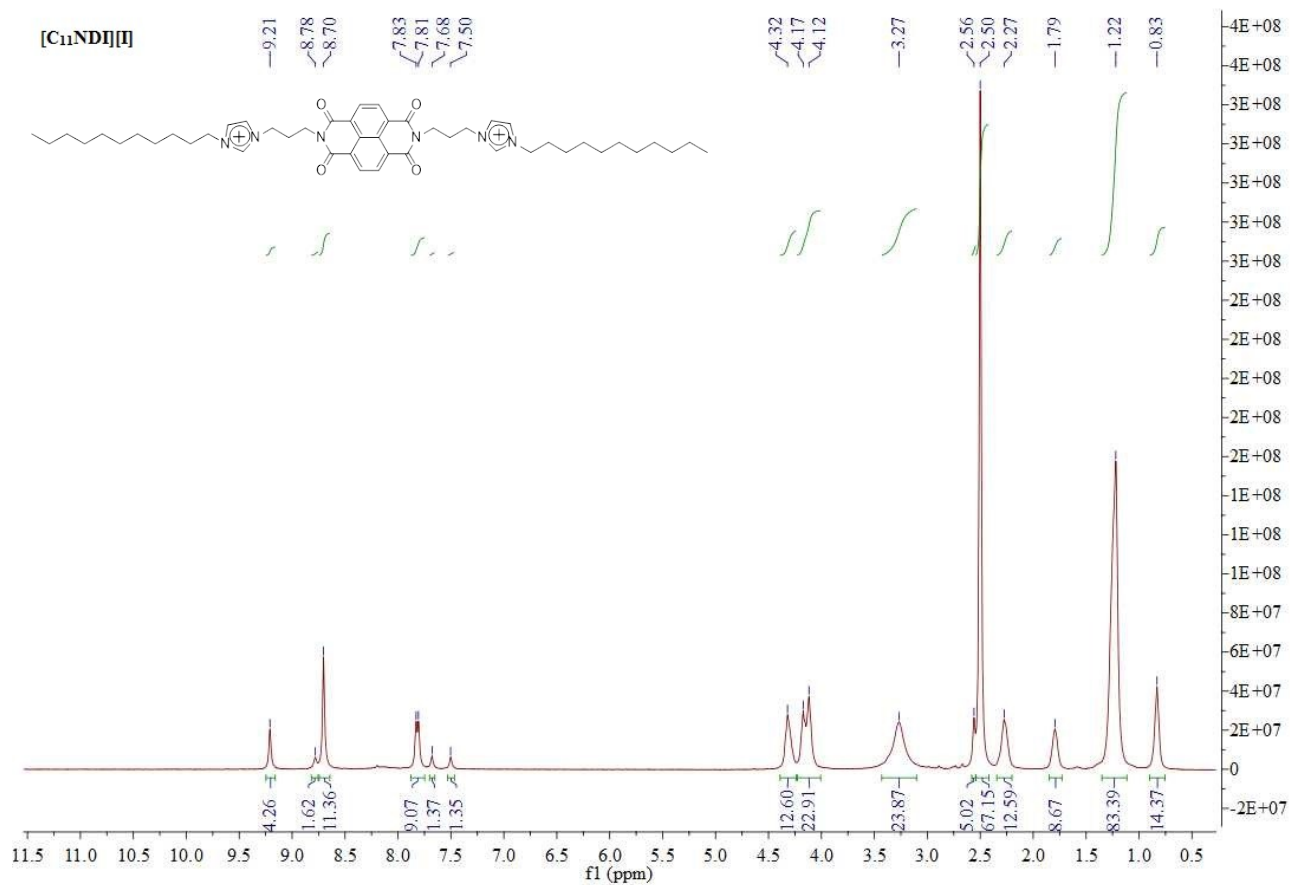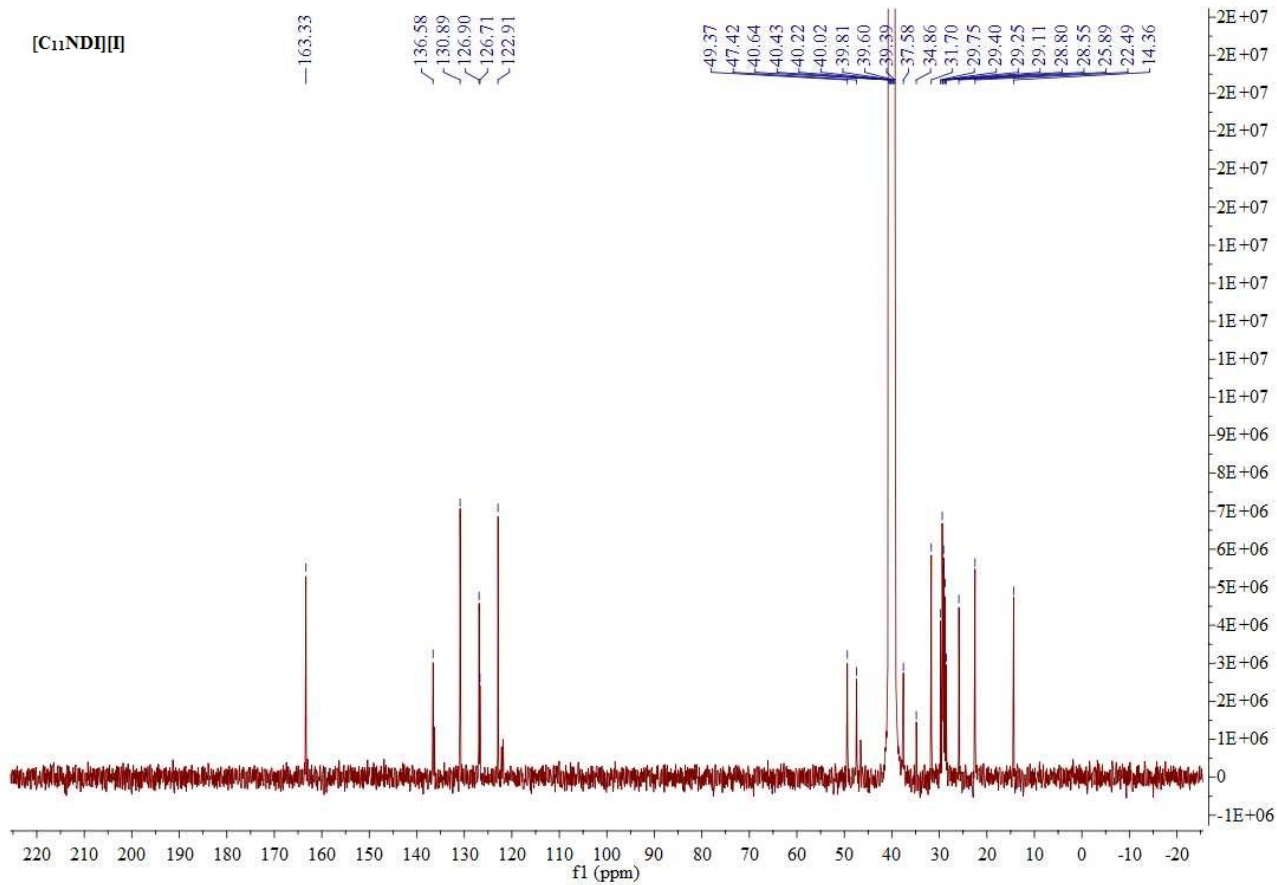

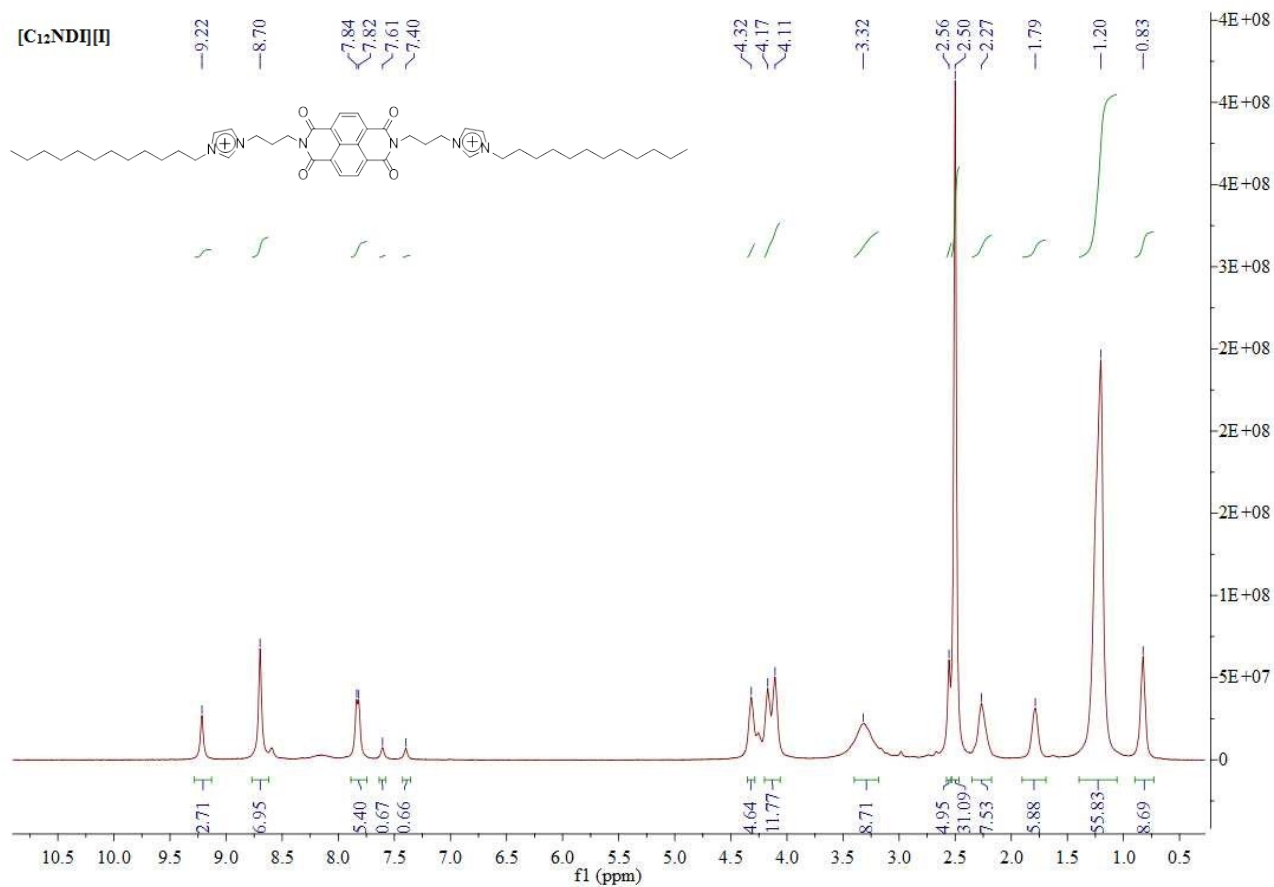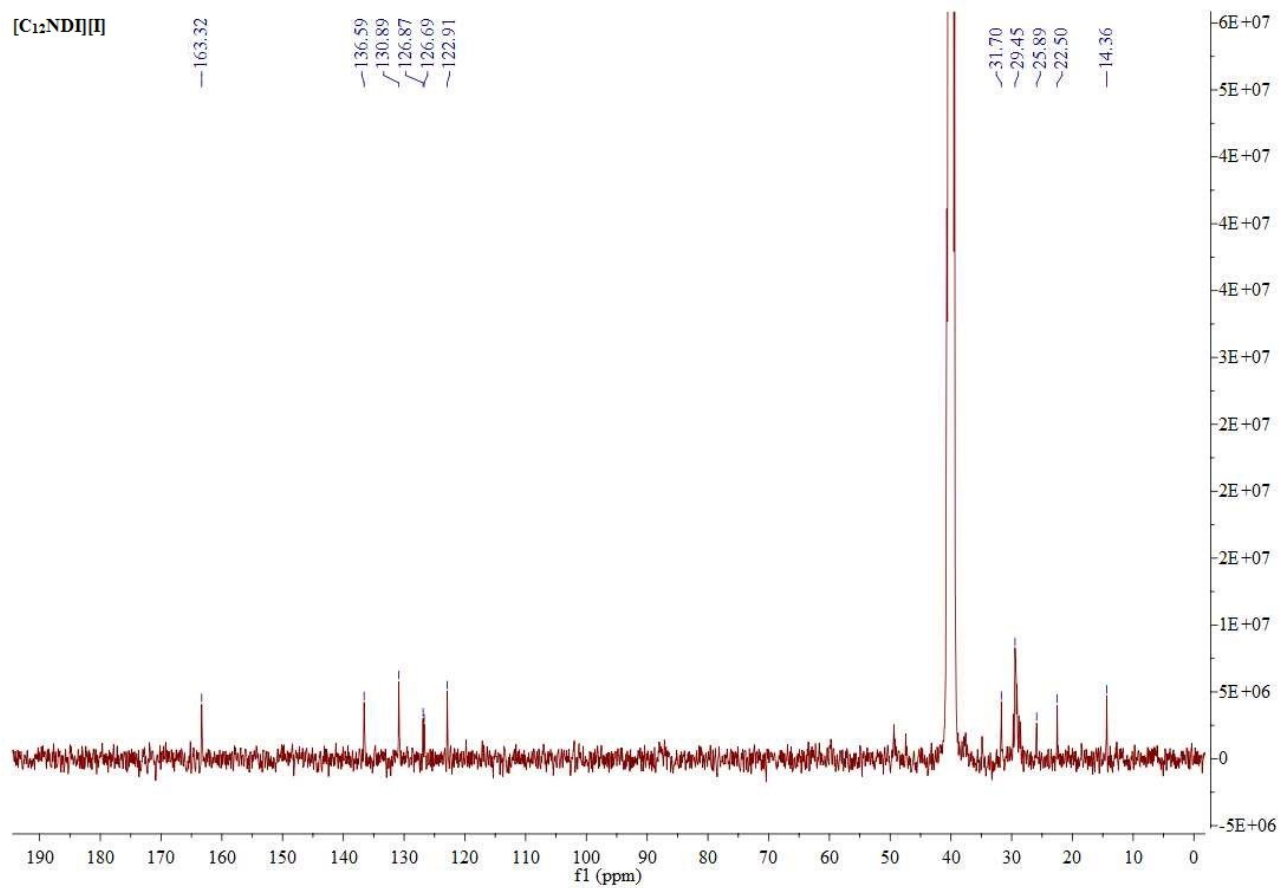

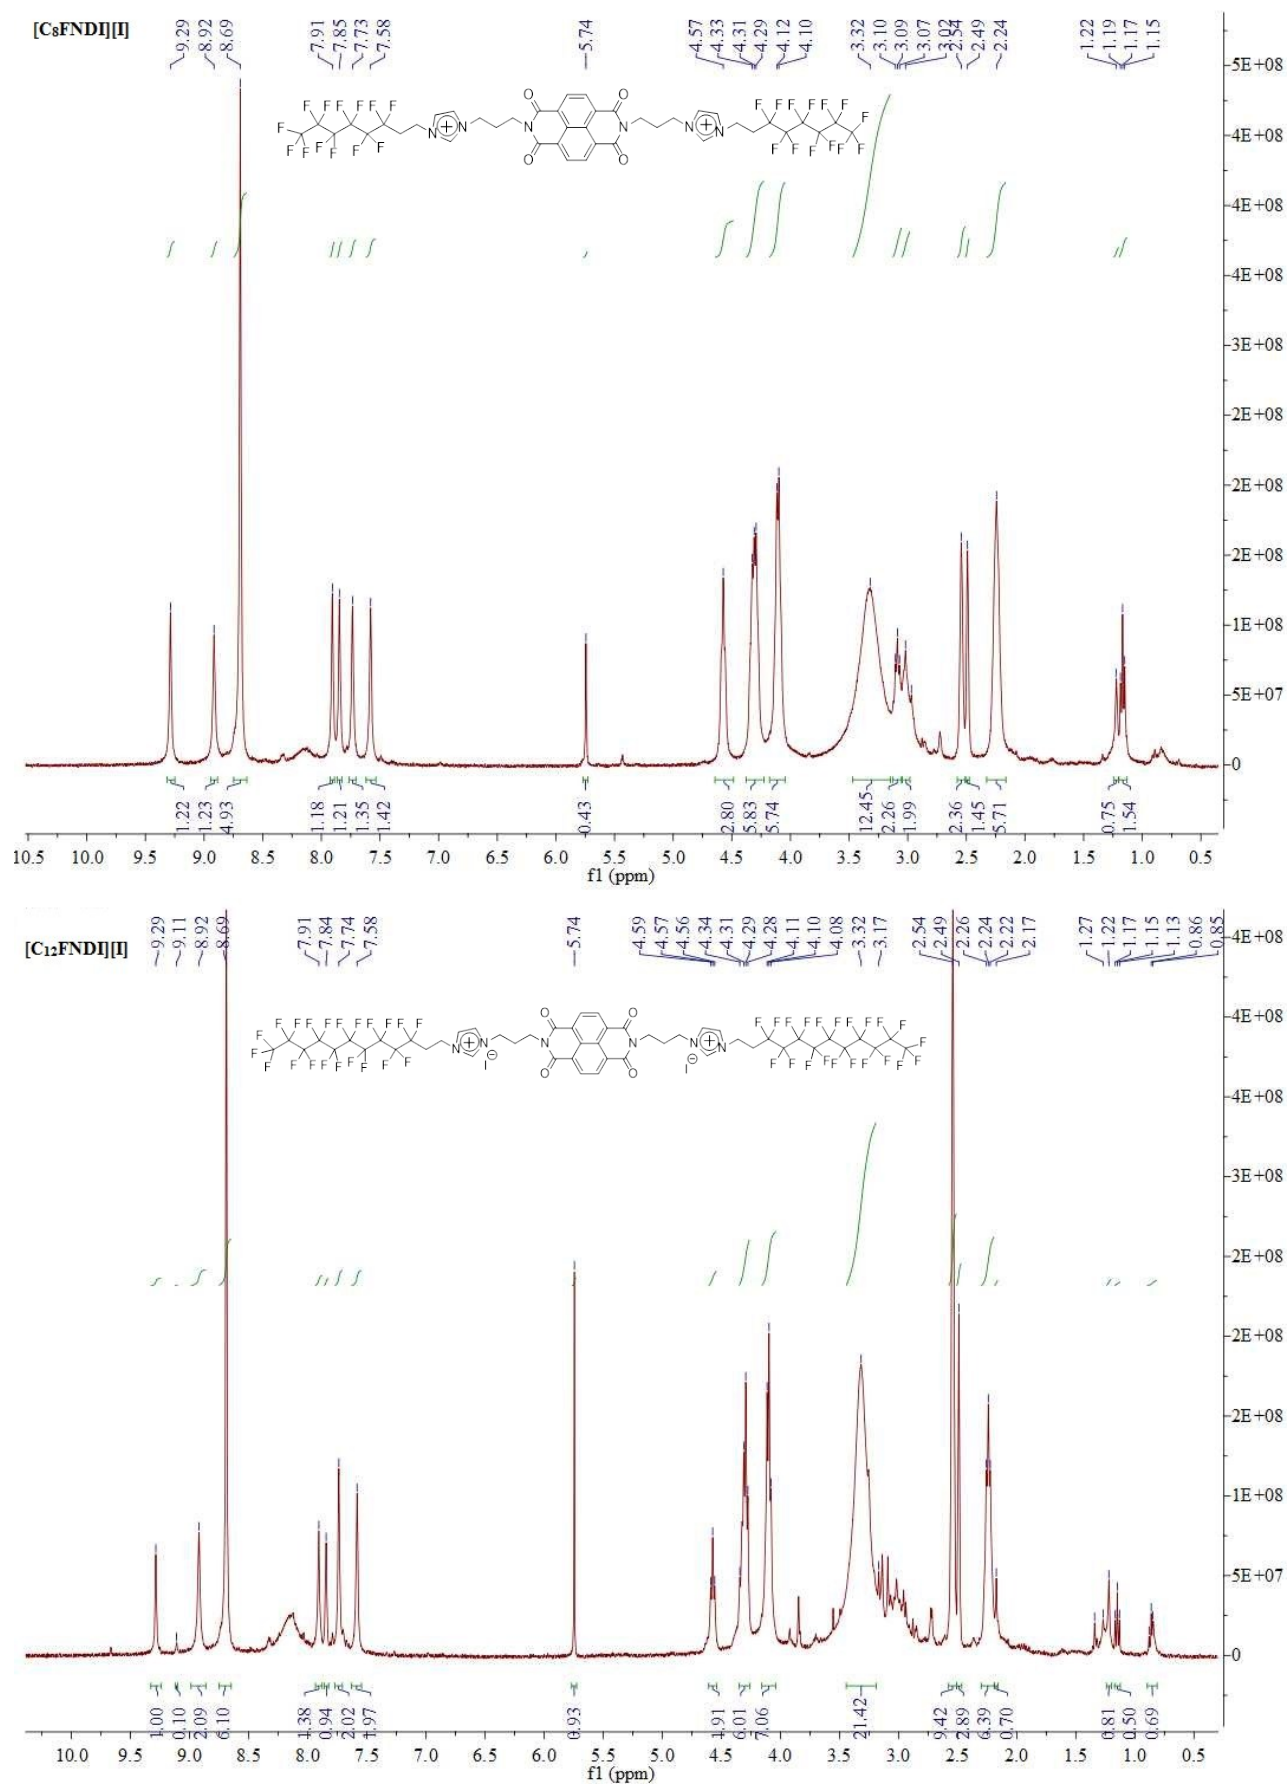

Figure S13. <sup>1</sup>H NMR and <sup>13</sup>C NMR spectra of synthesized salts.

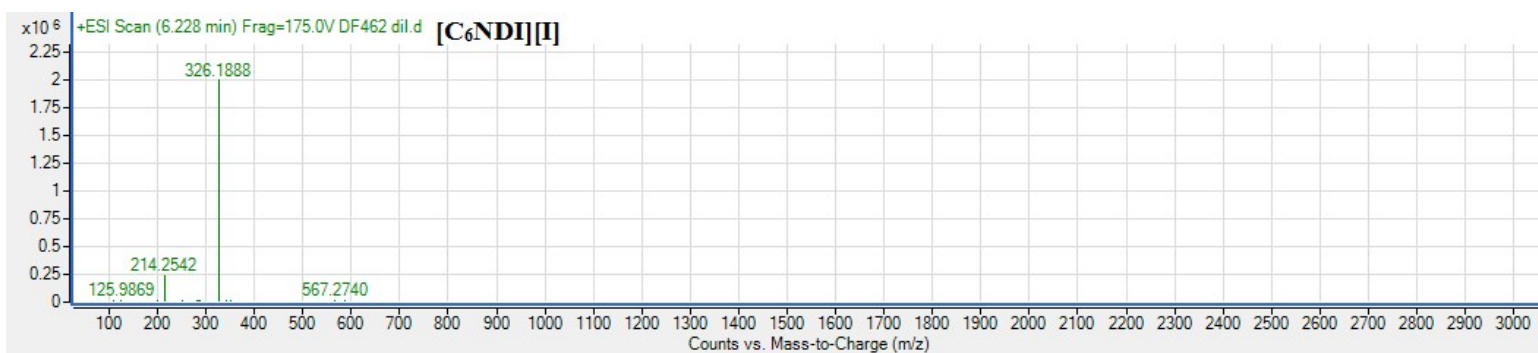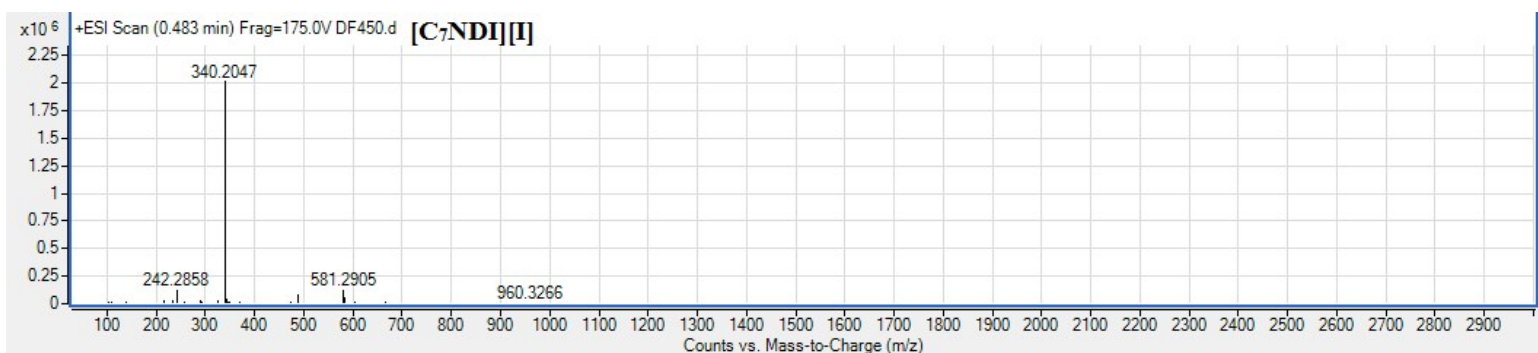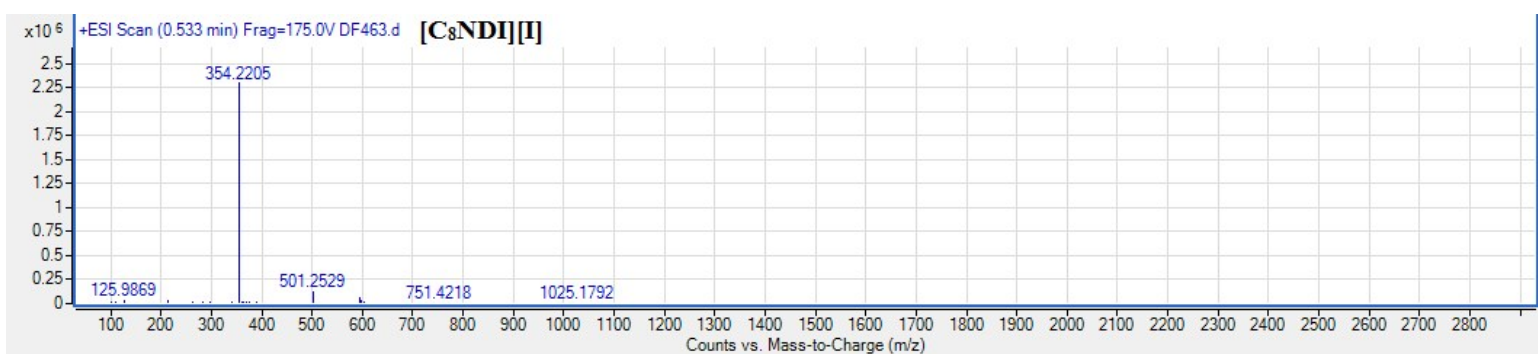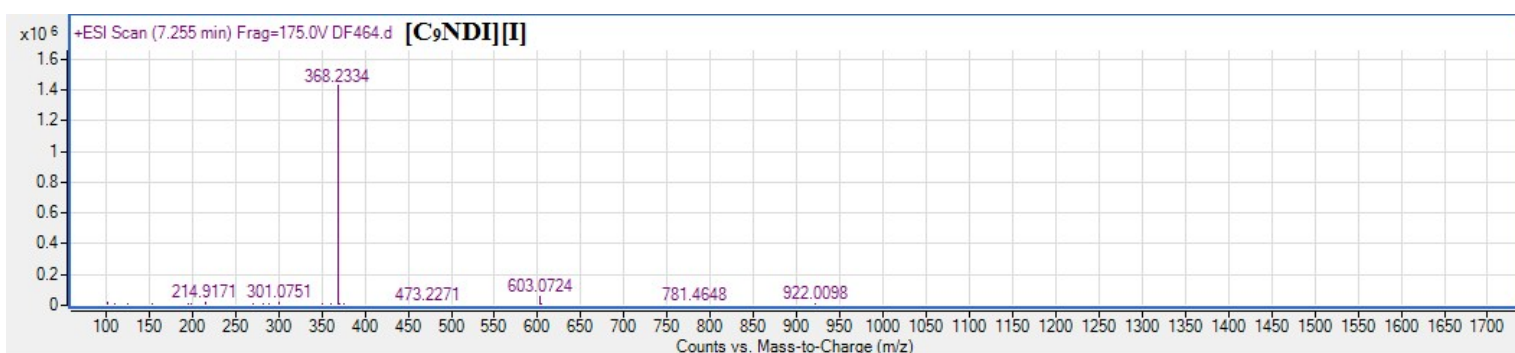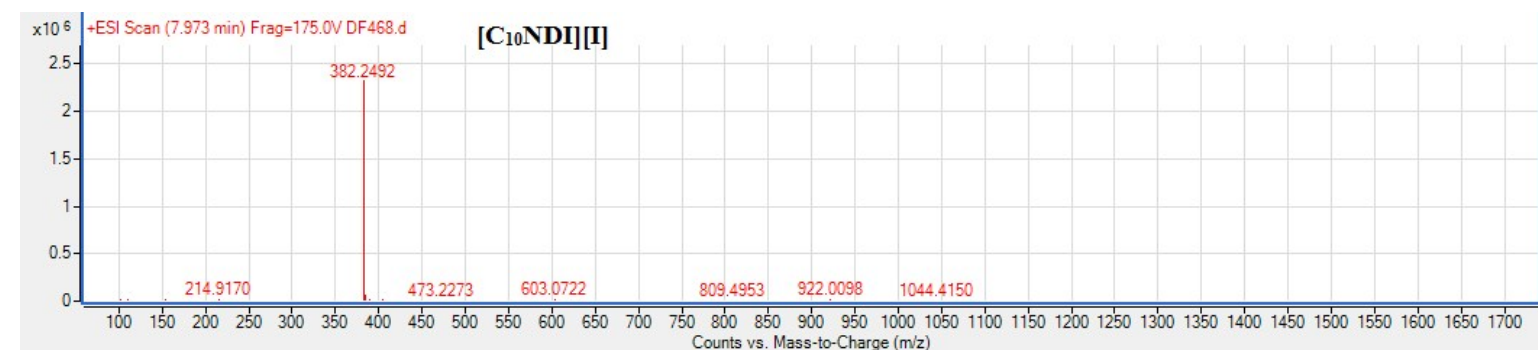

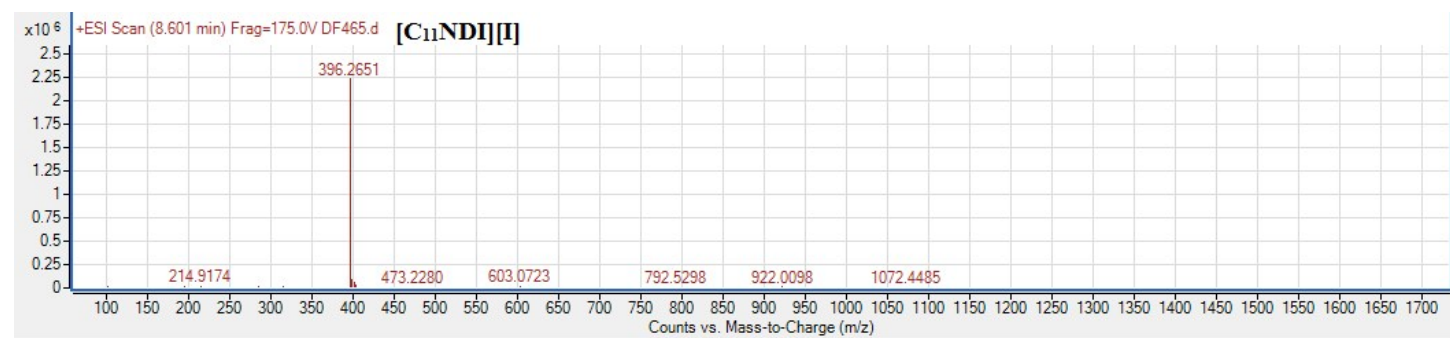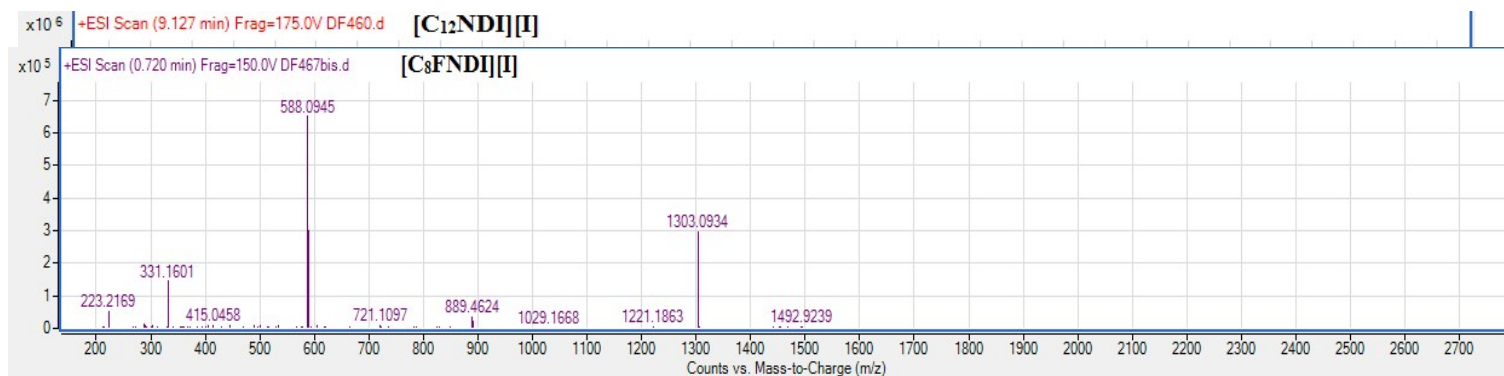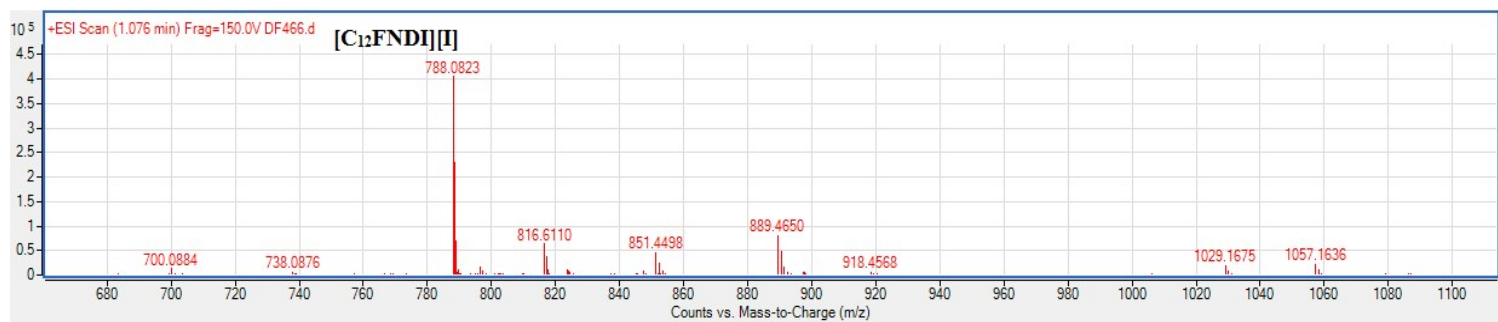

**Figure S14.**ESI Mass spectra of synthesized salts.
